# Supplementary material for: Sarcopenia as a predictor of all-cause mortality among older nursing home residents: a systematic review and meta-analysis
Source: PubMed Central journal article supplement — BMJ Open. 2018 Nov 12;8(11):e021252. doi: 10.1136/bmjopen-2017-021252 (PMC6252774; doi:10.1136/bmjopen-2017-021252), 2018-11-12
Supplement: bmjopen-2017-021252.draft_revisions.pdf [file bmjopen-2017-021252.draft_revisions.pdf]

# BMJ Open

BMJ Open is committed to open peer review. As part of this commitment we make the peer review history of every article we publish publicly available.

When an article is published we post the peer reviewers' comments and the authors' responses online. We also post the versions of the paper that were used during peer review. These are the versions that the peer review comments apply to.

The versions of the paper that follow are the versions that were submitted during the peer review process. They are not the versions of record or the final published versions. They should not be cited or distributed as the published version of this manuscript.

BMJ Open is an open access journal and the full, final, typeset and author-corrected version of record of the manuscript is available on our site with no access controls, subscription charges or pay-per-view fees (<http://bmjopen.bmj.com>).

If you have any questions on BMJ Open's open peer review process please email [editorial.bmjopen@bmj.com](mailto:editorial.bmjopen@bmj.com)

# BMJ Open

## Sarcopenia as a predictor of all-cause mortality among older nursing home residents: a systematic review and meta-analysis.

|                               |                                                                                                                                                                                                                                                                                                                                                                                                                                                                                                                                                                                                                                                                                                                                                                                                                                                                                      |
|-------------------------------|--------------------------------------------------------------------------------------------------------------------------------------------------------------------------------------------------------------------------------------------------------------------------------------------------------------------------------------------------------------------------------------------------------------------------------------------------------------------------------------------------------------------------------------------------------------------------------------------------------------------------------------------------------------------------------------------------------------------------------------------------------------------------------------------------------------------------------------------------------------------------------------|
| Journal:                      | <i>BMJ Open</i>                                                                                                                                                                                                                                                                                                                                                                                                                                                                                                                                                                                                                                                                                                                                                                                                                                                                      |
| Manuscript ID                 | bmjopen-2017-021252                                                                                                                                                                                                                                                                                                                                                                                                                                                                                                                                                                                                                                                                                                                                                                                                                                                                  |
| Article Type:                 | Research                                                                                                                                                                                                                                                                                                                                                                                                                                                                                                                                                                                                                                                                                                                                                                                                                                                                             |
| Date Submitted by the Author: | 24-Dec-2017                                                                                                                                                                                                                                                                                                                                                                                                                                                                                                                                                                                                                                                                                                                                                                                                                                                                          |
| Complete List of Authors:     | Zhang, Xiaoming; Department of Emergency, the affiliated Baoan Hospital of Southern Medical University, People's hospital of Baoan ShenZhen<br>Wang, Conghua; Department of Emergency, the affiliated Baoan Hospital of Southern Medical University, People's hospital of Baoan ShenZhen<br>Dou, Qingli; Department of Emergency, the affiliated Baoan Hospital of Southern Medical University, People's hospital of Baoan ShenZhen<br>Zhang, Wenwu; Department of Emergency, the affiliated Baoan Hospital of Southern Medical University, People's hospital of Baoan ShenZhen<br>Yang, Yunzhi; Department of Nursing, the affiliated Baoan Hospital of Southern Medical University, People's hospital of Baoan ShenZhen,<br>Department of Nursing<br>Xie, Xiaohua; Department of Nursing, the affiliated hospital of ShenZhen University, the second people's hospital of ShenZhen |
| Keywords:                     | Sarcopenia, All-cause mortality, Nursing Home, Meta-analysis                                                                                                                                                                                                                                                                                                                                                                                                                                                                                                                                                                                                                                                                                                                                                                                                                         |
|                               |                                                                                                                                                                                                                                                                                                                                                                                                                                                                                                                                                                                                                                                                                                                                                                                                                                                                                      |

SCHOLARONE™  
Manuscripts

Only

1  
2  
3 **Sarcopenia as a predictor of all-cause mortality among older nursing home**  
4 **residents: a systematic review and meta-analysis.**  
5

6 Xiaoming Zhang<sup>1†</sup>, Conghua Wang<sup>1†</sup>, Qingli Dou<sup>1</sup>, Wenwu Zhang<sup>1</sup>, Yunzhi Yang<sup>2\*</sup>, Xiaohua  
7 Xie<sup>3</sup>  
8  
9

10 <sup>1</sup>Department of Emergency, the affiliated Baoan Hospital of Southern Medical  
11 University, People's hospital of Baoan ShenZhen  
12  
13

14 <sup>2</sup>Department of Nursing, the affiliated Baoan Hospital of Southern Medical  
15 University, People's hospital of Baoan ShenZhen  
16  
17

18 <sup>3</sup>Department of Nursing, the affiliated hospital of ShenZhen University, the second  
19 people's hospital of ShenZhen  
20  
21

22  
23 <sup>†</sup>Co-first authors  
24

25 <sup>\*</sup>Corresponding author  
26

27 Correspondence to: zjhkbcg@163.com. Mail Address: No. 118, longjing, Baoan  
28 District, Shenzhen 518101, China. Tel: +86-1518135397.  
29  
30  
31  
32  
33  
34  
35  
36  
37  
38  
39  
40  
41  
42  
43  
44  
45  
46  
47  
48  
49  
50  
51  
52  
53  
54  
55  
56  
57  
58  
59  
60

## Abstract

Objective: this present study aims to review the evidence of sarcopenia as a predictor of all-cause mortality among elderly nursing home residents.

Design: systematic review and meta-analysis

Methods: Systematic review of literature and meta-analysis were performed using 3 electronic databases (PubMed, EMBASE, and the Cochrane Library) searching for studies that prospectively examined the relationship between sarcopenia and all-cause mortality among elderly nursing home residents.

Results: Of 2292 studies identified through the systematic review, six studies (1494 participants) were included in the meta-analysis. Sarcopenia was significantly associated with higher risk for all-cause mortality among elderly nursing home residents (pooled OR=1.69, 95% confidence interval [95% CI] =1.24-2.30, P=0.001).

In addition, the subgroup analysis for length of follow-up demonstrated that follow-up period 1 year or more years analysis was association with all-cause mortality (pooled HR 1.64, 95% CI 1.16-2.33, p=0.006), however, it was not found with the follow-up period less than 1 year. Similar result was also found with the number of size is greater than (or equal to) 100 (pooled OR=1.86, 95% CI=1.34-2.60).

Conclusion: sarcopenia is found to be a significant predictor of all-cause mortality among older nursing home people. Therefore, it is significant to diagnose Sarcopenia and to intervene, for the sake of reducing mortality rates in the elderly people among nursing home.

**Key words:** Sarcopenia; All-cause mortality; Nursing Home; Meta-analysis

### Strengths and limitations of this study

1. we used an extensive search process in electronic data-base and assessed, methodological quality, and tested the heterogeneity and publication bias among the included studies.
2. This systematic review and meta-analysis assessed the overall quality of the evidence using Newcastle Ottawa Scale (NOS) approach.
3. The pooled results showed good consistency (low between-study heterogeneity), because we used same unified diagnostic criteria of Sarcopenia(EWGSOP) and the same population( nursing home resident elderly people).
4. the studies included in this analysis were insufficient and the size sample was relatively smaller.
5. language of studies was limited to English and consequently we may have missing data from important studies published in other languages, which may result in potential language bias.

## 1. Introduction

Sarcopenia is a common syndrome characterized by a loss of muscle mass and strength with functional impairment and adverse health outcomes due to cumulative deficits of multiple systems<sup>1</sup>. Particularly, nursing home residents are at high risk for Sarcopenia<sup>2</sup>. According to the studies, the prevalence of Sarcopenia was 1-29% for community-dwelling older adults, 14-33% in nursing homes and 10-24.3% for those in hospitals<sup>3</sup>. Sarcopenia leads to worse outcome in elderly people including physical disability, fall, fractures, poor quality of life, mortality and hospitalization<sup>4-6</sup>. Among these, mortality might be considered the most important outcome in elderly people. So far the relationship between mortality and operational criteria defined Sarcopenia has been well described in community-dwelling older adults and hospital patients. A recent meta-analysis study, Liu<sup>7</sup>*et al* analyzed the sarcopenia and mortality with the conclusion that Sarcopenia is a predictor of all-cause mortality among

1  
2  
3 community-dwelling older people. However, there is no consistent conclusion  
4 regarding the relationship between sarcopenia and mortality among nursing home  
5 resident. It has been shown that the mortality rate in nursing home is approximately  
6 eightfold higher than that in the community, therefore, it is very important to confirm  
7 the risk factor for mortality among nursing home resident.  
8  
9  
10  
11

12 Several studies found that old people with sarcopenia were predictor of all-cause  
13 mortality among nursing home resident<sup>8,9</sup>. However, some studies didn't find out any  
14 significant relationship between sarcopenia and all-cause mortality<sup>10-13</sup>. Given the  
15 observed contradictory relationship between sarcopenia and all-cause mortality  
16 among nursing home resident in some studies, further studies are needed, However,  
17 no systematic review of meta-analysis studies on this topic have been conducted in  
18 the literature. Therefore, our study aims to identify and compare prospective cohort  
19 studies examining sarcopenia as a predictor of all-cause mortality among nursing  
20 home resident according to the PRISMA guidelines.  
21  
22  
23  
24  
25  
26  
27  
28

## 29 **2. Materials and methods**

30 This systematic review was undertaken and reported according to the Preferred  
31 Reporting Items for Systematic Reviews and Meta-Analyses (PRISMA) guidelines<sup>14</sup>.  
32  
33

### 34 **2.1. Search strategy and selection criteria**

35 A systematic literature search were conducted in PubMed, EMBASE, and  
36 Cochrane CENTRAL Library Issue in November 2017. The search strategy was tailored  
37 to according to each database. We used a combination of key words such as  
38 mortality(mortality\*), OR death(death\*), OR survival(survival\*) and sarcopenia  
39 (sarcopenia\*), as well as MeSH terms. Subject terms and truncation symbol were also  
40 used in our search strategy. We searched the potential gray studies through Google  
41 Scholar. Furthermore, a manual search was carried out on the references of included  
42 studies.  
43  
44  
45  
46  
47  
48  
49  
50

### 51 **2.2. Study selection**

52 These studies identified by our search strategy were reviewed by teams of  
53 two independently blinded reviewers (Zhang XM and Wang CH) who evaluated each  
54 title and abstract. In case of disagreement on inclusion or exclusion of studies, this  
55  
56  
57  
58  
59  
60

1  
2  
3 issue was discussed and a third reviewer evaluated the study until consensus was  
4 reached by the reviewers.  
5

### 6 7 **2.3. Inclusion and exclusion criteria**

8  
9 The following eligibility and exclusion criteria were prespecified. Studies had to  
10 fulfill the following four inclusion criteria: (1) prospective cohort studies, (2) studies  
11 investigating whether sarcopenia was a predictor of mortality, (3) studies reporting  
12 clear diagnostic criteria for sarcopenia (4) Type of participant: elderly adult among  
13 nursing home or nursing care. Exclusion criteria were as following: (1) Type of  
14 participant: community-dwelling older people (aged 65 years and older) or  
15 hospitalized older people; (2) article type: only abstract, letters and laboratory  
16 research; review articles; (3) insufficient date; (4) other languages of studies, except  
17 English.  
18  
19

### 20 21 22 23 24 **2.4. Data extraction**

25  
26 Two investigators (Zhang XM, Wang CH) independently abstracted the data from  
27 the selected studies using a standardized data-abstraction form. The following  
28 information were extracted from included papers: author, country, year of publication,  
29 demographic characteristics of participants (e.g., sample size, male proportion),  
30 measurement methods of sarcopenia, follow-up period, study quality. The reviewers  
31 cross-checked all extracted data. Disagreements were resolved by discussion until  
32 consensus was reached.  
33  
34  
35  
36  
37  
38

### 39 40 41 **2.5. Assessment of risk bias**

42  
43 Assessment of risk of bias was performed by two independent reviewers (Zhang  
44 XM, Wang CH) according to the Newcastle Ottawa Scale (NOS)<sup>15</sup>: (1)  
45 representativeness of the exposed cohort, (2) comparability of group, (3) blinding of  
46 investigators who measured outcomes, (4) the time and completeness of follow-up, (5)  
47 contamination bias, and (6) other potential sources of bias. Articles were scored as  
48 follows: > 7 as high quality (NOS).  
49  
50  
51

### 52 53 **2.6. Statistical analysis**

54  
55 The STATA version 14.0 (Stata Corp, College Station, TX, USA) was  
56 independently used for all analyses by two authors ((Zhang XM, Dou QL). Hazard  
57  
58  
59

1  
2  
3 ratios(HRs), odds ratio(OR) and their 95%CIs of mortality for sarcopenia compared  
4 with non-sarcopenia were extracted from studies for future meta-analysis. Subgroup  
5 analyses were conducted by sample size, follow-up period, if there was more than one  
6 study in the subgroup. The statistical heterogeneity among the included studies was  
7 examined with Cochran's Q statistic using chi-square and I<sup>2</sup> Statistics, and I<sup>2</sup> value of  
8 25%, 50% and 75% represented the cut-off of low, moderate and high heterogeneity,  
9 respectively. If heterogeneity was found to be reasonably high between studies, the  
10 random effects model was used. Otherwise, the fixed effects model was used. Results  
11 were illustrated using forest plots.  
12  
13  
14  
15  
16  
17  
18

### 19 **3. Results**

#### 20 **3.1. Search results**

21  
22 The literature search strategy initially identified 2292 articles. After removal of  
23 duplicates, 1965 articles were screened for potential eligibility. A total of 85  
24 publications remained for further consideration after that we screened titles and  
25 abstracts and removed non-relative articles. These studies were screened according to  
26 the predefined inclusion and exclusion criteria for including in the meta-analysis,  
27 resulting in a total of six eligible studies (Figure.1).  
28  
29  
30  
31  
32  
33

#### 34 **3.2 Included studies**

35  
36 Six prospective cohort studies were included in our meta-analysis with the total  
37 number of 1494 participants. Study characteristics of included papers are displayed in  
38 table 1. There were 2 studies conducted in Turkey<sup>16, 17</sup>, 1 study in Italy<sup>18-20</sup>, 1  
39 study in Australia<sup>21</sup>, 1 study in Belgium, 1 study in Israel. All of the studies selected  
40 all-cause mortality as the clinical outcome, and used the sarcopenia criteria of  
41 EWGSOP. The EWGSOP defined sarcopenia in men as ALM adjusted for height  
42 squared  $\leq 7.26 \text{ kg/m}^2$  OR  $\leq 5.54 \text{ kg/m}^2$  for women combined with low hand-grip  
43 strength ( $< 30 \text{ kg}$ ) and low gait speed ( $< 0.8 \text{ m/s}$ ), and/or low grip strength  $< 30 \text{ kg}$   
44 for men and  $< 20 \text{ kg}$  for women<sup>22</sup>. The prevalence of sarcopenia ranged from 32.8% to  
45 73.3%. The largest study consisted of 662 men and women, and the smallest cohort  
46 only had 58 individuals. Follow-up periods were not longer varying from 6 months to  
47 24 months, and the adjusted HR were displayed in four studies, and one was used OR,  
48  
49  
50  
51  
52  
53  
54  
55  
56  
57  
58  
59  
60



1  
2  
3 the other one was RR.  
4

### 5 **3.3 Quality assessment**

6 The methodological quality evaluation using NOS was shown in Table1. The  
7 score ranged from six to nine, the scores of five studies were more than seven.  
8  
9

### 10 **3.4 Sarcopenia as a predictor of mortality**

#### 11 **3.4.1 Meta-analysis of studies**

12 Six studies examined the association between sarcopenia and mortality among  
13 nursing home resident. The pooled HR values were calculated by fixed-effects models.  
14 As show in Figure2, The pooled hazard ratios (HRs) of all-cause mortality for  
15 sarcopenia versus the non-sarcopenia was 1.69(95%CI=1.24-2.30,P=0.001). No  
16 significant heterogeneity was observed across these studies((Q-value = 4.33, degree of  
17 freedom =5,I<sup>2</sup>= 0%, p =0.503).  
18  
19  
20  
21  
22  
23  
24

#### 25 **3.4.2 Subgroup analysis**

26 The six studies with HR of all-cause mortality risks for sarcopenia among nursing  
27 home resident were further analyze by subgroup. Figure3 presents a comparison of  
28 all-cause mortality risk stratified by length of follow-up for muscle mass. Two studies  
29 with follow-up period less than 1year for muscle mass(pooled HR 1.85, 95%CI  
30 0.95–3.60, p = 0.070); whereas the other four studies with follow-up period 1year or  
31 more years analysis (pooled HR 1.64,95%CI 1.16-2.33,p=0.006). Figure 4 displays  
32 comparison of all-cause mortality risk stratified by sample size which indicated the  
33 number of size less 100(pooled HR 0.81,95%CI 0.33-1.98,p = 0.645), but the number  
34 of size is greater than (or equal to) 100(pooled HR 1.86, 95% CI 1.34-2.60,p = 0.001).  
35  
36  
37  
38  
39  
40  
41  
42  
43

#### 44 **3.4.3 publication bias assessment**

45 There was no significant publication among the studies using Begg's  
46 test:P=0.260.(Figure 5)  
47  
48  
49  
50

## 51 **4. Discussion**

52 In this meta-analysis, we found evidence suggesting the risk of all-cause  
53 mortality among nursing resident older people with Sarcopenia was higher than that  
54 among nursing resident older people without Sarcopenia. To the best of our  
55  
56  
57  
58  
59  
60

1  
2  
3 knowledge, this is the first meta-analysis to explore the relationship between  
4 Sarcopenia and all-cause mortality among nursing resident elderly people. Our study  
5 indicated assessing Sarcopenia is really important among the aged that living in  
6 nursing home or care.  
7  
8  
9

10 Ping Liu<sup>7</sup> *et al.* implemented a systematic review and meta-analysis regarding  
11 the association of sarcopenia with mortality in 2016, published in 2017. However, this  
12 review including population were all involving community-dwelling older people. It  
13 is quite obvious that community-dwelling older people is totally different with the  
14 aged living in nursing home. Community-dwelling older people is relatively healthy,  
15 well-functioning individuals than elderly people living in nursing home. So far  
16 Shu-Fang Chang<sup>23</sup> and Beaudart<sup>24</sup> both performed a systematic review to evaluate the  
17 link between Sarcopenia and all-cause mortality, however there were some  
18 methodological shortcomings, such as various diagnostic criteria of Sarcopenia, crude  
19 ORs as effect, various population involving community-dwelling older people,  
20 hospitalized patients. Although subgroup of nursing home resident was analyze in  
21 Beaudart's study, there is only two research was assessed, which maybe underestimate  
22 or overestimated their result. There were six studies in our review, which only focus  
23 on the association of mortality and Sarcopenia in nursing home elderly people. We  
24 adopted the same diagnostic criteria of Sarcopenia(EWGSOP) and the Same type  
25 population (nursing home resident elderly people) to decreased clinical heterogeneity.  
26  
27  
28  
29  
30  
31  
32  
33  
34  
35  
36  
37  
38  
39

40 This meta-analysis of including six cohort studies, shows Sarcopenia is an  
41 important predictor of all-cause mortality among elderly nursing home resident. The  
42 pooled HR value of all-cause mortality was 1.69(95%CI=1.24-2.30, P=0.001, I<sup>2</sup> =  
43 0%). The perfect I<sup>2</sup> suggesting no significant heterogeneity was showed across these  
44 researches. In addition our study pooled HR value is higher than Ping Liu(1.60  
45 95%CI: 1.24–2.06 ), the primary reason was the different type of population. The  
46 aged living in nursing home usual had worse health condition that may had more  
47 comorbidities, more disability and more geriatric syndromes, such as cognitive  
48 dysfunction and malnutrition<sup>11, 25-27</sup>. This comprehensive risk factor may aggravate  
49 the process of Sarcopenia.  
50  
51  
52  
53  
54  
55  
56  
57  
58  
59  
60

1  
2  
3 The prevalence of Sarcopenia was 32.8-73.3% which is higher than other studies,  
4 the different was mainly due to the mean age, various population and different  
5 diagnostic tools, particularly the ways measure of muscle mass. Sarcopenia was  
6 associated with all-cause mortality in the size of sample 100 or more numbers group,  
7 but it was not significant in the size of less 100 group when subgroup was conducted  
8 according to size number in this systematic review. It was known that the larger the  
9 sample size, the more confident of the statistic. The subgroup of length of follow-up  
10 analysis was demonstrated that follow-up period 1 year or more years analysis was  
11 association with all-cause mortality (pooled HR 1.64, 95%CI 1.16-2.33,  $p=0.006$ ),  
12 however, it was not found with the follow-up period less than 1 year. The reason  
13 maybe, with the time of aging, Sarcopenia will aggravatingly impact to survival of  
14 patient, which may increase the rates of mortality.

15  
16 The underlying mechanisms between sarcopenia and a higher risk of all-cause  
17 mortality did not have a conclusion, some aspects should be mentioned at least.  
18 Firstly Sarcopenia is linked to multifactor ranging to aging process<sup>28</sup>, multiple  
19 Chronic health conditions, unhealthy lifestyle<sup>29</sup>, hormonal factors<sup>30</sup>, inflammation<sup>31</sup>  
20 and so on<sup>32</sup>. In the meanwhile, the above factors are considered linked to mortality and  
21 the development of multifactor worsened the situation of Sarcopenia leading to a  
22 passive adaptation to adversity or external stressors, which in turn generate an increased  
23 poor adverse outcomes<sup>33</sup>. Secondly, according to the study of Fried<sup>34</sup> *et al.*, sarcopenia  
24 was an critical etiological role in the frailty process, which is related, through frailty,  
25 to pernicious consequences. For instance recurrent falls, bone fracture, disability,  
26 multiple emergency room visits and hospital admissions, and eventually death<sup>35, 36</sup>.  
27 For sarcopenia is a geriatric syndrome rather than a disease, the mechanism of  
28 Sarcopenia must be complex, which need more researches to explore.

29  
30 Our meta-analysis review has multiple strengths and some limitation. One  
31 strength is we used an extensive search process in electronic data-base and assessed,  
32 methodological quality, and tested the heterogeneity and publication bias among the  
33 included studies. Another strength was the same unified diagnostic criteria of  
34 Sarcopenia (EWGSOP) and the same population (nursing home resident elderly  
35  
36  
37  
38  
39  
40  
41  
42  
43  
44  
45  
46  
47  
48  
49  
50  
51  
52  
53  
54  
55  
56  
57  
58  
59  
60

1  
2  
3 people) to reduce heterogeneity, and improve the research quality. There are some  
4 limitations in our studies. Firstly, the studies included in this analysis were insufficient  
5 and the size sample was relatively smaller. Secondly, language of studies was limited  
6 to English and consequently we may have missing data from important studies  
7 published in other languages, which may result in potential language bias. In addition,  
8 the follow-up was relatively short for the necessary latency, which maybe  
9 underestimate the results.  
10  
11  
12  
13  
14  
15

## 16 **5. Conclusion**

17  
18 This study provides the evidence that sarcopenia is a significant predictor of  
19 all-cause mortality among nursing home resident older people based on the  
20 comprehensive systematic review and meta- Analysis. Future studies are needed to  
21 provide evidence for specific interventions aimed at preventing and treating  
22 Sarcopenia, which can reduce the mortality in the elderly people living in nursing  
23 home.  
24  
25  
26  
27  
28

## 29 **6. Acknowledgements**

30  
31 The authors thank the staffs of the Department of Emergency Medicine, people's  
32 hospital of Baoan ShenZhen for their guidance and support.  
33

## 34 **7. Financial Support**

35  
36 This research received no specific grant from any funding agency, commercial or  
37 not-for-profit sectors. No sponsors had any role in the design, methods, subject  
38 recruitment, data collections, analysis, or preparation of this manuscript.  
39  
40

## 41 **8. Contributors**

42  
43 Xiaoming Zhang was responsible for producing the initial draft of the manuscript.

44  
45 Conghua Wang was responsible for data extraction and for producing the initial draft  
46 of the manuscript.  
47

48  
49 Qingli Dou was responsible for data extraction.

50  
51 Wenwu Zhang was responsible for screening the papers and quality assessment.

52  
53 Xiaohua Xiewas responsible for screening the papers.

54  
55 Yunzhi Yang was responsible for quality assessment, statistical analysis and revision  
56 of the manuscript.  
57  
58  
59  
60

All the authors approved the final version of the manuscript

## 9. Conflict of Interest

None of the authors have any conflict of interest to declare.

## 10. Data Sharing Statements

All the data can find in the electronic databases(PubMed, EMBASE, and the Cochrane Library).

1. Cruz-Jentoft AJ, Baeyens JP, Bauer JM, et al. Sarcopenia: European consensus on definition and diagnosis: Report of the european working group on sarcopenia in older people. *Age and ageing*2010;39:412-423
2. Landi F, Liperoti R, Fusco D, et al. Prevalence and risk factors of sarcopenia among nursing home older residents. *The journals of gerontology. Series A, Biological sciences and medical sciences*2012;67:48-55
3. Cruz-Jentoft AJ, Landi F, Schneider SM, et al. Prevalence of and interventions for sarcopenia in ageing adults: A systematic review. Report of the international sarcopenia initiative (ewgsop and iwgs). *Age and ageing* 2014;43:748-759
4. Beaudart C, McCloskey E, Bruyere O, et al. Sarcopenia in daily practice: Assessment and management. *BMC Geriatr* 2016;16:170
5. Woo J. Sarcopenia. *Clin Geriatr Med.* 2017;33:305-314
6. Landi F, Liperoti R, Russo A, et al. Sarcopenia as a risk factor for falls in elderly individuals: Results from the ilsirente study. *Clinical nutrition (Edinburgh, Scotland)* 2012;31:652-658
7. Liu P, Hao Q, Hai S, et al. Sarcopenia as a predictor of all-cause mortality among community-dwelling older people: A systematic review and meta-analysis. *Maturitas* 2017;103:16-22
8. Buckinx F, Croisier JL, Reginster JY, et al. Prediction of the incidence of falls and deaths among elderly nursing home residents: The senior study. *Journal of the American Medical Directors Association* 2017
9. Landi F, Liperoti R, Fusco D, et al. Sarcopenia and mortality among older nursing home residents. *Journal of the American Medical Directors Association* 2012;13:121-126
10. Henwood T, Hassan B, Swinton P, et al. Consequences of sarcopenia among nursing home residents at long-term follow-up. *Geriatric nursing (New York, N.Y.)* 2017;38:406-411
11. Saka B, Ozkaya H, Karisik E, et al. Malnutrition and sarcopenia are associated with increased mortality rate in nursing home residents: A prospective study. *European Geriatric Medicine* 2016;7:232-238
12. Yalcin A, Aras S, Atmis V, et al. Sarcopenia and mortality in older people living in a nursing home in turkey. *Geriatrics and Gerontology International* 2017;17:1118-1124
13. Kimyagarov S, Klid R, Fleissig Y, et al. Skeletal muscle mass abnormalities are associated with survival rates of institutionalized elderly nursing home residents. *The journal of nutrition, health & aging* 2012;16:432-436
14. Moher D, Liberati A, Tetzlaff J, et al. Preferred reporting items for systematic reviews and meta-analyses: The prisma statement. *International journal of surgery (London, England)*

- 2010;8:336-341
15. Stang A. Critical evaluation of the newcastle-ottawa scale for the assessment of the quality of nonrandomized studies in meta-analyses. *European journal of epidemiology* 2010;25:603-605
  16. Chalhoub D, Cawthon P, Ensrud K, et al. Risk of non-spine fractures among men and women with sarcopenia, low bone mass or both. *Journal of Bone and Mineral Research* 2013;28
  17. Cawthon PM, Blackwell TL, Cauley J, et al. Evaluation of the usefulness of consensus definitions of sarcopenia in older men: Results from the observational osteoporotic fractures in men cohort study. *Journal of the American Geriatrics Society* 2015;63:2247-2259
  18. Scott D, Seibel M, Cumming R, et al. Sarcopenic obesity and its temporal associations with changes in bone mineral density, incident falls, and fractures in older men: The concord health and ageing in men project. *Journal of Bone and Mineral Research* 2017;32:575-583
  19. Scott D, Chandrasekara SD, Laslett LL, et al. Associations of sarcopenic obesity and dynapenic obesity with bone mineral density and incident fractures over 5–10 years in community-dwelling older adults. *Calcified Tissue International* 2016;99:30-42
  20. Yu R, Leung J, Woo J. Incremental predictive value of sarcopenia for incident fracture in an elderly chinese cohort: Results from the osteoporotic fractures in men (mros) study. *Journal of the American Medical Directors Association* 2014;15:551-558
  21. Hars M, Biver E, Chevalley T, Herrmann F, et al. Low lean mass predicts incident fractures independently from frax: A prospective cohort study of recent retirees. *Journal of Bone and Mineral Research* 2016;31:2048-2056
  22. Lera L, Albala C, Sanchez H, et al. Prevalence of sarcopenia in community-dwelling chilean elders according to an adapted version of the european working group on sarcopenia in older people (ewgsop) criteria. *J Frailty Aging* 2017;6:12-17
  23. Chang SF, Lin PL. Systematic literature review and meta-analysis of the association of sarcopenia with mortality. *Worldviews on evidence-based nursing* 2016;13:153-162
  24. Beaudart C, Zaaria M, Pasleau F, et al. Health outcomes of sarcopenia: A systematic review and meta-analysis. *PloS one* 2017;12:e0169548
  25. Hoffmann F, Kaduszkiewicz H, Glaeske G, et al. Prevalence of dementia in nursing home and community-dwelling older adults in germany. *Aging clinical and experimental research* 2014;26:555-559
  26. Ronald LA, McGregor MJ, McGrail KM, et al. Hospitalization rates of nursing home residents and community-dwelling seniors in british columbia. *Canadian journal on aging = La revue canadienne du vieillissement* 2008;27:109-115
  27. Benzinger P, Becker C, Kerse N, et al. Pelvic fracture rates in community-living people with and without disability and in residents of nursing homes. *Journal of the American Medical Directors Association* 2013;14:673-678
  28. Marzetti E, Lees HA, Wohlgemuth SE, et al. Sarcopenia of aging: Underlying cellular mechanisms and protection by calorie restriction. *BioFactors (Oxford, England)* 2009;35:28-35
  29. Cruz-Jentoft AJ, Kiesswetter E, Drey M, et al. Nutrition, frailty, and sarcopenia. *Aging Clin Exp Res* 2017;29:43-48
  30. Martone AM, Lattanzio F, Abbatecola AM, et al. Treating sarcopenia in older and oldest old. *Curr Pharm Des* 2015;21:1715-1722
  31. Westbury LD, Fuggle NR, Syddall HE, et al. Relationships between markers of inflammation

- 1  
2  
3 and muscle mass, strength and function: Findings from the hertfordshire cohort study. *Calcif*  
4 *Tissue Int* 2017
- 5 32. Malafarina V, Úriz-Otano F, Iniesta R, et al. Sarcopenia in the elderly: Diagnosis,  
6 physiopathology and treatment. *Maturitas* 2012;71:109-114
- 7 33. Cruz-Jentoft AJ, Landi F, Topinkova E, et al. Understanding sarcopenia as a geriatric syndrome.  
8 *Curr Opin Clin Nutr Metab Care* 2010;13:1-7
- 9 34. Fried LP, Tangen CM, Walston J, et al. Frailty in older adults: Evidence for a phenotype. *The*  
10 *journals of gerontology. Series A, Biological sciences and medical sciences* 2001;56:M146-156
- 11 35. Wick JY. Understanding frailty in the geriatric population. *The Consultant pharmacist : the*  
12 *journal of the American Society of Consultant Pharmacists* 2011;26:634-645
- 13 36. Bernabei R, Martone AM, Vetrano DL, et al. Frailty, physical frailty, sarcopenia: A new  
14 conceptual model. *Studies in health technology and informatics* 2014;203:78-84
- 15  
16  
17  
18  
19  
20  
21  
22  
23  
24  
25  
26  
27  
28  
29  
30  
31  
32  
33  
34  
35  
36  
37  
38  
39  
40  
41  
42  
43  
44  
45  
46  
47  
48  
49  
50  
51  
52  
53  
54  
55  
56  
57  
58  
59  
60

Table 1 Summary of Included Studies on sarcopenia Associated with all-cause mortality

| Author,      | Country   | Year | Male  | Sample number | Age of patients, years | Sarcopenia Criteria | Prevalence% | Follow-up period | Outcome             | Effect Measure | Adjusted Or Crude HR/OR | Quality* |
|--------------|-----------|------|-------|---------------|------------------------|---------------------|-------------|------------------|---------------------|----------------|-------------------------|----------|
| Saka B       | Turkey    | 2015 | 51%   | 402           | 78.0 ± 7.9             | EWGSO P             | 73.3        | 12month          | All-cause mortality | HR             | Adjusted                | 8        |
| Yalcin A     | Turkey    | 2017 | 54.3% | 141           | 79.17 ± 7.99           | EWGSO P             | 53.9        | 24month          | All-cause mortality | HR             | Adjusted                | 7        |
| Landi F      | Italy     | 2012 | 25%   | 122           | 84.1 ± 4.8             | EWGSO P             | 32.8        | 6month           | All-cause mortality | HRs            | Adjusted                | 9        |
| Henwood T    | Australia | 2017 | 29.3% | 58            | 85.7 ± 8.2             | EWGSO P             | 51.7        | 18month          | All-cause mortality | RR             | Adjusted                | 6        |
| Buckinx F    | Belgium   | 2017 | 27.5% | 662           | 83.2 ± 8.99            | EWGSO P             | 36.2        | 12month          | All-cause mortality | OR             | Adjusted                | 7        |
| Kimyagarov S | Israel    | 2012 | 41.2% | 109           | 84.9 ± 7.4             | EWGSO               | 40.3        | 12month          | All-cause mortality | HR             | Adjusted                | 7        |



1  
2  
3 Figure 1. Search results and study selection.

4 Figure 2. Meta-analysis of the association between Sarcopenia and mortality among older nursing  
5 home residents.

6 Figure 3. Subgroup analyses of the meta-analysis according to length of follow-up.

7 Figure 4. Subgroup analyses of the meta-analysis according to the sample size.

8 Figure 5. Funnel plot of sarcopenia and all-cause mortality among older nursing home residents.  
9  
10  
11  
12  
13  
14  
15  
16  
17  
18  
19  
20  
21  
22  
23  
24  
25  
26  
27  
28  
29  
30  
31  
32  
33  
34  
35  
36  
37  
38  
39  
40  
41  
42  
43  
44  
45  
46  
47  
48  
49  
50  
51  
52  
53  
54  
55  
56  
57  
58  
59  
60

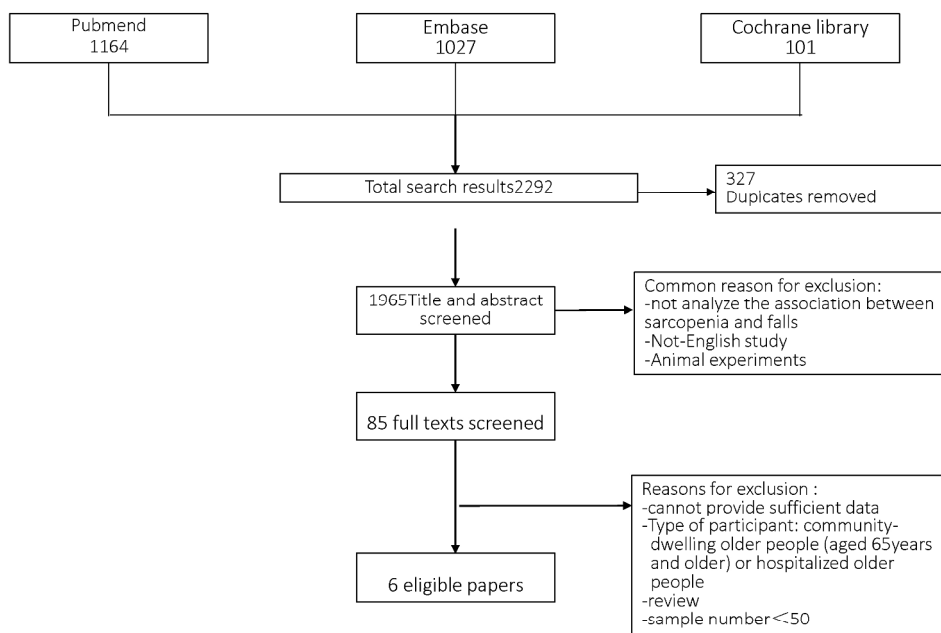

Figure 1. Search results and study selection

254x190mm (300 x 300 DPI)

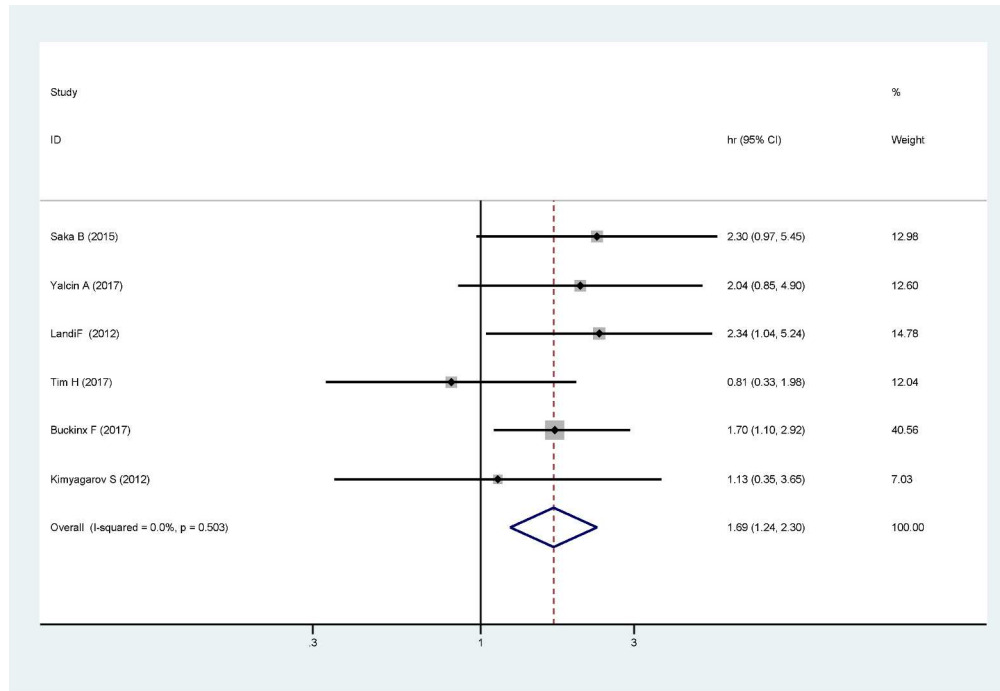

29  
30  
31  
32  
33  
34  
35  
36  
37  
38  
39  
40  
41  
42  
43  
44  
45  
46  
47  
48  
49  
50  
51  
52  
53  
54  
55  
56  
57  
58  
59  
60

Figure 2. Meta-analysis of the association between Sarcopenia and mortality among older nursing home residents

272x188mm (300 x 300 DPI)

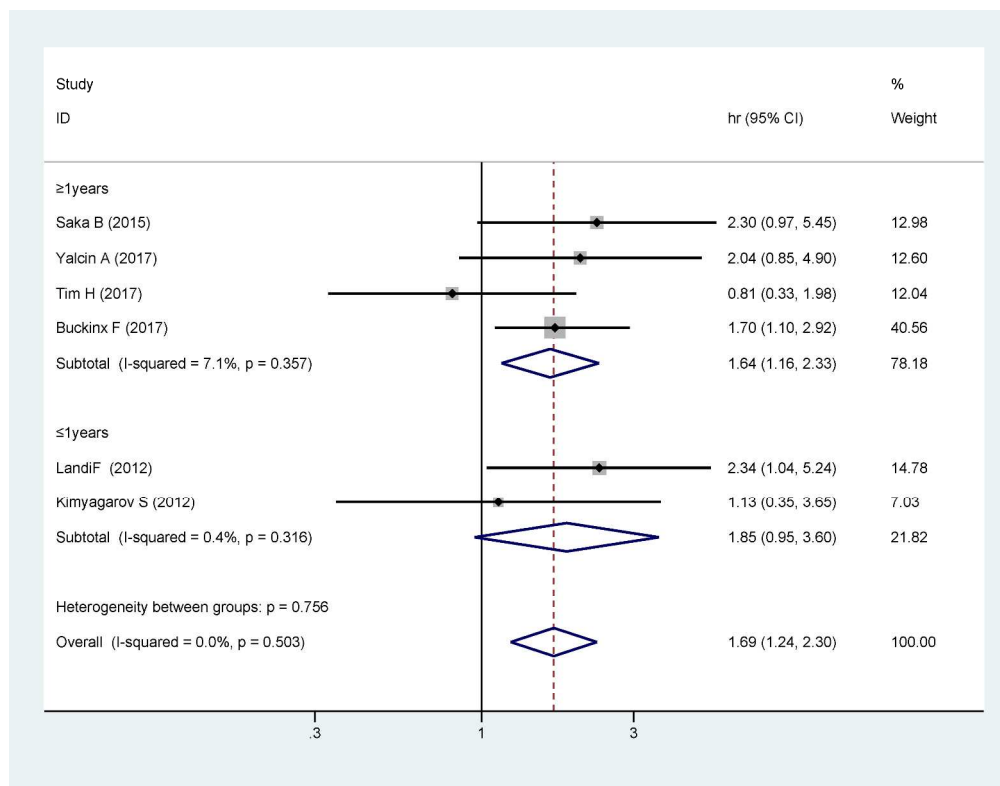

Figure 3. Subgroup analyses of the meta-analysis according to length of follow-up

277x215mm (300 x 300 DPI)

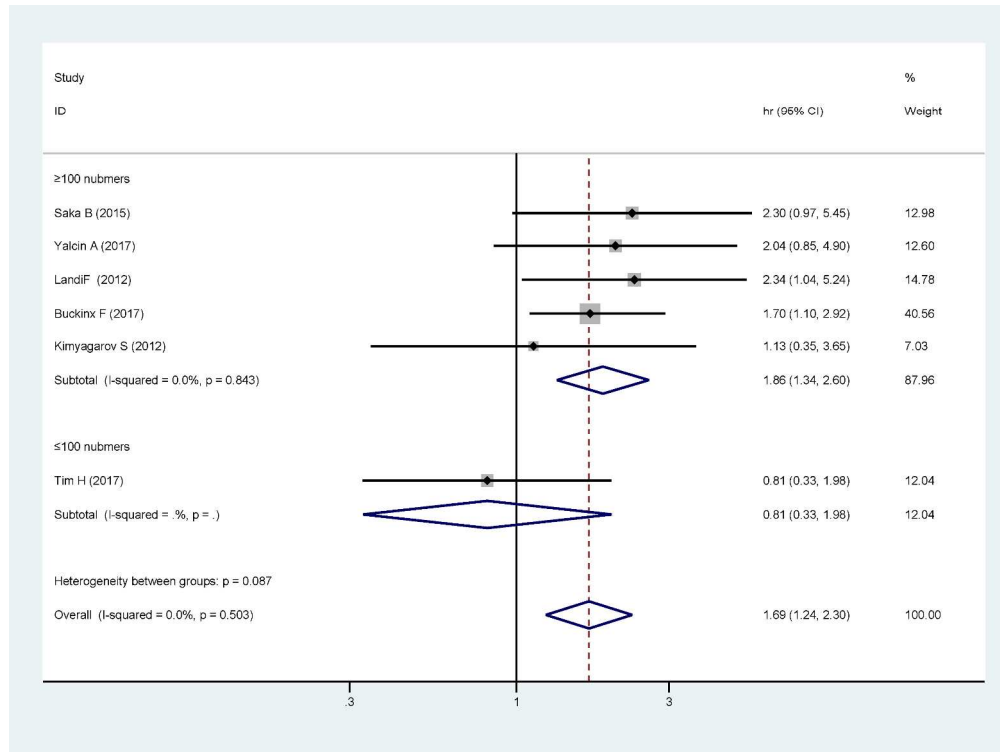

Figure 4. Subgroup analyses of the meta-analysis according to the sample size

275x207mm (300 x 300 DPI)

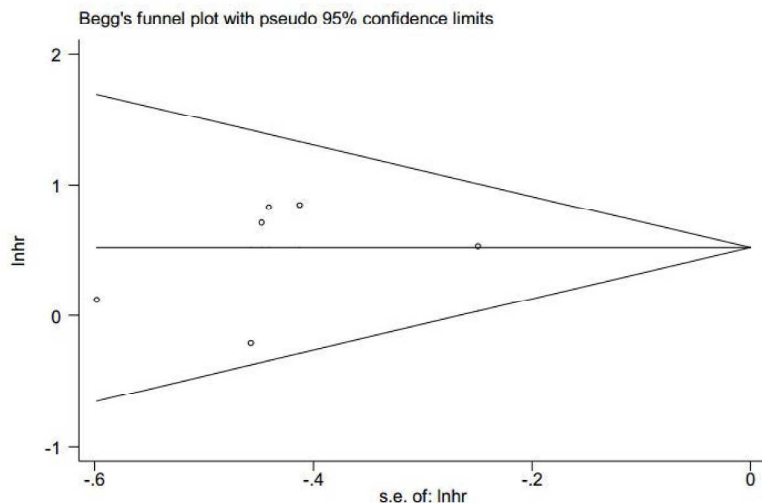

Figure 5. Funnel plot of sarcopenia and all-cause mortality among older nursing home residents

Figure 5. Funnel plot of sarcopenia and all-cause mortality among older nursing home residents

318x206mm (300 x 300 DPI)

view only

# BMJ Open

## Sarcopenia as a predictor of all-cause mortality among older nursing home residents: a systematic review and meta-analysis

|                                 |                                                                                                                                                                                                                                                                                                                                                                                                                                                                                                                                                                                                                                                                                                                                                                                                                                                                                      |
|---------------------------------|--------------------------------------------------------------------------------------------------------------------------------------------------------------------------------------------------------------------------------------------------------------------------------------------------------------------------------------------------------------------------------------------------------------------------------------------------------------------------------------------------------------------------------------------------------------------------------------------------------------------------------------------------------------------------------------------------------------------------------------------------------------------------------------------------------------------------------------------------------------------------------------|
| Journal:                        | <i>BMJ Open</i>                                                                                                                                                                                                                                                                                                                                                                                                                                                                                                                                                                                                                                                                                                                                                                                                                                                                      |
| Manuscript ID                   | bmjopen-2017-021252.R1                                                                                                                                                                                                                                                                                                                                                                                                                                                                                                                                                                                                                                                                                                                                                                                                                                                               |
| Article Type:                   | Research                                                                                                                                                                                                                                                                                                                                                                                                                                                                                                                                                                                                                                                                                                                                                                                                                                                                             |
| Date Submitted by the Author:   | 09-May-2018                                                                                                                                                                                                                                                                                                                                                                                                                                                                                                                                                                                                                                                                                                                                                                                                                                                                          |
| Complete List of Authors:       | Zhang, Xiaoming; Department of Emergency, the affiliated Baoan Hospital of Southern Medical University, People's hospital of Baoan ShenZhen<br>Wang, Conghua; Department of Emergency, the affiliated Baoan Hospital of Southern Medical University, People's hospital of Baoan ShenZhen<br>Dou, Qingli; Department of Emergency, the affiliated Baoan Hospital of Southern Medical University, People's hospital of Baoan ShenZhen<br>Zhang, Wenwu; Department of Emergency, the affiliated Baoan Hospital of Southern Medical University, People's hospital of Baoan ShenZhen<br>Yang, Yunzhi; Department of Nursing, the affiliated Baoan Hospital of Southern Medical University, People's hospital of Baoan ShenZhen,<br>Department of Nursing<br>Xie, Xiaohua; Department of Nursing, the affiliated hospital of ShenZhen University, the second people's hospital of ShenZhen |
| <b>Primary Subject Heading</b>: | Geriatric medicine                                                                                                                                                                                                                                                                                                                                                                                                                                                                                                                                                                                                                                                                                                                                                                                                                                                                   |
| Secondary Subject Heading:      | Geriatric medicine, Nursing                                                                                                                                                                                                                                                                                                                                                                                                                                                                                                                                                                                                                                                                                                                                                                                                                                                          |
| Keywords:                       | Sarcopenia, All-cause mortality, Nursing Home, Meta-analysis                                                                                                                                                                                                                                                                                                                                                                                                                                                                                                                                                                                                                                                                                                                                                                                                                         |
|                                 |                                                                                                                                                                                                                                                                                                                                                                                                                                                                                                                                                                                                                                                                                                                                                                                                                                                                                      |

SCHOLARONE™  
Manuscripts

1  
2  
3 **Sarcopenia as a predictor of all-cause mortality among older nursing home**  
4 **residents: a systematic review and meta-analysis**  
5

6 XiaomingZhang<sup>1†</sup>, ConghuaWang<sup>1†</sup>, QingliDou<sup>1</sup>, WenwuZhang<sup>1</sup>, Yunzhi Yang<sup>2\*</sup> Xiaohua  
7 Xie<sup>3</sup>  
8  
9

10 <sup>1</sup>Department of Emergency, the affiliated Baoan Hospital of Southern Medical  
11 University, People's hospital of Baoan ShenZhen  
12  
13

14 <sup>2</sup>Department of Nursing, the affiliated Baoan Hospital of Southern Medical  
15 University, People's hospital of Baoan ShenZhen  
16  
17

18 <sup>3</sup>Department of Nursing, the affiliated hospital of ShenZhen University, the second  
19 people's hospital of ShenZhen  
20  
21

22  
23 <sup>†</sup>Co-first authors  
24

25 <sup>\*</sup>Corresponding author  
26

27 Correspondence to: zjhkbcg@163.com. Mail Address: No. 118, longjing, Baoan  
28 District, Shenzhen 518101, China. Tel: +86- 1518135397.  
29  
30  
31  
32  
33  
34  
35  
36  
37  
38  
39  
40  
41  
42  
43  
44  
45  
46  
47  
48  
49  
50  
51  
52  
53  
54  
55  
56  
57  
58  
59  
60



## Abstract

**Objectives:** This study aims to review the evidence of sarcopenia as a predictor of all-cause mortality among nursing home residents.

**Design:** A systematic review and meta-analysis of cohort studies was performed according to the Preferred Reporting Items for Systematic Reviews and Meta-Analyses guidelines.

**Data sources:** PubMed, EMBASE, and the Cochrane Library databases were searched for relevant articles.

**Participants:** Nursing home residents.

**Primary and secondary outcome measures:** All-cause mortality

**Data analysis:** Summary-adjusted hazard ratios (HRs) or risk ratios (RRs) were calculated by fixed-effects model. The risk of bias was assessed by Newcastle-Ottawa Scale.

**Results:** Of 2292 studies identified through the systematic review, six studies (1494 participants) were included in the meta-analysis. Sarcopenia was significantly associated with a higher risk for all-cause mortality among nursing home residents (pooled HR=1.86, 95% confidence interval [95% CI] =1.42-2.45, P=0.000,  $I^2 =0$ ). In addition, the subgroup analysis for length of follow-up demonstrated that a follow-up period of 1 year or more of analysis was associated with all-cause mortality (pooled HR 1.87, [95%CI]=1.38- 2.52, p= p=0.00); however, this was not found with the follow-up period less than 1 year. Furthermore, sarcopenia was significantly associated with the risk of mortality among older nursing home residents when using bioelectrical impedance analysis to diagnosis muscle mass (pooled HR=1.88, 95% CI = 1.39- 2.53, p=0.00); whereas, it was not found with anthropometric measures to diagnosis muscle mass.

**Conclusion:** Sarcopenia is a significant predictor of all-cause mortality among older nursing home residents. Therefore, it is important to diagnose sarcopenia and to treat the condition to reduce mortality rates among nursing home residents.

**PROSPEERO registration number:** CRD42018081668

**Key words:** Sarcopenia; All-cause mortality; Nursing Home; Meta-analysis

### Strengths and limitations of this study

1. We used an extensive search process in an electronic database and assessed methodologic quality and tested the heterogeneity and publication bias among the included studies.
2. This systematic review and meta-analysis assessed the overall quality of the evidence using a Newcastle Ottawa Scale (NOS) approach for prospective observational studies and conducted a meta-analysis and subgroup analysis.
3. The pooled results showed good consistency (low between-study heterogeneity) because we used the same unified diagnostic criteria of sarcopenia and the same population (nursing home residents).
4. The studies included in this analysis were insufficient, and the size sample was relatively small.
5. Different cutoff values for the muscle mass might affect the relationship between sarcopenia and all-cause mortality.

## 1. Introduction

Sarcopenia is a common syndrome characterised by a loss of muscle mass and strength with functional impairment and adverse health outcomes due to cumulative deficits of multiple systems<sup>1</sup>. Nursing home residents are at a particularly high risk for sarcopenia<sup>2</sup>. According to studies, the prevalence of sarcopenia was 1-29% for community-dwelling older adults, 14-85.4% in nursing homes<sup>2-4</sup> and 10-24.3% for those in hospitals<sup>5</sup>. Sarcopenia leads to a worse outcome in elderly people, including physical disability, falls, fractures, poor quality of life, mortality and hospitalisation<sup>6-8</sup>. Among these, mortality might be considered the most important outcome in elderly people. So far, the relationship between mortality and operational criteria that define sarcopenia has been well described in community-dwelling older adults and hospitalised patients. A recent meta-analysis study, Liu<sup>9</sup> *et al.*, analysed sarcopenia and mortality and concluded that sarcopenia is a predictor of all-cause mortality among community-dwelling older people. However, there is no consistent conclusion

1  
2  
3 regarding the relationship between sarcopenia and mortality among nursing home  
4 residents. It has been shown that the mortality rate in nursing homes<sup>10</sup> is  
5 approximately 2-fold higher than that in the community<sup>11-13</sup>; therefore, it is very  
6 important to confirm the risk factors for mortality among nursing home residents.  
7  
8  
9

10 Several studies found that elderly people with sarcopenia were predictors of  
11 all-cause mortality among nursing home residents<sup>14, 15</sup>. However, some studies did  
12 not find any significant relationship between sarcopenia and all-cause mortality<sup>16-19</sup>.  
13 Given the observed contradictory relationship between sarcopenia and all-cause  
14 mortality among nursing home residents in some studies, further studies are needed.  
15 However, no systematic reviews of meta-analysis studies on this topic have been  
16 conducted in the literature. Therefore, our study aims to identify and compare  
17 prospective cohort studies examining sarcopenia as a predictor of all-cause mortality  
18 among nursing home residents according to the Preferred Reporting Items for  
19 Systematic Reviews and Meta-Analyses (PRISMA) guidelines.  
20  
21  
22  
23  
24  
25  
26  
27  
28

## 29 **2. Materials and methods**

30 This meta-analysis was registered with the international prospective Register for  
31 Systemic Reviews (CRD42018081668) and conducted according to the PRISMA  
32 guidelines<sup>20</sup>.  
33  
34  
35

### 36 **2.1. Search strategy and selection criteria**

37 A systematic literature search was conducted in MEDLINE (via PubMed 1946 to  
38 November 2017), EMBASE (via EMBASE November 2017) and Cochrane CENTRAL  
39 Library (via Cochrane Library November 2017). The search strategy was tailored  
40 according to each database. We used a combination of key words such as mortality  
41 (mortality\*), OR death (death\*), OR survival (survival\*) and sarcopenia (sarcopenia\*),  
42 as well as MeSH terms. We also used subject terms and truncation symbols in our  
43 search strategy. We searched the potential grey studies through Google Scholar.  
44 Furthermore, we carried out a manual search on the references of included studies.  
45 The full search strategy for three databases has been provided as a supplementary  
46 file.  
47  
48  
49  
50  
51  
52  
53  
54  
55

### 56 **2.2. Study selection**

1  
2  
3 These studies identified by our search strategy were reviewed by teams of two  
4 independently blinded reviewers (Zhang XM and Wang CH) who evaluated each title  
5 and abstract. In case of disagreement whether to include or exclude studies, the  
6 issue was discussed and a third reviewer evaluated the study until the reviewers  
7 reached consensus.  
8  
9

### 10 11 12 **2.3. Inclusion and exclusion criteria**

13  
14 The following eligibility and exclusion criteria were prespecified. Studies had to  
15 fulfil the following four inclusion criteria: (1) prospective cohort studies, (2) studies  
16 investigating whether sarcopenia was a predictor of mortality, (3) studies reporting  
17 clear diagnostic criteria for sarcopenia, (4) type of participant: elderly adult in nursing  
18 home or nursing care. Exclusion criteria were as follows: (1) Type of participant:  
19 community-dwelling older people (aged 65 years or older) or hospitalised older  
20 people; (2) article type: only abstract, letters and laboratory research; review articles;  
21 (3) insufficient data; (4) other languages of studies, except English; (5) no clear  
22 definition of sarcopenia.  
23  
24  
25  
26  
27  
28  
29

### 30 31 **2.4. Data extraction**

32  
33 Two investigators (Zhang XM, Wang CH) independently abstracted the data from  
34 the selected studies using a standardised data-abstraction form. The following  
35 information was extracted from included papers: author, country, year of publication,  
36 demographic characteristics of participants (e.g., sample size, male proportion),  
37 measurement methods of sarcopenia, follow-up period, Adjusted variable, and study  
38 quality. The reviewers cross-checked all extracted data. Disagreements were resolved  
39 by discussion until consensus was reached.  
40  
41  
42  
43  
44

### 45 46 **2.5. Patient and Public Involvement**

47 Our meta-analysis was based on secondary data; therefore, the ethical approval,  
48 patient consent or Public Involvement was not necessary.  
49

### 50 51 **2.6. Assessment of risk bias**

52  
53 Assessment of risk of bias was performed by two independent reviewers (Zhang  
54 XM, Wang CH) according to the Newcastle Ottawa Scale (NOS)<sup>21</sup>: (1)  
55 representativeness of the exposed cohort, (2) comparability of group, (3) blinding of  
56  
57  
58  
59

1  
2  
3 investigators who measured outcomes, (4) the time and completeness of follow-up,  
4 (5) contamination bias, and (6) other potential sources of bias. The total score of the  
5 scale is 9 points. When the total score is  $\geq 5$  points, it is considered a high-quality  
6 research.  
7  
8  
9

## 10 **2.7. Statistical analysis**

11  
12 The STATA version 14.0 (Stata Corp., College Station, TX, USA) was  
13 independently used for all analyses by two authors (Zhang XM, Dou QL). Hazard  
14 ratios (HRs), odds ratio (ORs) and their 95% CIs of mortality for sarcopenia compared  
15 with nonsarcopenia were extracted from studies for future meta-analysis. RR was  
16 considered equivalent to HR in our prospective cohort studies, which was reported in  
17 Carole Willi's<sup>22</sup> study and Ahmed N Mahmoud's study<sup>23</sup>. If a study reported the effect  
18 size as an OR, it was converted to RR using a previously described formula<sup>24</sup>.  
19 Subgroup analyses were conducted by different diagnosis tools for muscle mass and  
20 follow-up period if there was more than one study in the subgroup. The statistical  
21 heterogeneity among the included studies was examined with Cochran's Q statistic  
22 using chi-square and  $I^2$  statistics, and  $I^2$  value of 25%, 50% and 75% represented the  
23 cutoff of low, moderate and high heterogeneity, respectively. If heterogeneity was  
24 found to be reasonably high between studies, the random-effects model was used.  
25 Otherwise, the fixed-effects model was used. Results were illustrated using forest  
26 plots, and Begg's Test was done to plot the logHR against its standard error for  
27 assessment of potential publication bias.  
28  
29  
30  
31  
32  
33  
34  
35  
36  
37  
38  
39  
40  
41

## 42 **3. Results**

### 43 **3.1. Search results**

44  
45 The literature search strategy initially identified 2292 articles. After removal of  
46 duplicates, 1965 articles were screened for potential eligibility. A total of 85  
47 publications remained for further consideration. Then we screened titles and  
48 abstracts and removed unrelated articles. Of these articles, 30 were removed  
49 because of not cohort studies (e.g., review articles, conference documents,  
50 cross-sectional study, case-control study), and six were removed because they had no  
51 clear definition of sarcopenia; moreover, 41 were removed on account of different  
52  
53  
54  
55  
56  
57  
58  
59  
60

1  
2  
3 study population: community-dwelling older people, patients in hospital, and used  
4 the same cohorts (n = 2). These studies were screened according to the predefined  
5 inclusion and exclusion criteria for inclusion in the meta-analysis, resulting in a total  
6 of six eligible studies (Figure 1).  
7  
8  
9

### 10 **3.2 Included studies**

11  
12 Six prospective cohort studies were included in our meta-analysis with 1494  
13 total participants. Study characteristics of included papers are displayed in table 1.  
14 Two studies were conducted in Turkey<sup>25, 26</sup>, one study in Italy<sup>27-29</sup>, one study in  
15 Australia<sup>30</sup>, one study in Belgium and one study in Israel. All the studies selected  
16 all-cause mortality as the clinical outcome and used the sarcopenia criteria of the  
17 European Working Group for Sarcopenia (EWGSOP). The EWGSOP<sup>1</sup> recommends  
18 using the presence of both low muscle function (strength or performance) and low  
19 muscle mass for the diagnosis of sarcopenia. Thus, diagnosis of sarcopenia in the  
20 present study required the documentation of low muscle mass plus the  
21 documentation of either low muscle strength or low physical performance. The  
22 prevalence of sarcopenia ranged from 32.8 to 73.3%. The largest study consisted of  
23 662 men and women, and the smallest cohort had only 58 individuals. Follow-up  
24 periods were not longer varying from 6 months to 24 months, and the adjusted HR  
25 was displayed in four studies, and one used OR and the other used RR. Table 2 shows  
26 the different tools and cutoff of muscle mass, muscle strength and physical  
27 performance. Four studies used bioelectrical impedance analysis (BAI) as a diagnostic  
28 criterion for muscle mass, and the other two studies used anthropometric measures  
29 as diagnostic criteria.  
30  
31  
32  
33  
34  
35  
36  
37  
38  
39  
40  
41  
42  
43  
44

### 45 **3.3 Quality assessment**

46  
47 The methodologic quality evaluation using NOS of all items is shown in Table 3.  
48 The score of each study ranged from six to nine. The scores of five studies were more  
49 than seven.  
50  
51

### 52 **3.4 Sarcopenia as a predictor of mortality**

#### 53 **3.4.1 Meta-analysis of studies**

54  
55 Six studies examined the association between sarcopenia and mortality among  
56  
57  
58  
59  
60

1  
2  
3 nursing home residents. The pooled HRs values were calculated by fixed-effects  
4 models. As show in Figure 2, the HRs of all-cause mortality for sarcopenia versus  
5 nonsarcopenia was 1.86 (95%CI=1.42-2.45, P=0.001). No significant heterogeneity  
6 was observed across these studies (Q-value=4.82, degree of freedom=5, I<sup>2</sup>=0%,  
7 p=0.438).  
8  
9

### 10 11 12 3.4.2 Subgroup analysis 13

14 The six studies with HR of all-cause mortality risks for sarcopenia among nursing  
15 home residents were further analysed by subgroup. Figure 3 compares all-cause  
16 mortality risk stratified by length of follow-up for sarcopeina. Two studies with a  
17 follow-up period less than 1 year for sarcopenia (pooled HR 1.85, 95%CI 0.95–3.60,  
18 p=0.070); whereas the analysis of other four studies had a follow-up period of 1 year  
19 or more (pooled HR 1.87,95%CI 1.38-2.52, p=0.00). Figure 4 shows sarcopenia was  
20 significantly associated with the risk of morbidity among nursing home residents  
21 when using BIA to diagnose muscle mass (pooled effect size=1.88,95% CI =1.39-  
22 2.53,p=0.00), whereas it was not associated when using anthropometric measures to  
23 diagnosis muscle mass (pooled effect size=1.79,95% CI=0.89-3.59,p=0.10).  
24  
25  
26  
27  
28  
29  
30  
31

### 32 3.4.3 Publication bias assessment 33

34 There was no significant publication bias among the studies using Begg's test:  
35 P=0.386 (Figure 5).  
36  
37  
38  
39

## 40 4. Discussion

41 In this meta-analysis, we found evidence suggesting the risk of all-cause  
42 mortality among nursing home residents with sarcopenia was higher than that  
43 among nursing home residents without sarcopenia. To the best of our knowledge,  
44 this is the first meta-analysis to explore the relationship between sarcopenia and  
45 all-cause mortality among nursing home residents. Our study indicated assessing  
46 sarcopenia is really important among the elderly that live in nursing homes.  
47  
48  
49  
50  
51

52 Ping Liu<sup>9</sup> *et al.* implemented a systematic review and meta-analysis regarding  
53 the association of sarcopenia with mortality in 2016, published in 2017. However,  
54 this review included a population entirely of community-dwelling older people. So far,  
55  
56  
57  
58  
59

1  
2  
3 Shu-Fang Chang<sup>31</sup> and Beaudart<sup>32</sup> both performed a systematic review to evaluate  
4 the link between sarcopenia and all-cause mortality; however, there were some  
5 methodologic shortcomings, such as various diagnostic criteria of sarcopenia, crude  
6 ORs as effect, various population involving community-dwelling older people and  
7 hospitalised patients. Although a subgroup of nursing home residents was analysed  
8 in Beaudart's study, there is only two studies that was assessed, which maybe  
9 underestimated or overestimated their result. Our review included six studies which  
10 focus only on the association of mortality and sarcopenia in nursing home residents.  
11 We adopted the same diagnostic criteria of sarcopenia (EWGSOP) and the same type  
12 of population (nursing home residents) to decrease clinical heterogeneity.  
13  
14  
15  
16  
17  
18  
19  
20

21 This meta-analysis of six cohort studies shows sarcopenia is an important  
22 predictor of all-cause mortality among nursing home residents. The pooled HR value  
23 of all-cause mortality was 1.86 (95%CI=1.41-2.45, P=0.000, I<sup>2</sup> = 0%). The perfect I<sup>2</sup>  
24 suggesting no significant heterogeneity was shown across these research. In addition,  
25 our study's pooled HR value is higher than that of Ping Liu (1.60 95%CI: 1.24–2.06 );  
26 the primary reason was the different type of population. Those living in a nursing  
27 home usually had worse health conditions and more comorbidities, more disability  
28 and more geriatric syndromes, such as cognitive dysfunction and malnutrition<sup>17, 33-35</sup>.  
29 This comprehensive risk factor may aggravate the process of sarcopenia.  
30  
31  
32  
33  
34  
35  
36  
37

38 The prevalence of sarcopenia was 32.8-73.3%, which is higher than that in other  
39 studies. The difference was mainly due to the mean age, various population and  
40 different diagnostic tools, particularly the ways researchers measured muscle mass.  
41 Sarcopenia was associated with all-cause mortality when using BIA to diagnose  
42 muscle mass; whereas it was not associated when using anthropometric measures to  
43 diagnose muscle mass. According to the EWGSOP<sup>1</sup>, BIA is the most common tool for  
44 diagnosing muscle mass; moreover, the test is inexpensive, easy to use, readily  
45 reproducible and appropriate for both ambulatory and bedridden patients, which  
46 may be considered a portable alternative toDXA (Dual Energy X-ray Absorptiometry)  
47 in nursing homes. However, the method of anthropometric measures was based on  
48 mid-upper-arm circumference and skin fold thickness<sup>36</sup>; therefore, age-related  
49  
50  
51  
52  
53  
54  
55  
56  
57  
58  
59  
60



1  
2  
3 changes in fat deposits and loss of skin elasticity contribute to errors of estimation in  
4 older nursing home residents, which are prone to produce errors<sup>37</sup>. Furthermore,  
5 anthropometric measures were not recommended for routine use in the diagnosis of  
6 sarcopenia. The subgroup of length of follow-up analysis demonstrated that  
7 follow-up period of 1 year or more of analysis was associated with all-cause mortality  
8 (pooled HR=1.87,95%CI 1.38-2.52, p=0.000); however, this was not found with the  
9 follow-up period of less than 1 year. The reason may be, with the time of aging,  
10 sarcopenia will aggravatingly impact patient survival, which may increase the  
11 mortality rates.  
12  
13  
14  
15  
16  
17  
18  
19

20 The underlying mechanisms between sarcopenia and a higher risk of all-cause  
21 mortality did not have a conclusion; some aspects should be mentioned at least.  
22 Firstly, the association between sarcopenia and mortality may be explained by the  
23 hypothesised adverse effects of a low muscle mass in older people. Several studies  
24 showed that low muscle mass is highly associated with increased mortality<sup>38-40</sup>. In  
25 addition, elderly people in nursing homes are at high risk of malnutrition<sup>41</sup>, which  
26 aggravates low muscle mass, resulting in an increased mortality rate. Secondly,  
27 sarcopenia is linked to multiple factors ranging from aging process<sup>42</sup>, multiple chronic  
28 health conditions, unhealthy lifestyle<sup>43</sup>, hormonal factors<sup>44</sup>, inflammation<sup>45</sup> and so  
29 on<sup>46</sup>. Meanwhile, the above factors are consider linked to mortality and the  
30 development of multifactor worsened the situation of sarcopenia, leading to a  
31 passive adaption to adversity or external stressors, which in turn generate increased  
32 poor adverse outcomes<sup>47</sup>. Thirdly, according to the study of Fried<sup>48</sup> *et al.*, sarcopenia  
33 played a critical etiologic role in the frailty process, which is related, through frailty,  
34 to pernicious consequences—for instance, recurrent falls, bone fracture, disability,  
35 multiple emergency room visits and hospital admissions and eventually death<sup>49, 50</sup>.  
36 Moreover, sarcopenia is considered to increase the risk of falls among the elderly<sup>51</sup>,  
37 and falls were the major causes of death in nursing home residents<sup>52</sup>. Sarcopenia is a  
38 geriatric syndrome rather than a disease; the mechanism of sarcopenia must be  
39 complex, which needs more research to explore.  
40  
41  
42  
43  
44  
45  
46  
47  
48  
49  
50  
51  
52  
53  
54  
55

56 Our meta-analysis review has multiple strengths and some limitations. One

1  
2  
3 strength is we used an extensive search process in electronic databases and assessed  
4 methodologic quality and tested the heterogeneity and publication bias among the  
5 included studies. Another strength was using the same unified diagnostic criteria of  
6 sarcopenia (EWGSOP) and the same population (nursing home residents) to reduce  
7 heterogeneity and improve the research quality. Our study had some limitations.  
8 Firstly, few included studies did not present the same confounding factors that were  
9 incorporated into the meta-analyses, which underestimated or overestimated our  
10 results. Especially, the Mini-Nutritional Assessment that was not included in two  
11 studies. However, malnutrition is very high among nursing home residents<sup>41</sup>. A study  
12 has shown that malnutrition is a risk for mortality among nursing home residents<sup>17</sup>.  
13 Another concern was that the cutoff for the muscle mass was different in some  
14 studies, which will cause the prevalence of Sarcopenia to be various, thus potentially  
15 influencing the result. The studies included in this analysis were insufficient, and the  
16 sample size was relatively small. Thirdly, the language of studies was limited to  
17 English, and consequently we may have missing data from important studies  
18 published in other languages, which may result in potential language bias. In addition,  
19 the follow-up was relatively short for the necessary latency, which may  
20 underestimate the results.  
21  
22  
23  
24  
25  
26  
27  
28  
29  
30  
31  
32  
33  
34  
35

## 36 **5. Conclusion**

37  
38 This study provides evidence that sarcopenia is a significant predictor of  
39 all-cause mortality among nursing home residents based on the comprehensive  
40 systematic review and meta-analysis. Further studies are needed to provide evidence  
41 for specific interventions to prevent and treat sarcopenia, which can reduce mortality  
42 in people living in a nursing home.  
43  
44  
45  
46

## 47 **6. Acknowledgements**

48  
49 The authors thank the staffs of the Department of Emergency Medicine,  
50 people's hospital of Baoan ShenZhen for their guidance and support.  
51  
52

## 53 **7. Financial Support**

1  
2  
3 This research received no specific grant from any funding agency, commercial or  
4 not-for-profit sectors. No sponsors had any role in the design, methods, subject  
5 recruitment, data collections, analysis or preparation of this manuscript.  
6  
7

### 8 **8. Contributors**

9  
10 Xiaoming Zhang was responsible for producing the initial draft of the manuscript.

11  
12 Conghua Wang was responsible for data extraction and for producing the initial draft  
13 of the manuscript.  
14

15  
16 Qingli Dou was responsible for data extraction.

17  
18 Wenwu Zhang was responsible for screening the papers and quality assessment.

19  
20 Xiaohua Xiewas responsible for screening the papers.

21  
22 Yunzhi Yang was responsible for quality assessment, statistical analysis and revision  
23 of the manuscript.  
24

25 All the authors approved the final version of the manuscript  
26

### 27 **9. Conflict of Interest**

28  
29 None of the authors have any conflict of interest to declare.  
30

### 31 **10. Data Sharing Statements**

32 All the data can be found in the electronic databases (PubMed, EMBASE, and  
33 the Cochrane Library).  
34  
35

### 36 **References**

- 37  
38 1. Cruz-Jentoft AJ, Baeyens JP, Bauer JM, et al. Sarcopenia: European consensus on definition  
39 and diagnosis: Report of the european working group on sarcopenia in older people. *Age and*  
40 *Ageing* 2010;39:412-423.  
41  
42 2. Landi F, Liperoti R, Fusco D, et al. Prevalence and risk factors of sarcopenia among nursing  
43 home older residents. *The journals of gerontology. Series A, Biological Sciences and Medical*  
44 *Sciences* 2012;67:48-55.  
45  
46 3. Bahat G, Saka B, Tufan F, et al. Prevalence of sarcopenia and its association with functional  
47 and nutritional status among male residents in a nursing home in turkey. *Aging Male*  
48 2010;13:211-214.  
49  
50 4. Senior HE, Henwood TR, Beller EM, et al. Prevalence and risk factors of sarcopenia among  
51 adults living in nursing homes. *Maturitas* 2015;82:418-423.  
52  
53 5. Cruz-Jentoft AJ, Landi F, Schneider SM, et al. Prevalence of and interventions for sarcopenia in  
54 ageing adults: A systematic review. Report of the international sarcopenia initiative (ewgso  
55 and iwgs). *Age and Ageing* 2014;43:748-759.  
56  
57 6. Beaudart C, McCloskey E, Bruyere O, et al. Sarcopenia in daily practice: Assessment and  
58 management. *BMC Geriatr* 2016;16:170.  
59  
60

7. Woo J. Sarcopenia. *Clin Geriatr Med* 2017;33:305-314.
8. Landi F, Liperoti R, Russo A, et al. Sarcopenia as a risk factor for falls in elderly individuals: Results from the ilsirente study. *Clinical nutrition (Edinburgh, Scotland)* 2012;31:652-658.
9. Liu P, Hao Q, Hai S, et al. Sarcopenia as a predictor of all-cause mortality among community-dwelling older people: A systematic review and meta-analysis. *Maturitas* 2017;103:16-22.
10. Goldberg TH, Botero A. Causes of death in elderly nursing home residents. *Journal of the American Medical Directors Association* 2008;9:565-567.
11. Kim JH, Lim S, Choi SH, et al. Sarcopenia: An independent predictor of mortality in community-dwelling older korean men. *The journals of gerontology. Series A, Biological Sciences and Medical Sciences* 2014;69:1244-1252.
12. Wauters M, Elseviers M, Vaes B, et al. Mortality, hospitalisation, institutionalisation in community-dwelling oldest old: The impact of medication. *Archives Of Gerontology And Geriatrics* 2016;65:9-16.
13. Arango-Lopera VE, Arroyo P, Gutierrez-Robledo LM, et al. Mortality as an adverse outcome of sarcopenia. *The Journal of Nutrition, Health & Aging* 2013;17:259-262.
14. Buckinx F, Croisier JL, Reginster JY, et al. Prediction of the incidence of falls and deaths among elderly nursing home residents: The senior study. *Journal of the American Medical Directors Association* 2017;1-7.
15. Landi F, Liperoti R, Fusco D, Mastropaolo S, et al. Sarcopenia and mortality among older nursing home residents. *Journal of the American Medical Directors Association* 2012;13:121-126.
16. Henwood T, Hassan B, Swinton P, et al. Consequences of sarcopenia among nursing home residents at long-term follow-up. *Geriatric Nursing (New York, N.Y.)* 2017;38:406-411.
17. Saka B, Ozkaya H, Karisik E, et al. Malnutrition and sarcopenia are associated with increased mortality rate in nursing home residents: A prospective study. *European Geriatric Medicine* 2016;7:232-238.
18. Yalcin A, Aras S, Atmis V, et al. Sarcopenia and mortality in older people living in a nursing home in turkey. *Geriatrics and Gerontology International* 2017;17:1118-1124.
19. Kimyagarov S, Klid R, Fleissig Y, et al. Skeletal muscle mass abnormalities are associated with survival rates of institutionalized elderly nursing home residents. *The Journal of Nutrition, Health & Aging* 2012;16:432-436.
20. Moher D, Liberati A, Tetzlaff J, et al. Preferred reporting items for systematic reviews and meta-analyses: The prisma statement. *International Journal Of Surgery (London, England)* 2010;8:336-341.
21. Stang A. Critical evaluation of the newcastle-ottawa scale for the assessment of the quality of nonrandomized studies in meta-analyses. *European journal of epidemiology* 2010;25:603-605.
22. Willi C, Bodenmann P, Ghali WA, et al. Active smoking and the risk of type 2 diabetes: A systematic review and meta-analysis. *JAMA* 2007;298:2654-2664.
23. Mahmoud AN, Mentias A, Elgendy AY, et al. Migraine and the risk of cardiovascular and cerebrovascular events: A meta-analysis of 16 cohort studies including 1 152 407 subjects. *BMJ OPEN* 2018;8:e020498.
24. Grant RL. Converting an odds ratio to a range of plausible relative risks for better

- communication of research findings. *BMJ (Clinical research ed.)* 2014;348:f7450.
25. Chalhoub D, Cawthon P, Ensrud K, et al. Risk of non-spine fractures among men and women with sarcopenia, low bone mass or both. *Journal of Bone and Mineral Research* 2013;28.
26. Cawthon PM, Blackwell TL, Cauley J, et al. Evaluation of the usefulness of consensus definitions of sarcopenia in older men: Results from the observational osteoporotic fractures in men cohort study. *Journal of the American Geriatrics Society* 2015;63:2247-2259.
27. Scott D, Seibel M, Cumming R, et al. Sarcopenic obesity and its temporal associations with changes in bone mineral density, incident falls, and fractures in older men: The concord health and ageing in men project. *Journal of Bone and Mineral Research* 2017;32:575-583.
28. Scott D, Chandrasekara SD, Laslett LL, et al. Associations of sarcopenic obesity and dynapenic obesity with bone mineral density and incident fractures over 5–10 years in community-dwelling older adults. *Calcified Tissue International* 2016;99:30-42.
29. Yu R, Leung J, Woo J. Incremental predictive value of sarcopenia for incident fracture in an elderly chinese cohort: Results from the osteoporotic fractures in men (mros) study. *Journal of the American Medical Directors Association* 2014;15:551-558.
30. Hars M, Biver E, Chevalley T, et al. Low lean mass predicts incident fractures independently from frax: A prospective cohort study of recent retirees. *Journal of Bone and Mineral Research* 2016;31:2048-2056.
31. Chang SF, Lin PL. Systematic literature review and meta-analysis of the association of sarcopenia with mortality. *Worldviews On Evidence-Based Nursing* 2016;13:153-162.
32. Beaudart C, Zaaria M, Pasleau F, et al. Health outcomes of sarcopenia: A systematic review and meta-analysis. *PloS One* 2017;12:e0169548.
33. Hoffmann F, Kaduszkiewicz H, Glaeske G, et al. Prevalence of dementia in nursing home and community-dwelling older adults in germany. *Aging clinical and experimental research* 2014;26:555-559.
34. Ronald LA, McGregor MJ, McGrail KM, et al. Hospitalization rates of nursing home residents and community-dwelling seniors in british columbia. *Canadian Journal On Aging = La revue canadienne du vieillissement* 2008;27:109-115.
35. Benzinger P, Becker C, Kerse N, et al. Pelvic fracture rates in community-living people with and without disability and in residents of nursing homes. *Journal Of The American Medical Directors Association* 2013;14:673-678.
36. Rolland Y, Lauwers-Cances V, Cournot M, et al. Sarcopenia, calf circumference, and physical function of elderly women: A cross-sectional study. *Journal Of the American Geriatrics Society* 2003;51:1120-1124.
37. Rolland Y, Czerwinski S, Abellan Van Kan G, et al. Sarcopenia: Its assessment, etiology, pathogenesis, consequences and future perspectives. *The Journal Of Nutrition, Health & Aging* 2008;12:433-450.
38. Brown JC, Harhay MO, Harhay MN, et al. Appendicular lean mass and mortality among prefrail and frail older adults. *The Journal Of Nutrition, Health & Aging* 2017;21:342-345.
39. Cesari M, Pahor M, Lauretani F, et al. Skeletal muscle and mortality results from the inchianti study. *The Journals of Gerontology. Series A, Biological Sciences and Medical Sciences* 2009;64:377-384.
40. Wijnhoven HA, van Bokhorst-de van der Schueren MA, Heymans MW, et al. Low mid-upper arm circumference, calf circumference, and body mass index and mortality in older persons.

- 1  
2  
3 *The Journals Of Gerontology. Series A, Biological Sciences and Medical Sciences*  
4 2010;65:1107-1114.
- 5 41. Vandewoude MF, Alish CJ, Sauer AC, et al. Malnutrition-sarcopenia syndrome: Is this the  
6 future of nutrition screening and assessment for older adults? *J Aging Res*  
7 2012;2012:651570.
- 8 42. Marzetti E, Lees HA, Wohlgemuth SE, et al. Sarcopenia of aging: Underlying cellular  
9 mechanisms and protection by calorie restriction. *BioFactors (Oxford, England)*  
10 2009;35:28-35.
- 11 43. Cruz-Jentoft AJ, Kiesswetter E, Drey M, et al. Nutrition, frailty, and sarcopenia. *Aging Clin Exp*  
12 *Res* 2017;29:43-48.
- 13 44. Martone AM, Lattanzio F, Abbatecola AM, et al. Treating sarcopenia in older and oldest old.  
14 *Curr Pharm Des* 2015;21:1715-1722.
- 15 45. Westbury LD, Fuggle NR, Syddall HE, et al. Relationships between markers of inflammation  
16 and muscle mass, strength and function: Findings from the hertfordshire cohort study. *Calcif*  
17 *Tissue Int* 2017;102(3):287-295.
- 18 46. Malafarina V, Úriz-Otano F, Iniesta R, et al. Sarcopenia in the elderly: Diagnosis,  
19 physiopathology and treatment. *Maturitas* 2012;71:109-114.
- 20 47. Cruz-Jentoft AJ, Landi F, Topinkova E, et al. Understanding sarcopenia as a geriatric syndrome.  
21 *Curr Opin Clin Nutr Metab Care* 2010;13:1-7.
- 22 48. Fried LP, Tangen CM, Walston J, et al. Frailty in older adults: Evidence for a phenotype. *The*  
23 *journals of gerontology. Series A, Biological sciences and medical sciences* 2001;56:M146-156.
- 24 49. Wick JY. Understanding frailty in the geriatric population. *The Consultant pharmacist : the*  
25 *Journal Of The American Society of Consultant Pharmacists* 2011;26:634-645.
- 26 50. Bernabei R, Martone AM, Vetrano DL, et al. Frailty, physical frailty, sarcopenia: A new  
27 conceptual model. *Studies In Health Technology And Informatics* 2014;203:78-84.
- 28 51. Matsumoto H, Tanimura C. Sarcopenia is a risk factor for falling in independently living  
29 japanese older adults: A 2-year prospective cohort study of the gaina study. *Geriatr Gerontol*  
30 *Int* 2017;17:2124-2130.
- 31 52. Ibrahim JE, Bugeja L, Willoughby M, et al. Premature deaths of nursing home residents: An  
32 epidemiological analysis. *The Medical Journal Of Australia* 2017;206:442-447.
- 33  
34  
35  
36  
37  
38  
39  
40  
41  
42  
43  
44  
45  
46  
47  
48  
49  
50  
51  
52  
53  
54  
55  
56  
57  
58  
59  
60

Table 1 Summary of Included Studies on Sarcopenia Associated with All-cause Mortality

| Author       | Country   | Year | Male  | Sample number | Age of patients, years | Sarcopenia Criteria | Prevalence% | Follow-up period | Outcome             | Effect Measure | Adjusted or Crude HR/OR | Quality* |
|--------------|-----------|------|-------|---------------|------------------------|---------------------|-------------|------------------|---------------------|----------------|-------------------------|----------|
| Saka B       | Turkey    | 2015 | 51%   | 402           | 78.0±7.9               | EWGSOP              | 73.3        | 12 months        | All-cause mortality | HR             | Adjusted                | 8        |
| Yalcin A     | Turkey    | 2017 | 54.3% | 141           | 79.17±7.99             | EWGSOP              | 53.9        | 24 months        | All-cause mortality | HR             | 1-3,6,12,14,29-34       | 7        |
| Landi F      | Italy     | 2012 | 25%   | 122           | 84.1±4.8               | EWGSOP              | 32.8        | 6 months         | All-cause mortality | HRs            | 1,2,29,30-32            | 8        |
| Henwood T    | Australia | 2017 | 29.3% | 58            | 85.7±8.2               | EWGSOP              | 51.7        | 18 months        | All-cause mortality | RR             | 1-3,14,28               | 6        |
| Buckinx F    | Belgium   | 2017 | 27.5% | 662           | 83.2±8.99              | EWGSOP              | 36.2        | 12 months        | All-cause mortality | OR             | 1-27                    | 7        |
| Kimyagarov S | Israel    | 2012 | 41.2% | 109           | 84.9±7.4               | EWGSO               | 40.3        | 12 months        | All-cause mortality | HR             | 1-3,35                  | 7        |

1  
2  
3  
4  
5  
6  
7  
8  
9  
10  
11  
12  
13  
14  
15  
16  
17  
18  
19  
20  
21  
22  
23  
24  
25  
26  
27  
28  
29  
30  
31  
32  
33  
34  
35  
36  
37  
38  
39  
40  
41  
42  
43  
44  
45  
46  
47

EWGSOP(European Working Group for Sarcopenia in Older Persons) defines sarcopenia in men as ALM adjusted for height squared <7.25 kg/m<sup>2</sup> combined with low hand-grip strength (<30 kg) and/or low gait speed(<0.8 m/s).

Quality\* of the studies were assessed with Newcastle-Ottawa Scale(NOS);  
(1)Age; (2)sex; (3) BMI; (4) Frailty; (5) Waist circumference;(6) Calf circumference; (7) Arm circumference; (8) Wrist circumference;(9)Walking support; (10) Drugs consumed; (11) Medical history; (12); MMSE: Mini-Mental State Examination; (13) Minnesota (14) MNA, Mini-Nutritional Assessment;(15) Body fat; (16) SF-36; (17) EuroQol five dimensions; (18) EuroQol-Visual Analogue Scale; (19); Katz score;(20) Fear of falling; (21) Tinetti test; (22) TUG test; (23) SPPB test; (24) Gait speed; (25) Grip strength; (26) Peak expiratory flow; (27) Isometric strength; (28) physical activity; (29) cerebrovascular diseases; (30) osteoarthritis; (31) chronic obstructive pulmonary disease; (32)activity of daily living impairment; (33 )Diabetes; (34) Dementia; (35) Charlson comorbidity index

Table2 Study and Sarcopenia criteria

| study          | Sarcopenia criteria | Item,tool, Cutoff points | Muscle mass                                                          | Muscle strength    | Physical performance           | Ref                                      |              |    |
|----------------|---------------------|--------------------------|----------------------------------------------------------------------|--------------------|--------------------------------|------------------------------------------|--------------|----|
|                |                     | Tool                     | Cutoff points                                                        | Tool               | Cutoff points                  | Tool                                     | Cutoff point |    |
| Yalcin A 2017  | EWFSOP              | BIA                      | Men:SMI ≤8.87Kg/m <sup>2</sup><br>Women:SMI ≤6.42Kg/m <sup>2</sup>   | handgrip strength  | Men:HGS<30Kg<br>Women:HGS<20Kg | Gait speed: 4-m                          | ≤ 0.8 m/s    | 18 |
| Buckinx F 2017 | EWFSOP              | BIA                      | Men:SMI ≤8.87Kg/m <sup>2</sup><br>Women:SMI ≤6.42Kg/m <sup>2</sup>   | Handgrip strength  | None                           | SPPB: Short Physical Performance Battery | SPPB≤8       | 14 |
| Henwood T      | EWFSOP              | BIA                      | Men:SMI <8.87 kg/m <sup>2</sup><br>Women:SMI <6.42 kg/m <sup>2</sup> | hand grip Strength | Men:HGS<30Kg<br>Women:HGS<20Kg | SPPB: Short Physical Performance Battery | ≤ 0.8 m/s    | 16 |



|              |        |                         |                                                                              |                       |                                |                 |           |    |
|--------------|--------|-------------------------|------------------------------------------------------------------------------|-----------------------|--------------------------------|-----------------|-----------|----|
| Saka B       | EWFSOP | anthropometric measures | CC<31cm in men and women<br>MuAMC < 23.8cm in men<br>MUAMC < 23.3cm in women | hand grip Strength    | Men:HGS<30Kg<br>Women:HGS<20Kg | Gait speed: 4-m | ≤ 0.8 m/s | 17 |
| Kimyagarov S | EWFSOP | anthropometric measures | Men:SMI <8.50 kg/m <sup>2</sup><br>Women:SMI <5.75 kg/m <sup>2</sup>         | manual muscle testing | None                           | None            | None      | 19 |
| Landi F      | EWFSOP | BIA                     | Men:SMI <8.87 kg/m <sup>2</sup><br>Women:SMI <6.42 kg/m <sup>2</sup>         | hand grip Strength    | Men:HGS<30Kg<br>Women:HGS<20Kg | Gait speed: 4-m | ≤ 0.8 m/s | 15 |

Table 3  
Result of the Newcastle-Ottawa scale quality assessment

| Newcastle-Ottawa scale |                                                                    | Saka B 2015 | Yalcin A 2017 | Landi F 2012 | Kimyagarov S 2012 | Henwood T 2017 | Buckinx F 2017 |
|------------------------|--------------------------------------------------------------------|-------------|---------------|--------------|-------------------|----------------|----------------|
| Selection(4)           | Representativeness of the exposed cohort                           | 1           | 1             | 1            | 1                 | 1              | 1              |
|                        | Selection of the non-exposed cohort                                | 1           | 1             | 1            | 1                 | 1              | 1              |
|                        | Ascertainment of exposure                                          | 1           | 1             | 1            | 1                 | 1              | 1              |
|                        | Demonstration that outcome of interest was not present at start of | 1           | 1             | 1            | 1                 | 1              | 1              |

1  
2  
3  
4  
5  
6  
7  
8  
9  
10  
11  
12  
13  
14  
15  
16  
17  
18  
19  
20  
21  
22  
23  
24  
25  
26  
27  
28  
29  
30  
31  
32  
33  
34  
35  
36  
37  
38  
39  
40  
41  
42  
43  
44  
45  
46  
47

|                  |                                                                 |   |   |   |   |   |   |
|------------------|-----------------------------------------------------------------|---|---|---|---|---|---|
|                  | study                                                           |   |   |   |   |   |   |
| Comparability(2) | Comparability of cohorts on the basis of the design or analysis | 2 | 1 | 2 | 1 | 1 | 2 |
| Outcome(3)       | Assessment of outcome                                           | 1 | 1 | 1 | 1 | 1 | 1 |
|                  | Was follow-up long enough for outcome to occur                  | 0 | 0 | 0 | 0 | 0 | 0 |
|                  | Adequacy of follow up of cohorts                                | 1 | 1 | 1 | 1 | 1 | 1 |
| Quality(9)       | Total                                                           | 8 | 7 | 8 | 7 | 6 | 7 |

For peer review only

1  
2  
3 Figure 1. The flow diagram of studies selection.

4 Figure 2. Meta-analysis of the association between sarcopenia and mortality among older  
5 nursing home residents.

6 Figure 3. Subgroup analyses of the meta-analysis according to length of follow-up.

7  
8 Figure 4. Subgroup analyses of the meta-analysis according to different diagnosis tools for muscle  
9 mass.

10 Figure 5. Funnel plot of sarcopenia and all-cause mortality among older nursing home residents.  
11  
12  
13  
14  
15  
16  
17  
18  
19  
20  
21  
22  
23  
24  
25  
26  
27  
28  
29  
30  
31  
32  
33  
34  
35  
36  
37  
38  
39  
40  
41  
42  
43  
44  
45  
46  
47  
48  
49  
50  
51  
52  
53  
54  
55  
56  
57  
58  
59  
60

For peer review only

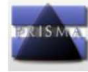

Figure 1. The flow diagram of studies selection.

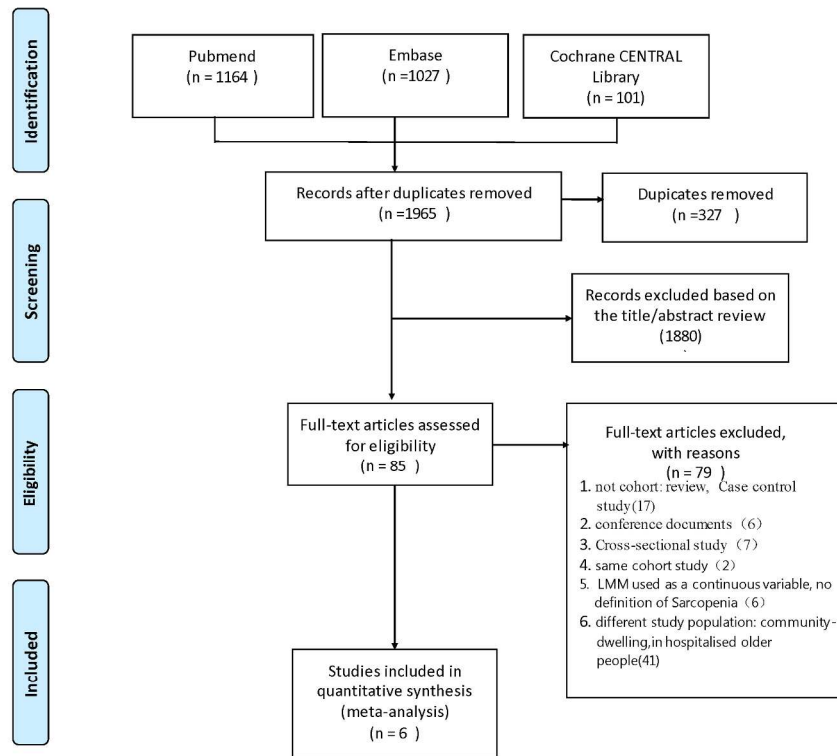

From: Moher D, Liberati A, Tetzlaff J, Altman DG, The PRISMA Group (2009). Preferred Reporting Items for Systematic Reviews and Meta-Analyses: The PRISMA Statement. PLoS Med 6(6): e1000097. doi:10.1371/journal.pmed1000097

For more information, visit [www.prisma-statement.org](http://www.prisma-statement.org).

Figure 1. The flow diagram of studies selection.

215x279mm (300 x 300 DPI)

1  
2  
3  
4  
5  
6  
7  
8  
9  
10  
11  
12  
13  
14  
15  
16  
17  
18  
19  
20  
21  
22  
23  
24  
25  
26  
27  
28  
29  
30  
31  
32  
33  
34  
35  
36  
37  
38  
39  
40  
41  
42  
43  
44  
45  
46  
47  
48  
49  
50  
51  
52  
53  
54  
55  
56  
57  
58  
59  
60

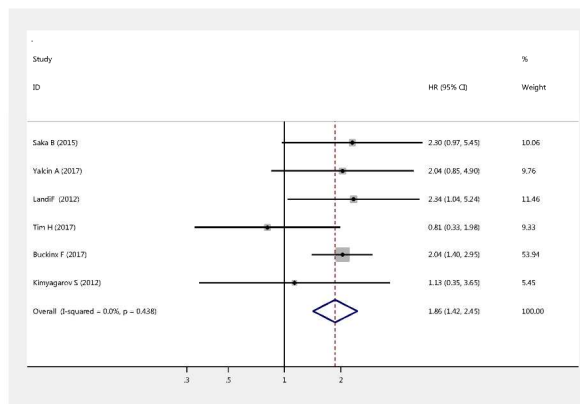

Figure 2. Meta-analysis of the association between sarcopenia and mortality among older nursing home residents.

Figure 2. Meta-analysis of the association between sarcopenia and mortality among older nursing home residents.

210x297mm (300 x 300 DPI)

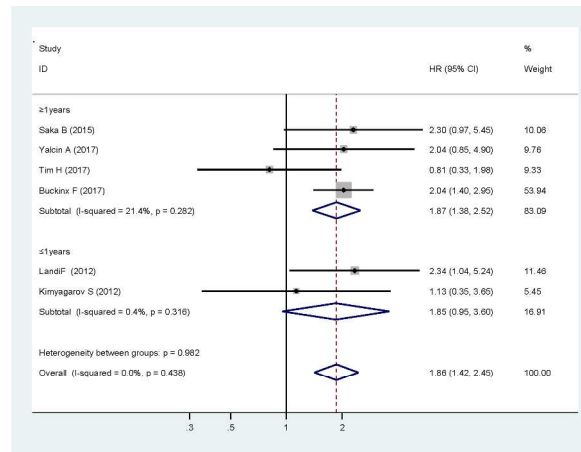

Figure 3. Subgroup analyses of the meta-analysis according to length of follow-up

Subgroup analyses of the meta-analysis according to length of follow-up.

210x297mm (300 x 300 DPI)

1  
2  
3  
4  
5  
6  
7  
8  
9  
10  
11  
12  
13  
14  
15  
16  
17  
18  
19  
20  
21  
22  
23  
24  
25  
26  
27  
28  
29  
30  
31  
32  
33  
34  
35  
36  
37  
38  
39  
40  
41  
42  
43  
44  
45  
46  
47  
48  
49  
50  
51  
52  
53  
54  
55  
56  
57  
58  
59  
60

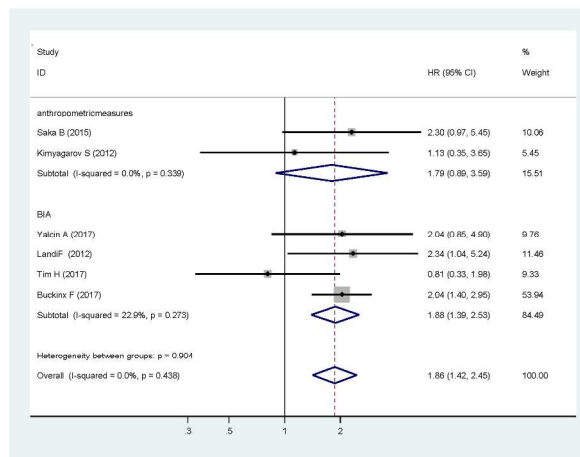

Figure 4: Subgroup analyses of the meta-analysis according to different diagnosis tools for muscle mass.

Subgroup analyses of the meta-analysis according to different diagnosis tools for muscle mass.

210x297mm (300 x 300 DPI)

1  
2  
3  
4  
5  
6  
7  
8  
9  
10  
11  
12  
13  
14  
15  
16  
17  
18  
19  
20  
21  
22  
23  
24  
25  
26  
27  
28  
29  
30  
31  
32  
33  
34  
35  
36  
37  
38  
39  
40  
41  
42  
43  
44  
45  
46  
47  
48  
49  
50  
51  
52  
53  
54  
55  
56  
57  
58  
59  
60

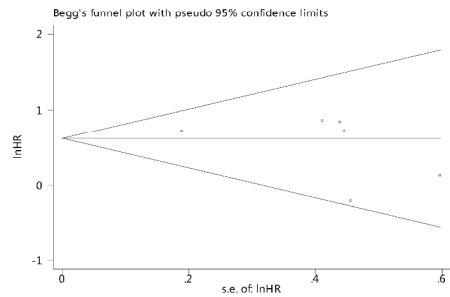

Figure 5. Funnel plot of sarcopenia and all-cause mortality among older nursing home residents

Funnel plot of sarcopenia and all-cause mortality among older nursing home residents.

210x297mm (300 x 300 DPI)



## MEDLINE (via PubMed)

- #1: Search sarcopenia\*
- #2: Search "Sarcopenia"[Mesh]
- #3: Search ("Sarcopenia"[Mesh]) OR sarcopenia\*
- #4: Search "Mortality"[Mesh]
- #5: Search mortality\*
- #6: Search "Death"[Mesh]
- #7: Search death\*
- #8: Search survival\*
- #9: Search "Survival"[Mesh]
- #10: Search (((("Survival"[Mesh]) OR survival\*) OR death\*) OR "Death"[Mesh]) OR mortality\*) OR "Mortality"[Mesh]
- #11: Search ((((((("Survival"[Mesh]) OR survival\*) OR death\*) OR "Death"[Mesh]) OR mortality\*) OR "Mortality"[Mesh])) AND (("Sarcopenia"[Mesh]) OR sarcopenia\*)

## Cochrane CENTRAL Library

- #1: Search sarcopenia\*
- #2: Search MeSH descriptor: [Sarcopenia] explode all trees
- #3: #1OR #2
- #4: Search MeSH descriptor: [mortality] explode all trees
- #5: Search mortality\*
- #6: Search MeSH descriptor: [death] explode all trees
- #7: Search death\*
- #8: Search survival\*
- #9: Search MeSH descriptor: [survival] explode all trees
- #10: #4 OR #5 OR #6 OR #7 OR #8 OR #9
- #11: # 3 AND #10

## EMBASE

- #1: 'sarcopenia'/exp
- #2: 'mortality'/exp
- #3: 'death'/exp
- #4: 'survival'/exp
- #5: #2 OR #3 OR #4
- #6: #1 AND #5

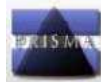

# PRISMA 2009 Checklist

| Section/Topic                      | #  | Checklist Item                                                                                                                                                                                                                                                                                              | Reported on Page # |
|------------------------------------|----|-------------------------------------------------------------------------------------------------------------------------------------------------------------------------------------------------------------------------------------------------------------------------------------------------------------|--------------------|
| <b>TITLE</b>                       |    |                                                                                                                                                                                                                                                                                                             |                    |
| Title                              | 1  | Identify the report as a systematic review, meta-analysis, or both.                                                                                                                                                                                                                                         | 1                  |
| <b>ABSTRACT</b>                    |    |                                                                                                                                                                                                                                                                                                             |                    |
| Structured summary                 | 2  | Provide a structured summary including, as applicable: background; objectives; data sources; study eligibility criteria, participants, and interventions; study appraisal and synthesis methods; results; limitations; conclusions and implications of key findings; systematic review registration number. | 2                  |
| <b>INTRODUCTION</b>                |    |                                                                                                                                                                                                                                                                                                             |                    |
| Rationale                          | 3  | Describe the rationale for the review in the context of what is already known.                                                                                                                                                                                                                              | 3                  |
| Objectives                         | 4  | Provide an explicit statement of questions being addressed with reference to participants, interventions, comparisons, outcomes, and study design (PICOS).                                                                                                                                                  | 4                  |
| <b>METHODS</b>                     |    |                                                                                                                                                                                                                                                                                                             |                    |
| Protocol and registration          | 5  | Indicate if a review protocol exists, if and where it can be accessed (e.g., Web address), and, if available, provide registration information including registration number.                                                                                                                               | 4                  |
| Eligibility criteria               | 6  | Specify study characteristics (e.g., PICOS, length of follow-up) and report characteristics (e.g., years considered, language, publication status) used as criteria for eligibility, giving rationale.                                                                                                      |                    |
| Information sources                | 7  | Describe all information sources (e.g., databases with dates of coverage, contact with study authors to identify additional studies) in the search and date last searched.                                                                                                                                  | 4                  |
| Search                             | 8  | Present full electronic search strategy for at least one database, including any limits used, such that it could be repeated.                                                                                                                                                                               | 5                  |
| Study selection                    | 9  | State the process for selecting studies (i.e., screening, eligibility, included in systematic review, and, if applicable, included in the meta-analysis).                                                                                                                                                   | 5                  |
| Data collection process            | 10 | Describe method of data extraction from reports (e.g., piloted forms, independently, in duplicate) and any processes for obtaining and confirming data from investigators.                                                                                                                                  | 5                  |
| Data items                         | 11 | List and define all variables for which data were sought (e.g., PICOS, funding sources) and any assumptions and simplifications made.                                                                                                                                                                       | 5                  |
| Risk of bias in individual studies | 12 | Describe methods used for assessing risk of bias of individual studies (including specification of whether this was done at the study or outcome level), and how this information is to be used in any data synthesis.                                                                                      | 6                  |
| Summary measures                   | 13 | State the principal summary measures (e.g., risk ratio, difference in means).                                                                                                                                                                                                                               | 6                  |
| Synthesis of results               | 14 | Describe the methods of handling data and combining results of studies, if done, including measures of consistency (e.g., $I^2$ ) for each meta-analysis.                                                                                                                                                   | 6                  |

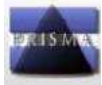

# PRISMA 2009 Checklist

Page 1 of 2

| Section/Topic                 | #  | Checklist Item                                                                                                                                                                                           | Reported on Page # |
|-------------------------------|----|----------------------------------------------------------------------------------------------------------------------------------------------------------------------------------------------------------|--------------------|
| Risk of bias across studies   | 15 | Specify any assessment of risk of bias that may affect the cumulative evidence (e.g., publication bias, selective reporting within studies).                                                             | 6                  |
| Additional analyses           | 16 | Describe methods of additional analyses (e.g., sensitivity or subgroup analyses, meta-regression), if done, indicating which were pre-specified.                                                         | 6                  |
| <b>RESULTS</b>                |    |                                                                                                                                                                                                          |                    |
| Study selection               | 17 | Give numbers of studies screened, assessed for eligibility, and included in the review, with reasons for exclusions at each stage, ideally with a flow diagram.                                          | 7                  |
| Study characteristics         | 18 | For each study, present characteristics for which data were extracted (e.g., study size, PICOS, follow-up period) and provide the citations.                                                             | 7                  |
| Risk of bias within studies   | 19 | Present data on risk of bias of each study and, if available, any outcome level assessment (see item 12).                                                                                                | 8                  |
| Results of individual studies | 20 | For all outcomes considered (benefits or harms), present, for each study: (a) simple summary data for each intervention group (b) effect estimates and confidence intervals, ideally with a forest plot. | 8                  |
| Synthesis of results          | 21 | Present the main results of the review. If meta-analyses done, include for each, confidence intervals and measures of consistency.                                                                       | 8                  |
| Risk of bias across studies   | 22 | Present results of any assessment of risk of bias across studies (see Item 15).                                                                                                                          | 8                  |
| Additional analysis           | 23 | Give results of additional analyses, if done (e.g., sensitivity or subgroup analyses, meta-regression [see Item 16]).                                                                                    |                    |
| <b>DISCUSSION</b>             |    |                                                                                                                                                                                                          |                    |
| Summary of evidence           | 24 | Summarize the main findings including the strength of evidence for each main outcome; consider their relevance to key groups (e.g., healthcare providers, users, and policy makers).                     | 8-10               |
| Limitations                   | 25 | Discuss limitations at study and outcome level (e.g., risk of bias), and at review-level (e.g., incomplete retrieval of identified research, reporting bias).                                            | 11                 |
| Conclusions                   | 26 | Provide a general interpretation of the results in the context of other evidence, and implications for future research.                                                                                  | 12                 |
| <b>FUNDING</b>                |    |                                                                                                                                                                                                          |                    |
| Funding                       | 27 | Describe sources of funding for the systematic review and other support (e.g., supply of data); role of funders for the systematic review.                                                               | 12                 |

From: Moher D, Liberati A, Tetzlaff J, Altman DG, The PRISMA Group (2009). Preferred Reporting Items for Systematic Reviews and Meta-Analyses: The PRISMA Statement. PLoS Med 6(6): e1000097. doi:10.1371/journal.pmed1000097

For more information, visit: [www.prisma-statement.org](http://www.prisma-statement.org).

For peer review only - <http://bmjopen.bmj.com/site/about/guidelines.xhtml>

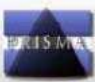

# PRISMA 2009 Checklist

- 1
- 2
- 3
- 4
- 5
- 6
- 7
- 8
- 9
- 10
- 11
- 12
- 13
- 14
- 15
- 16
- 17
- 18
- 19
- 20
- 21
- 22
- 23
- 24
- 25
- 26
- 27
- 28
- 29
- 30
- 31
- 32
- 33
- 34
- 35
- 36
- 37
- 38
- 39
- 40
- 41
- 42
- 43
- 44
- 45
- 46
- 47

For peer review only

# BMJ Open

## Sarcopenia as a predictor of all-cause mortality among older nursing home residents: a systematic review and meta-analysis

|                                 |                                                                                                                                                                                                                                                                                                                                                                                                                                                                                                                                                                                                                                                                                                                                                                                                                                                                                      |
|---------------------------------|--------------------------------------------------------------------------------------------------------------------------------------------------------------------------------------------------------------------------------------------------------------------------------------------------------------------------------------------------------------------------------------------------------------------------------------------------------------------------------------------------------------------------------------------------------------------------------------------------------------------------------------------------------------------------------------------------------------------------------------------------------------------------------------------------------------------------------------------------------------------------------------|
| Journal:                        | <i>BMJ Open</i>                                                                                                                                                                                                                                                                                                                                                                                                                                                                                                                                                                                                                                                                                                                                                                                                                                                                      |
| Manuscript ID                   | bmjopen-2017-021252.R2                                                                                                                                                                                                                                                                                                                                                                                                                                                                                                                                                                                                                                                                                                                                                                                                                                                               |
| Article Type:                   | Research                                                                                                                                                                                                                                                                                                                                                                                                                                                                                                                                                                                                                                                                                                                                                                                                                                                                             |
| Date Submitted by the Author:   | 27-Jun-2018                                                                                                                                                                                                                                                                                                                                                                                                                                                                                                                                                                                                                                                                                                                                                                                                                                                                          |
| Complete List of Authors:       | Zhang, Xiaoming; Department of Emergency, the affiliated Baoan Hospital of Southern Medical University, People's hospital of Baoan ShenZhen<br>Wang, Conghua; Department of Emergency, the affiliated Baoan Hospital of Southern Medical University, People's hospital of Baoan ShenZhen<br>Dou, Qingli; Department of Emergency, the affiliated Baoan Hospital of Southern Medical University, People's hospital of Baoan ShenZhen<br>Zhang, Wenwu; Department of Emergency, the affiliated Baoan Hospital of Southern Medical University, People's hospital of Baoan ShenZhen<br>Yang, Yunzhi; Department of Nursing, the affiliated Baoan Hospital of Southern Medical University, People's hospital of Baoan ShenZhen,<br>Department of Nursing<br>Xie, Xiaohua; Department of Nursing, the affiliated hospital of ShenZhen University, the second people's hospital of ShenZhen |
| <b>Primary Subject Heading</b>: | Geriatric medicine                                                                                                                                                                                                                                                                                                                                                                                                                                                                                                                                                                                                                                                                                                                                                                                                                                                                   |
| Secondary Subject Heading:      | Geriatric medicine, Nursing                                                                                                                                                                                                                                                                                                                                                                                                                                                                                                                                                                                                                                                                                                                                                                                                                                                          |
| Keywords:                       | Sarcopenia, All-cause mortality, Nursing Home, Meta-analysis, Sarcopenia; All-cause mortality; Nursing Home; Meta-analysis                                                                                                                                                                                                                                                                                                                                                                                                                                                                                                                                                                                                                                                                                                                                                           |
|                                 |                                                                                                                                                                                                                                                                                                                                                                                                                                                                                                                                                                                                                                                                                                                                                                                                                                                                                      |

SCHOLARONE™  
Manuscripts

1  
2  
3 **Sarcopenia as a predictor of all-cause mortality among older nursing home**  
4 **residents: a systematic review and meta-analysis**  
5

6 XiaomingZhang<sup>1†</sup>, ConghuaWang<sup>1†</sup>, QingliDou<sup>1</sup>, WenwuZhang<sup>1</sup>, Yunzhi Yang<sup>2\*</sup>  
7  
8 Xiaohua Xie<sup>3</sup>  
9

10 <sup>1</sup>Department of Emergency, the affiliated Baoan Hospital of Southern Medical  
11 University, People's hospital of Baoan ShenZhen  
12  
13

14 <sup>2</sup>Department of Nursing, the affiliated Baoan Hospital of Southern Medical University,  
15 People's hospital of Baoan ShenZhen  
16  
17

18 <sup>3</sup>Department of Nursing, the affiliated hospital of ShenZhen University, the second  
19 people's hospital of ShenZhen  
20  
21

22  
23 <sup>†</sup>Co-first authors  
24

25 <sup>\*</sup>Corresponding author  
26

27 Correspondence to: zjhkbcg@163.com. Mail Address: No. 118, longjing, Baoan  
28 District, Shenzhen 518101, China. Tel: +86- 1518135397.  
29  
30  
31  
32  
33  
34  
35  
36  
37  
38  
39  
40  
41  
42  
43  
44  
45  
46  
47  
48  
49  
50  
51  
52  
53  
54  
55  
56  
57  
58  
59  
60

## Abstract

**Objectives:** This study aims to review the evidence of sarcopenia as a predictor of all-cause mortality among nursing home residents.

**Design:** systematic review and meta-analysis of observational cohort studies

**Data sources:** PubMed, EMBASE, and the Cochrane Library databases were searched for relevant articles.

**Participants:** Nursing home residents.

**Primary and secondary outcome measures:** All-cause mortality

**Data analysis:** Summary-adjusted hazard ratios (HRs) or risk ratios (RRs) were calculated by fixed-effects model. The risk of bias was assessed by Newcastle-Ottawa Scale.

**Results:** Of 2292 studies identified through the systematic review, six studies (1494 participants) were included in the meta-analysis. Sarcopenia was significantly associated with a higher risk for all-cause mortality among nursing home residents (pooled HR=1.86, 95% confidence interval [95% CI] =1.42-2.45, P=0.000, I<sup>2</sup> =0). In addition, the subgroup analysis for length of follow-up demonstrated that a follow-up period of 1 year or more of analysis was associated with all-cause mortality (pooled HR 1.87, [95%CI]=1.38- 2.52, p= p=0.000); however, this was not found with the follow-up period less than 1 year. Furthermore, sarcopenia was significantly associated with the risk of mortality among older nursing home residents when using bioelectrical impedance analysis to diagnosis muscle mass (pooled HR=1.88, 95% CI = 1.39- 2.53, p=0.000); whereas, it was not found with anthropometric measures to diagnosis muscle mass.

**Conclusion:** Sarcopenia is a significant predictor of all-cause mortality among older nursing home residents. Therefore, it is important to diagnose sarcopenia and to treat the condition to reduce mortality rates among nursing home residents.

**PROSPEERO registration number:** CRD42018081668

**Key words:** Sarcopenia; All-cause mortality; Nursing Home; Meta-analysis

### Strengths and limitations of this study

1. To the best of our knowledge, this is the first meta-analysis to explore the relationship between sarcopenia and all-cause mortality among elderly nursing home residents.
2. An extensive search process in an electronic database was used and methodologic quality was assessed; we also tested the heterogeneity and publication bias and performed sensitivity analysis among the included studies.
3. This systematic review and meta-analysis assessed the overall quality of the evidence using a Newcastle Ottawa Scale (NOS) approach for prospective observational studies and conducted a meta-analysis and subgroup analysis.
4. The number of studies included in this analysis were insufficient, and the size sample was relatively small.
5. Different cutoff values for the muscle mass might affect the relationship between sarcopenia and all-cause mortality.

## 1. Introduction

Sarcopenia is a common syndrome characterised by a loss of muscle mass and strength with functional impairment and adverse health outcomes due to cumulative deficits of multiple systems<sup>1</sup>. Nursing home residents are at a particularly high risk for sarcopenia<sup>2</sup>. According to studies, the prevalence of sarcopenia was 1-29% for community-dwelling older adults, 14–85.4% in nursing homes<sup>2-4</sup> and 10-24.3% for those in hospitals<sup>5</sup>. Sarcopenia leads to a worse outcome in elderly people, including physical disability, falls, fractures, poor quality of life, mortality and hospitalisation<sup>6-8</sup>. Among these, mortality might be considered the most important outcome in elderly people. So far, the relationship between mortality and operational criteria that define sarcopenia has been well described in community-dwelling older adults and hospitalised patients. A recent meta-analysis study, Liu<sup>9</sup> *et al.*, analysed sarcopenia and mortality and concluded that sarcopenia is a predictor of all-cause mortality among



1  
2  
3 community-dwelling older people. However, there is no consistent conclusion  
4 regarding the relationship between sarcopenia and mortality among nursing home  
5 residents. It has been shown that the mortality rate in nursing homes<sup>10</sup> is approximately  
6 2-fold higher than that in the community<sup>11-13</sup>; therefore, it is very important to confirm  
7 the risk factors for mortality among nursing home residents.  
8  
9  
10  
11

12 Several studies found that elderly people with sarcopenia were predictors of  
13 all-cause mortality among nursing home residents<sup>14, 15</sup>. However, some studies did not  
14 find any significant relationship between sarcopenia and all-cause mortality<sup>16-19</sup>. Given  
15 the observed contradictory relationship between sarcopenia and all-cause mortality  
16 among nursing home residents in some studies, further studies are needed. However, no  
17 systematic reviews of meta-analysis studies on this topic have been conducted in the  
18 literature. Therefore, our study aims to identify and compare prospective cohort studies  
19 examining sarcopenia as a predictor of all-cause mortality among nursing home  
20 residents according to the Preferred Reporting Items for Systematic Reviews and  
21 Meta-Analyses (PRISMA) guidelines.  
22  
23  
24  
25  
26  
27  
28  
29

## 30 **2. Materials and methods**

31 This meta-analysis was registered with the international prospective Register for  
32 Systemic Reviews (CRD42018081668) and conducted according to the PRISMA  
33 guidelines<sup>20</sup>.  
34  
35  
36  
37

### 38 **2.1. Search strategy and selection criteria**

39 A systematic literature search was conducted in MEDLINE (via PubMed 1946 to  
40 November 2017), EMBASE (via EMBASE November 2017) and Cochrane  
41 CENTRAL Library (via Cochrane Library November 2017). The search strategy was  
42 tailored according to each database. We used a combination of key words such as  
43 mortality (mortality\*), OR death (death\*), OR survival (survival\*) and sarcopenia  
44 (sarcopenia\*), as well as MeSH terms. We also used subject terms and truncation  
45 symbols in our search strategy. We searched the potential grey studies through Google  
46 Scholar. Furthermore, we carried out a manual search on the references of included  
47 studies. The full search strategy for three databases has been provided as a  
48  
49  
50  
51  
52  
53  
54  
55  
56

1  
2  
3 supplementary file.

## 4 5 **2.2. Study selection**

6  
7 These studies identified by our search strategy were reviewed by teams of two  
8 independently blinded reviewers (Zhang XM and Wang CH) who evaluated each title  
9 and abstract. In case of disagreement whether to include or exclude studies, the issue  
10 was discussed and a third reviewer evaluated the study until the reviewers reached  
11 consensus.  
12  
13  
14  
15

## 16 **2.3. Inclusion and exclusion criteria**

17  
18 The following eligibility and exclusion criteria were prespecified. Studies had to  
19 fulfil the following four inclusion criteria: (1) prospective cohort studies, (2) studies  
20 investigating whether sarcopenia was a predictor of mortality, (3) studies reporting  
21 clear diagnostic criteria for sarcopenia, (4) type of participant: elderly adult in nursing  
22 home or nursing care. Exclusion criteria were as follows: (1) Type of participant:  
23 community-dwelling older people (aged 65 years or older) or hospitalised older people;  
24 (2) article type: only abstract, letters and laboratory research; review articles; (3)  
25 insufficient data; (4) other languages of studies, except English; (5) no clear definition  
26 of sarcopenia.  
27  
28  
29  
30  
31  
32  
33

## 34 **2.4. Data extraction**

35  
36 Two investigators (Zhang XM, Wang CH) independently abstracted the data from  
37 the selected studies using a standardised data-abstraction form. The following  
38 information was extracted from included papers: author, country, year of publication,  
39 demographic characteristics of participants (e.g., sample size, male proportion),  
40 measurement methods of sarcopenia, follow-up period, Adjusted variable, and study  
41 quality. The reviewers cross-checked all extracted data. Disagreements were resolved  
42 by discussion until consensus was reached.  
43  
44  
45  
46  
47  
48

## 49 **2.5. Assessment of risk bias**

50  
51 Assessment of risk of bias was performed by two independent reviewers (Zhang  
52 XM, Wang CH) according to the Newcastle Ottawa Scale (NOS)<sup>21</sup>: (1)  
53 representativeness of the exposed cohort, (2) comparability of group, (3) blinding of  
54  
55  
56

1  
2  
3 investigators who measured outcomes, (4) the time and completeness of follow-up, (5)  
4 contamination bias, and (6) other potential sources of bias. The total score of the scale is  
5 9 points. When the total score is  $\geq 5$  points, it is considered a high-quality research.  
6  
7

## 8 **2.6. Statistical analysis**

9  
10 The STATA version 14.0 (Stata Corp., College Station, TX, USA) was  
11 independently used for all analyses by two authors (Zhang XM, Dou QL). Hazard ratios  
12 (HRs), odds ratio (ORs) and their 95% CIs of mortality for sarcopenia compared with  
13 nonsarcopenia were extracted from studies for future meta-analysis. RR was  
14 considered equivalent to HR in our prospective cohort studies, which was reported in  
15 Carole Willi's<sup>22</sup> study and Ahmed N Mahmoud's study<sup>23</sup>. If a study reported the effect  
16 size as an OR, it was converted to RR using a previously described formula<sup>24</sup>. All the  
17 effect of HR or RR was converted to  $\ln(\text{HR})$  or  $\ln(\text{RR})$  for ratio in meta-analysis,  
18 Subgroup analyses were conducted by different diagnosis tools for muscle mass and  
19 follow-up period if there was more than one study in the subgroup. The statistical  
20 heterogeneity among the included studies was examined with Cochran's Q statistic  
21 using chi-square and  $I^2$  statistics, and  $I^2$  value of 25%, 50% and 75% represented the  
22 cut-off of low, moderate and high heterogeneity, respectively. If heterogeneity was  
23 found to be reasonably high between studies, the random-effects model was used.  
24 Otherwise, the fixed-effects model was used. Results were illustrated using forest plots,  
25 and Begg's Test was done to plot the log HR against its standard error for assessment of  
26 potential publication bias.  
27  
28  
29  
30  
31  
32  
33  
34  
35  
36  
37  
38  
39  
40

## 41 **2.7. Patient and Public Involvement**

42 The patients or public were not involved in the study.  
43

## 44 **3. Results**

### 45 **3.1. Search results**

46  
47 The literature search strategy initially identified 2292 articles. After removal of  
48 duplicates, 1965 articles were screened for potential eligibility. A total of 85  
49 publications remained for further consideration. Then we screened titles and abstracts  
50 and removed unrelated articles. Of these articles, 30 were removed because of non-  
51  
52  
53  
54  
55  
56

1  
2  
3 cohort studies (e.g., review articles, conference documents, cross-sectional study,  
4 case-control study), and six were removed because they had no clear definition of  
5 sarcopenia; moreover, 41 were removed on account of different study population:  
6 community-dwelling older people, patients in hospital, and used the same cohorts (n =  
7 2). These studies were screened according to the predefined inclusion and exclusion  
8 criteria for inclusion in the meta-analysis, resulting in a total of six eligible studies  
9 (Figure 1).

### 16 **3.2 Included studies**

17  
18 Six prospective cohort studies were included in our meta-analysis with 1494 total  
19 participants. Study characteristics of included papers are displayed in table 1. Two  
20 studies were conducted in Turkey<sup>25, 26</sup>, one study in Italy<sup>27-29</sup>, one study in Australia<sup>30</sup>,  
21 one study in Belgium and one study in Israel. All the studies selected all-cause  
22 mortality as the clinical outcome and used the sarcopenia criteria of the European  
23 Working Group for Sarcopenia (EWGSOP). The EWGSOP<sup>1</sup> recommends using the  
24 presence of both low muscle function (strength or performance) and low muscle mass  
25 for the diagnosis of sarcopenia. Thus, diagnosis of sarcopenia in the present study  
26 required the documentation of low muscle mass plus the documentation of either low  
27 muscle strength or low physical performance. The prevalence of sarcopenia ranged  
28 from 32.8 to 73.3%. The largest study consisted of 662 men and women, and the  
29 smallest cohort had only 58 individuals. Follow-up periods were not longer varying  
30 from 6 months to 24 months, and the adjusted HR was displayed in four studies, and  
31 one used OR and the other used RR. Table 2 shows the different tools and cutoff of  
32 muscle mass, muscle strength and physical performance. Four studies used  
33 bioelectrical impedance analysis (BAI) as a diagnostic criterion for muscle mass, and  
34 the other two studies used anthropometric measures as diagnostic criteria.

### 49 **3.3 Quality assessment**

50  
51 The methodologic quality evaluation using NOS of all items is shown in Table 3.  
52 The score of each study ranged from six to nine. The scores of five studies were more  
53 than seven.

### 3.4 Sarcopenia as a predictor of mortality

#### 3.4.1 Meta-analysis of studies

Six studies examined the association between sarcopenia and mortality among nursing home residents. The pooled HRs values were calculated by fixed-effects models. As show in Figure 2, the HRs of all-cause mortality for sarcopenia versus nonsarcopenia was 1.86 (95%CI=1.42-2.45, P=0.001). No significant heterogeneity was observed across these studies (Q-value=4.82, degree of freedom=5,  $I^2=0\%$ ,  $p=0.438$ ).

#### 3.4.2 Subgroup analysis

The six studies with HR of all-cause mortality risks for sarcopenia among nursing home residents were further analysed by subgroup. Figure 3 compares all-cause mortality risk stratified by length of follow-up for sarcopeina. Two studies with a follow-up period less than 1 year for sarcopenia (pooled HR 1.85, 95%CI 0.95–3.60,  $p=0.070$ ); whereas the analysis of other four studies had a follow-up period of 1 year or more (pooled HR 1.87,95%CI 1.38-2.52,  $p=0.00$ ). Figure 4 shows sarcopenia was significantly associated with the risk of morbidity among nursing home residents when using BIA to diagnose muscle mass (pooled effect size=1.88,95% CI =1.39- 2.53, $p=0.00$ ), whereas it was not associated when using anthropometric measures to diagnosis muscle mass (pooled effect size=1.79,95% CI=0.89-3.59, $p=0.10$ ).

#### 3.4.3 Publication bias assessment

There was no significant publication bias among the studies using Begg's test:  $P=0.386$  (Figure 5).

#### 3.4.4 sensitivity analysis of all studies.

We conducted a sensitivity analysis of sarcopenia and mortality by omitting one study each time and pooing the others to find which study would influence the main effect. No statistically significant changes were found, as shown in Figure 6.

## 4. Discussion

In this meta-analysis, we found evidence suggesting the risk of all-cause mortality among nursing home residents with sarcopenia was higher than that among nursing

1  
2  
3 home residents without sarcopenia. To the best of our knowledge, this is the first  
4 meta-analysis to explore the relationship between sarcopenia and all-cause mortality  
5 among nursing home residents. Our study indicated assessing sarcopenia is really  
6 important among the elderly that live in nursing homes.  
7  
8  
9

10 Ping Liu<sup>9</sup> *et al.* implemented a systematic review and meta-analysis regarding the  
11 association of sarcopenia with mortality in 2016, published in 2017. However, this  
12 review included a population entirely of community-dwelling older people. So far,  
13 Shu-Fang Chang<sup>31</sup> and Beaudart<sup>32</sup> both performed a systematic review to evaluate the  
14 link between sarcopenia and all-cause mortality; however, there were some  
15 methodologic shortcomings, such as various diagnostic criteria of sarcopenia, crude  
16 ORs as effect, various population involving community-dwelling older people and  
17 hospitalised patients. Although a subgroup of nursing home residents was analysed in  
18 Beaudart's study, there is only two studies that was assessed, which maybe  
19 underestimated or overestimated their result. Our review included six studies which  
20 focus only on the association of mortality and sarcopenia in nursing home residents. the  
21 results were stable and reliable after we tested the heterogeneity and publication bias  
22 and performed sensitivity analysis among the included studies.  
23  
24  
25  
26  
27  
28  
29  
30  
31  
32  
33

34 This meta-analysis of six cohort studies shows sarcopenia is an important  
35 predictor of all-cause mortality among nursing home residents. The pooled HR value of  
36 all-cause mortality was 1.86 (95%CI=1.41-2.45, P=0.000, I<sup>2</sup> = 0%). The perfect I<sup>2</sup>  
37 suggesting no significant heterogeneity was shown across these research. In addition,  
38 our study's pooled HR value is higher than that of Ping Liu (1.60 95%CI: 1.24–2.06 );  
39 the primary reason was the different type of population. Those living in a nursing home  
40 usually had worse health conditions and more comorbidities, more disability and more  
41 geriatric syndromes, such as cognitive dysfunction and malnutrition<sup>17, 33-35</sup>. This  
42 comprehensive risk factor may aggravate the process of sarcopenia.  
43  
44  
45  
46  
47  
48  
49  
50

51 The prevalence of sarcopenia was 32.8-73.3%, which is higher than that in other  
52 studies. The difference was mainly due to the mean age, various population and  
53 different diagnostic tools, particularly the ways researchers measured muscle mass.  
54  
55  
56

1  
2  
3 Sarcopenia was associated with all-cause mortality when using BIA to diagnose muscle  
4 mass; whereas it was not associated when using anthropometric measures to diagnose  
5 muscle mass. According to the EWGSOP<sup>1</sup>, BIA is the most common tool for  
6 diagnosing muscle mass; moreover, the test is inexpensive, easy to use, readily  
7 reproducible and appropriate for both ambulatory and bedridden patients, which may  
8 be considered a portable alternative to DXA (Dual Energy X-ray Absorptiometry) in  
9 nursing homes. However, the method of anthropometric measures was based on  
10 mid-upper-arm circumference and skin fold thickness<sup>36</sup>; therefore, age-related changes  
11 in fat deposits and loss of skin elasticity contribute to errors of estimation in older  
12 nursing home residents, which are prone to produce errors<sup>37</sup>. Furthermore,  
13 anthropometric measures were not recommended for routine use in the diagnosis of  
14 sarcopenia. The subgroup of length of follow-up analysis demonstrated that follow-up  
15 period of 1 year or more was associated with all-cause mortality (pooled  
16 HR=1.87,95%CI 1.38-2.52, p=0.000); however, it was not found with the follow-up  
17 period of less than 1 year. The power for the short term analyses was too small to have  
18 a significant result. Therefore, more perspective cohort studies about this issue must be  
19 conducted in the future.

20  
21  
22  
23  
24  
25  
26  
27  
28  
29  
30  
31  
32  
33  
34  
35  
36  
37  
38  
39  
40  
41  
42  
43  
44  
45  
46  
47  
48  
49  
50  
51  
52  
53  
54  
55  
56  
57  
58  
59  
60  
The underlying mechanisms between sarcopenia and a higher risk of all-cause mortality were unable to draw conclusion; some aspects should be mentioned at least. Firstly, the association between sarcopenia and mortality may be explained by the hypothesised adverse effects of a low muscle mass in older people. Several studies showed that low muscle mass is highly associated with increased mortality<sup>38-40</sup>. In addition, elderly people in nursing homes are at high risk of malnutrition<sup>41</sup>, which aggravates low muscle mass, resulting in an increased mortality rate. Secondly, sarcopenia is linked to multiple factors ranging from aging process<sup>42</sup>, multiple chronic health conditions, unhealthy lifestyle<sup>43</sup>, hormonal factors<sup>44</sup>, inflammation<sup>45</sup> and so on<sup>46</sup>. Meanwhile, the above factors are consider linked to mortality and the development of multifactor worsened the situation of sarcopenia, leading to a passive adaption to adversity or external stressors, which in turn generate increased poor adverse



1  
2  
3 outcomes<sup>47</sup>. Thirdly, according to the study of Fried<sup>48</sup> *et al.*, sarcopenia played a critical  
4 etiologic role in the frailty process, which is related, through frailty, to pernicious  
5 consequences—for instance, recurrent falls, bone fracture, disability, multiple  
6 emergency room visits and hospital admissions and eventually death<sup>49, 50</sup>. Moreover,  
7 sarcopenia is considered to increase the risk of falls among the elderly<sup>51</sup>, and falls were  
8 the major causes of death in nursing home residents<sup>52</sup>. Sarcopenia is a geriatric  
9 syndrome rather than a disease; the mechanism of sarcopenia must be complex, which  
10 needs more research to explore.  
11

12  
13  
14  
15  
16  
17  
18 Our meta-analysis review has multiple strengths and some limitations. One  
19 strength was that we used an extensive search process in electronic databases and  
20 assessed methodologic quality and tested the heterogeneity and publication bias among  
21 the included studies. Another strength was that the included original studies were all of  
22 prospective design, which minimized the possibility of recall bias and selection bias.  
23 However, our study also has some limitations. Firstly, two included studies did not  
24 directly report the HR in the sarcopenia group versus the non-sarcopenia group, but  
25 used an approximation of OR to RR, and from RR to HR in the sarcopenia group, which  
26 might not show an accurate HR value. Therefore, this approach may lead to method  
27 heterogeneity. Another concern was that the cut-off for the muscle mass was different  
28 in some studies, which will cause the prevalence of Sarcopenia to be various, thus  
29 potentially influencing the result. Thirdly, the number of included studies in this  
30 analysis was insufficient, and the sample size was relatively small. Fourthly, we  
31 ignored the different adjusted confounding factors of the derived HR from different  
32 studies. Fifthly, the language of studies was limited to English, and consequently we  
33 may have missing data from important studies published in other languages, which may  
34 result in potential language bias. In addition, the follow-up was relatively short for the  
35 necessary latency, which may underestimate the results.  
36  
37  
38  
39  
40  
41  
42  
43  
44  
45  
46  
47  
48  
49  
50

## 51 **5. Conclusion**

52  
53 This study provides evidence that sarcopenia is a significant predictor of all-cause  
54 mortality among nursing home residents based on the comprehensive systematic  
55



1  
2  
3 review and meta-analysis. Further studies are needed to provide evidence for specific  
4 interventions to prevent and treat sarcopenia, which can reduce mortality in people  
5 living in a nursing home.  
6  
7

## 8 **6. Acknowledgements**

9  
10 The authors thank the staffs of the Department of Emergency Medicine, people's  
11 hospital of Baoan ShenZhen for their guidance and support.  
12  
13

## 14 **7. Financial Support**

15  
16 This research received no specific grant from any funding agency, commercial or  
17 not-for-profit sectors. No sponsors had any role in the design, methods, subject  
18 recruitment, data collections, analysis or preparation of this manuscript.  
19  
20

## 21 **8. Contributors**

22  
23 Xiaoming Zhang was responsible for producing the initial draft of the manuscript.

24  
25 Conghua Wang was responsible for data extraction and for producing the initial draft  
26 of the manuscript.  
27

28  
29 Qingli Dou was responsible for data extraction.

30  
31 Wenwu Zhang was responsible for screening the papers and quality assessment.

32  
33 Xiaohua Xiewas responsible for screening the papers.

34  
35 Yunzhi Yang was responsible for quality assessment, statistical analysis and revision  
36 of the manuscript.  
37

38  
39 All the authors approved the final version of the manuscript

## 40 **9. Conflict of Interest**

41  
42 None of the authors have any conflict of interest to declare.  
43

## 44 **10. Patient consent**

45  
46 Not required.

## 47 **10. Data Sharing Statements**

48  
49 All the data can be found in the electronic databases (PubMed, EMBASE, and the  
50 Cochrane Library).  
51

## 52 **References**

- 53  
54 1. Cruz-Jentoft AJ, Baeyens JP, Bauer JM, Boirie Y, Cederholm T, Landi F, et al. Sarcopenia:  
55

- 1  
2  
3 European consensus on definition and diagnosis: Report of the european working group on  
4 sarcopenia in older people. *Age and ageing*. 2010;39:412-423  
5  
6 2. Landi F, Liperoti R, Fusco D, Mastropaolo S, Quattrociochi D, Proia A, et al. Prevalence and  
7 risk factors of sarcopenia among nursing home older residents. *The journals of gerontology.*  
8 *Series A, Biological sciences and medical sciences*. 2012;67:48-55  
9  
10 3. Senior HE, Henwood TR, Beller EM, Mitchell GK, Keogh JW. Prevalence and risk factors of  
11 sarcopenia among adults living in nursing homes. *Maturitas*. 2015;82:418-423  
12  
13 4. Bahat G, Saka B, Tufan F, Akin S, Sivrikaya S, Yucel N, et al. Prevalence of sarcopenia and its  
14 association with functional and nutritional status among male residents in a nursing home in  
15 turkey. *The aging male : the official journal of the International Society for the Study of the*  
16 *Aging Male*. 2010;13:211-214  
17  
18 5. Cruz-Jentoft AJ, Landi F, Schneider SM, Zuniga C, Arai H, Boirie Y, et al. Prevalence of and  
19 interventions for sarcopenia in ageing adults: A systematic review. Report of the  
20 international sarcopenia initiative (ewgsop and iwgs). *Age and ageing*. 2014;43:748-759  
21  
22 6. Beudart C, McCloskey E, Bruyere O, Cesari M, Rolland Y, Rizzoli R, et al. Sarcopenia in daily  
23 practice: Assessment and management. *BMC geriatrics*. 2016;16:170  
24  
25 7. Woo J. Sarcopenia. *Clinics in geriatric medicine*. 2017;33:305-314  
26  
27 8. Landi F, Liperoti R, Russo A, Giovannini S, Tosato M, Capoluongo E, et al. Sarcopenia as a risk  
28 factor for falls in elderly individuals: Results from the ilsirente study. *Clinical nutrition*  
29 *(Edinburgh, Scotland)*. 2012;31:652-658  
30  
31 9. Liu P, Hao Q, Hai S, Wang H, Cao L, Dong B. Sarcopenia as a predictor of all-cause mortality  
32 among community-dwelling older people: A systematic review and meta-analysis. *Maturitas*.  
33 2017;103:16-22  
34  
35 10. Goldberg TH, Botero A. Causes of death in elderly nursing home residents. *Journal of the*  
36 *American Medical Directors Association*. 2008;9:565-567  
37  
38 11. Kim JH, Lim S, Choi SH, Kim KM, Yoon JW, Kim KW, et al. Sarcopenia: An independent  
39 predictor of mortality in community-dwelling older korean men. *The journals of gerontology.*  
40 *Series A, Biological sciences and medical sciences*. 2014;69:1244-1252  
41  
42 12. Wauters M, Elseviers M, Vaes B, Degryse J, Vander Stichele R, Christiaens T, et al. Mortality,  
43 hospitalisation, institutionalisation in community-dwelling oldest old: The impact of  
44 medication. *Archives of gerontology and geriatrics*. 2016;65:9-16  
45  
46 13. Arango-Lopera VE, Arroyo P, Gutierrez-Robledo LM, Perez-Zepeda MU, Cesari M. Mortality  
47 as an adverse outcome of sarcopenia. *The journal of nutrition, health & aging*.  
48 2013;17:259-262  
49  
50 14. Buckinx F, Croisier JL, Reginster JY, Lenaerts C, Brunois T, Rygaert X, et al. Prediction of the  
51 incidence of falls and deaths among elderly nursing home residents: The senior study.  
52 *Journal of the American Medical Directors Association*. 2017  
53  
54 15. Landi F, Liperoti R, Fusco D, Mastropaolo S, Quattrociochi D, Proia A, et al. Sarcopenia and  
55  
56  
57  
58  
59  
60

- mortality among older nursing home residents. *Journal of the American Medical Directors Association*. 2012;13:121-126
16. Henwood T, Hassan B, Swinton P, Senior H, Keogh J. Consequences of sarcopenia among nursing home residents at long-term follow-up. *Geriatric nursing (New York, N.Y.)*. 2017;38:406-411
17. Saka B, Ozkaya H, Karisik E, Akin S, Akpınar TS, Tufan F, et al. Malnutrition and sarcopenia are associated with increased mortality rate in nursing home residents: A prospective study. *European Geriatric Medicine*. 2016;7:232-238
18. Yalcin A, Aras S, Atmis V, Cengiz OK, Cinar E, Atli T, et al. Sarcopenia and mortality in older people living in a nursing home in turkey. *Geriatrics and Gerontology International*. 2017;17:1118-1124
19. Kimyagarov S, Klid R, Fleissig Y, Kopel B, Arad M, Adunsky A. Skeletal muscle mass abnormalities are associated with survival rates of institutionalized elderly nursing home residents. *The journal of nutrition, health & aging*. 2012;16:432-436
20. Moher D, Liberati A, Tetzlaff J, Altman DG. Preferred reporting items for systematic reviews and meta-analyses: The prisma statement. *International journal of surgery (London, England)*. 2010;8:336-341
21. Stang A. Critical evaluation of the newcastle-ottawa scale for the assessment of the quality of nonrandomized studies in meta-analyses. *European journal of epidemiology*. 2010;25:603-605
22. Willi C, Bodenmann P, Ghali WA, Faris PD, Cornuz J. Active smoking and the risk of type 2 diabetes: A systematic review and meta-analysis. *Jama*. 2007;298:2654-2664
23. Mahmoud AN, Mentias A, Elgendy AY, Qazi A, Barakat AF. Migraine and the risk of cardiovascular and cerebrovascular events: A meta-analysis of 16 cohort studies including 1 152 407 subjects. 2018;8:e020498
24. Grant RL. Converting an odds ratio to a range of plausible relative risks for better communication of research findings. *BMJ (Clinical research ed.)*. 2014;348:f7450
25. Chalhoub D, Cawthon P, Ensrud K, Stefanick M, Kado D, Orwoll E, et al. Risk of non-spine fractures among men and women with sarcopenia, low bone mass or both. *Journal of Bone and Mineral Research*. 2013;28
26. Cawthon PM, Blackwell TL, Cauley J, Kado DM, Barrett-Connor E, Lee CG, et al. Evaluation of the usefulness of consensus definitions of sarcopenia in older men: Results from the observational osteoporotic fractures in men cohort study. *Journal of the American Geriatrics Society*. 2015;63:2247-2259
27. Scott D, Seibel M, Cumming R, Naganathan V, Blyth F, Le Couteur DG, et al. Sarcopenic obesity and its temporal associations with changes in bone mineral density, incident falls, and fractures in older men: The concord health and ageing in men project. *Journal of Bone and Mineral Research*. 2017;32:575-583

- 1
  - 2
  - 3
  - 4
  - 5
  - 6
  - 7
  - 8
  - 9
  - 10
  - 11
  - 12
  - 13
  - 14
  - 15
  - 16
  - 17
  - 18
  - 19
  - 20
  - 21
  - 22
  - 23
  - 24
  - 25
  - 26
  - 27
  - 28
  - 29
  - 30
  - 31
  - 32
  - 33
  - 34
  - 35
  - 36
  - 37
  - 38
  - 39
  - 40
  - 41
  - 42
  - 43
  - 44
  - 45
  - 46
  - 47
  - 48
  - 49
  - 50
  - 51
  - 52
  - 53
  - 54
  - 55
  - 56
  - 57
  - 58
  - 59
  - 60
28. Scott D, Chandrasekara SD, Laslett LL, Cicuttini F, Ebeling PR, Jones G. Associations of sarcopenic obesity and dynapenic obesity with bone mineral density and incident fractures over 5–10 years in community-dwelling older adults. *Calcified tissue international*. 2016;99:30-42
29. Yu R, Leung J, Woo J. Incremental predictive value of sarcopenia for incident fracture in an elderly chinese cohort: Results from the osteoporotic fractures in men (mros) study. *Journal of the American Medical Directors Association*. 2014;15:551-558
30. Hars M, Biver E, Chevalley T, Herrmann F, Rizzoli R, Ferrari S, et al. Low lean mass predicts incident fractures independently from frax: A prospective cohort study of recent retirees. *Journal of Bone and Mineral Research*. 2016;31:2048-2056
31. Chang SF, Lin PL. Systematic literature review and meta-analysis of the association of sarcopenia with mortality. *Worldviews on evidence-based nursing*. 2016;13:153-162
32. Beaudart C, Zaaria M, Pasleau F, Reginster JY, Bruyere O. Health outcomes of sarcopenia: A systematic review and meta-analysis. *PloS one*. 2017;12:e0169548
33. Hoffmann F, Kaduszkiewicz H, Glaeske G, van den Bussche H, Koller D. Prevalence of dementia in nursing home and community-dwelling older adults in germany. *Aging clinical and experimental research*. 2014;26:555-559
34. Ronald LA, McGregor MJ, McGrail KM, Tate RB, Broemling AM. Hospitalization rates of nursing home residents and community-dwelling seniors in british columbia. *Canadian journal on aging = La revue canadienne du vieillissement*. 2008;27:109-115
35. Benzinger P, Becker C, Kerse N, Bleibler F, Buchele G, Icks A, et al. Pelvic fracture rates in community-living people with and without disability and in residents of nursing homes. *Journal of the American Medical Directors Association*. 2013;14:673-678
36. Rolland Y, Lauwers-Cances V, Cournot M, Nourhashemi F, Reynish W, Riviere D, et al. Sarcopenia, calf circumference, and physical function of elderly women: A cross-sectional study. *Journal of the American Geriatrics Society*. 2003;51:1120-1124
37. Rolland Y, Czerwinski S, Abellan Van Kan G, Morley JE, Cesari M, Onder G, et al. Sarcopenia: Its assessment, etiology, pathogenesis, consequences and future perspectives. *The journal of nutrition, health & aging*. 2008;12:433-450
38. Brown JC, Harhay MO, Harhay MN. Appendicular lean mass and mortality among prefrail and frail older adults. *The journal of nutrition, health & aging*. 2017;21:342-345
39. Cesari M, Pahor M, Lauretani F, Zamboni V, Bandinelli S, Bernabei R, et al. Skeletal muscle and mortality results from the inchianti study. *The journals of gerontology. Series A, Biological sciences and medical sciences*. 2009;64:377-384
40. Wijnhoven HA, van Bokhorst-de van der Schueren MA, Heymans MW, de Vet HC, Kruijenga HM, Twisk JW, et al. Low mid-upper arm circumference, calf circumference, and body mass index and mortality in older persons. *The journals of gerontology. Series A, Biological sciences and medical sciences*. 2010;65:1107-1114

- 1
  - 2
  - 3
  - 4
  - 5
  - 6
  - 7
  - 8
  - 9
  - 10
  - 11
  - 12
  - 13
  - 14
  - 15
  - 16
  - 17
  - 18
  - 19
  - 20
  - 21
  - 22
  - 23
  - 24
  - 25
  - 26
  - 27
  - 28
  - 29
  - 30
  - 31
  - 32
  - 33
  - 34
  - 35
  - 36
  - 37
  - 38
  - 39
  - 40
  - 41
  - 42
  - 43
  - 44
  - 45
  - 46
  - 47
  - 48
  - 49
  - 50
  - 51
  - 52
  - 53
  - 54
  - 55
  - 56
  - 57
  - 58
  - 59
  - 60
41. Vandewoude MF, Alish CJ, Sauer AC, Hegazi RA. Malnutrition-sarcopenia syndrome: Is this the future of nutrition screening and assessment for older adults? *J Aging Res.* 2012;2012:651570
42. Marzetti E, Lees HA, Wohlgemuth SE, Leeuwenburgh C. Sarcopenia of aging: Underlying cellular mechanisms and protection by calorie restriction. *BioFactors (Oxford, England).* 2009;35:28-35
43. Cruz-Jentoft AJ, Kiesswetter E, Drey M, Sieber CC. Nutrition, frailty, and sarcopenia. *Aging Clin Exp Res.* 2017;29:43-48
44. Martone AM, Lattanzio F, Abbatecola AM, Carpia DL, Tosato M, Marzetti E, et al. Treating sarcopenia in older and oldest old. *Curr Pharm Des.* 2015;21:1715-1722
45. Westbury LD, Fuggle NR, Syddall HE, Duggal NA, Shaw SC, Maslin K, et al. Relationships between markers of inflammation and muscle mass, strength and function: Findings from the hertfordshire cohort study. *Calcif Tissue Int.* 2017
46. Malafarina V, Úriz-Otano F, Iniesta R, Gil-Guerrero L. Sarcopenia in the elderly: Diagnosis, physiopathology and treatment. *Maturitas.* 2012;71:109-114
47. Cruz-Jentoft AJ, Landi F, Topinkova E, Michel JP. Understanding sarcopenia as a geriatric syndrome. *Curr Opin Clin Nutr Metab Care.* 2010;13:1-7
48. Fried LP, Tangen CM, Walston J, Newman AB, Hirsch C, Gottdiener J, et al. Frailty in older adults: Evidence for a phenotype. *The journals of gerontology. Series A, Biological sciences and medical sciences.* 2001;56:M146-156
49. Wick JY. Understanding frailty in the geriatric population. *The Consultant pharmacist : the journal of the American Society of Consultant Pharmacists.* 2011;26:634-645
50. Bernabei R, Martone AM, Vetrano DL, Calvani R, Landi F, Marzetti E. Frailty, physical frailty, sarcopenia: A new conceptual model. *Studies in health technology and informatics.* 2014;203:78-84
51. Matsumoto H, Tanimura C. Sarcopenia is a risk factor for falling in independently living japanese older adults: A 2-year prospective cohort study of the gaina study. 2017;17:2124-2130
52. Ibrahim JE, Bugeja L, Willoughby M, Bevan M, Kipsaina C, Young C, et al. Premature deaths of nursing home residents: An epidemiological analysis. *The Medical journal of Australia.* 2017;206:442-447

1  
2  
3  
4  
5  
6  
7  
8  
9  
10  
11  
12  
13  
14  
15  
16  
17  
18  
19  
20  
21  
22  
23  
24  
25  
26  
27  
28  
29  
30  
31  
32  
33  
34  
35  
36  
37  
38  
39  
40  
41  
42  
43  
44  
45  
46  
47

Table 1 Summary of Included Studies on Sarcopenia Associated with All-cause Mortality

| Author   | Country | Year | Male  | Sample number | Age of patients, years | Prevalence% | Follow-up period | mortality rate | Effect Measure | Adjusted or Crude HR/OR                                                                                                                                                             | Quality* |
|----------|---------|------|-------|---------------|------------------------|-------------|------------------|----------------|----------------|-------------------------------------------------------------------------------------------------------------------------------------------------------------------------------------|----------|
| Saka B   | Turkey  | 2015 | 51%   | 402           | 78.0±7.9               | 73.3        | 12 months        | 16.2%          | HR             | Adjusted                                                                                                                                                                            | 8        |
| Yalcin A | Turkey  | 2017 | 54.3% | 141           | 79.17±7.99             | 53.9        | 24 months        | 23.4%          | HR             | Age,sex,BMI,Calf circumference, MMSE,MNA, cerebrovascular diseases, osteoarthritis, chronic obstructive pulmonary disease, activity of daily living impairment, Diabetes, Dementia. | 7        |
| Landi F  | Italy   | 2012 | 25%   | 122           | 84.1±4.8               | 32.8        | 6 months         | 21.3%          | HRs            | Age, sex, cerebrovascular diseases, osteoarthritis, chronic obstructive pulmonary disease,                                                                                          | 8        |

1  
2  
3  
4  
5  
6  
7  
8  
9  
10  
11  
12  
13  
14  
15  
16  
17  
18  
19  
20  
21  
22  
23  
24  
25  
26  
27  
28  
29  
30  
31  
32  
33  
34  
35  
36  
37  
38  
39  
40  
41  
42  
43  
44  
45  
46  
47

|           |           |      |       |     |           |      |           |       |    |                                                                                                                                                                                                                                                                                                                                                                                              |                                     |  |
|-----------|-----------|------|-------|-----|-----------|------|-----------|-------|----|----------------------------------------------------------------------------------------------------------------------------------------------------------------------------------------------------------------------------------------------------------------------------------------------------------------------------------------------------------------------------------------------|-------------------------------------|--|
|           |           |      |       |     |           |      |           |       |    |                                                                                                                                                                                                                                                                                                                                                                                              | Activity of daily living impairment |  |
| Henwood T | Australia | 2017 | 29.3% | 58  | 85.7±8.2  | 51.7 | 18 months | 21.6% | RR | Age, sex, BMI, MNA, physical activity                                                                                                                                                                                                                                                                                                                                                        | 6                                   |  |
| Buckinx F | Belgium   | 2017 | 27.5% | 662 | 83.2±8.99 | 36.2 | 12 months | 15.9% | OR | Age, sex, BMI, Frailty, Waist circumference, Calf circumference, Arm circumference, Wrist circumference, Walking support, Drugs consumed, Medical history, MMSE, Minnesota ,MNA, Body fat,SF-36, EuroQol five dimensions, EuroQol-Visual Analogue Scale, Katz score, Fear of falling, Tinetti test, TUG test, SPPB test, Gait speed, Grip strength, Peak expiratory flow, Isometric strength | 7                                   |  |

1  
2  
3  
4  
5  
6  
7  
8  
9  
10  
11  
12  
13  
14  
15  
16  
17  
18  
19  
20  
21  
22  
23  
24  
25  
26  
27  
28  
29  
30  
31  
32  
33  
34  
35  
36  
37  
38  
39  
40  
41  
42  
43  
44  
45  
46  
47

|            |        |      |       |     |          |      |           |       |    |                            |   |
|------------|--------|------|-------|-----|----------|------|-----------|-------|----|----------------------------|---|
| Kimyagarov | Israel | 2012 | 41.2% | 109 | 84.9±7.4 | 40.3 | 12 months | 61.5% | HR | Age, sex, BMI              | 7 |
| S          |        |      |       |     |          |      |           |       |    | Charlson comorbidity index |   |

---

EWGSOP(European Working Group for Sarcopenia in Older Persons) defines sarcopenia in men as ALM adjusted for height squared <7.25 kg/m<sup>2</sup> combined with low hand-grip strength (<30 kg) and/or low gait speed(<0.8 m/s).

Quality\* of the studies were assessed with Newcastle-Ottawa Scale(NOS); BMI: body mass index;MMSE: Mini-Mental State Examination; MNA:Mini-Nutritional Assessment; SF-36: Short Form Health Survey questionnaires; EuroQol five dimensions; EuroQol-Visual Analogue Scale;Tinetti test;TUG test: Timed Up and Go;SPPB test: Short physical performance battery



Table 2 Study and Sarcopenia criteria

| study             | Sarcopenia criteria    | Item, tool, Cutoff points | Muscle mass                                                                                                     | Muscle strength       | Physical performance                                       | Ref                                      |                        |    |
|-------------------|------------------------|---------------------------|-----------------------------------------------------------------------------------------------------------------|-----------------------|------------------------------------------------------------|------------------------------------------|------------------------|----|
|                   |                        | Tool                      | Cutoff points                                                                                                   | Tool                  | Cutoff points                                              | Tool                                     | Cutoff point           |    |
| Yalcin A<br>2017  | EWFSOP                 | BIA                       | Men: SMI $\leq 8.87 \text{ Kg/m}^2$<br>Women: SMI $\leq 6.42 \text{ Kg/m}^2$                                    | handgrip strength     | Men: HGS $< 30 \text{ Kg}$<br>Women: HGS $< 20 \text{ Kg}$ | Gait speed: 4-m                          | $\leq 0.8 \text{ m/s}$ | 18 |
| Buckinx F<br>2017 | EWFSOP                 | BIA                       | Men: SMI $\leq 8.87 \text{ Kg/m}^2$<br>Women: SMI $\leq 6.42 \text{ Kg/m}^2$                                    | Handgrip strength     | None                                                       | SPPB: Short Physical Performance Battery | $\leq 0.8 \text{ m/s}$ | 14 |
| Henwood T         | EWFSOP                 | BIA                       | Men: SMI $< 8.87 \text{ kg/m}^2$<br>Women: SMI $< 6.42 \text{ kg/m}^2$                                          | hand grip Strength    | Men: HGS $< 30 \text{ Kg}$<br>Women: HGS $< 20 \text{ Kg}$ | SPPB: Short Physical Performance Battery | $\leq 0.8 \text{ m/s}$ | 16 |
| Saka B            | EWFSOP                 | anthropometric measures   | CC $< 31 \text{ cm}$ in men and women<br>MuAMC $< 23.8 \text{ cm}$ in men<br>MUAMC $< 23.3 \text{ cm}$ in women | hand grip Strength    | Men: HGS $< 30 \text{ Kg}$<br>Women: HGS $< 20 \text{ Kg}$ | Gait speed: 4-m                          | $\leq 0.8 \text{ m/s}$ | 17 |
| Kimyagarov S      | NIH-sponsored workshop | anthropometric measures   | SMM index: (males) $< 10.5 \text{ kg/m}^2$ (females) $< 8.5 \text{ kg/m}^2$                                     | manual muscle testing | MMT* score $< 106$                                         | None                                     | None                   | 19 |

1  
2  
3  
4  
5  
6  
7  
8  
9  
10  
11  
12  
13  
14  
15  
16  
17  
18  
19  
20  
21  
22  
23  
24  
25  
26  
27  
28  
29  
30  
31  
32  
33  
34  
35  
36  
37  
38  
39  
40  
41  
42  
43  
44  
45  
46  
47

|        |        |     |                                   |           |                 |                 |           |    |
|--------|--------|-----|-----------------------------------|-----------|-----------------|-----------------|-----------|----|
| LandiF | EWFSOP | BIA | Men:SMI <8.87 kg/m <sup>2</sup>   | hand grip | Men:HGS <30Kg   | Gait speed: 4-m | ≤ 0.8 m/s | 15 |
|        |        |     | Women:SMI <6.42 kg/m <sup>2</sup> | Strength  | Women:HGS <20Kg |                 |           |    |

MMT\*: an isometric semi-quantitative measurement of eight limb muscles groups, in which muscle strength has subjective grades. On the classic 0 to 5-point scale, the lowest grade (0) indicates no contractility or muscle activation, and the highest possible grade (160 points) represents full resistance.

Table 3  
Result of the Newcastle-Ottawa scale quality assessment

| Newcastle-Ottawa scale |                                                                          | Saka B 2015 | Yalcin A 2017 | LandiF 2012 | Kimyagarov S 2012 | Henwood T 2017 | Buckinx F 2017 |
|------------------------|--------------------------------------------------------------------------|-------------|---------------|-------------|-------------------|----------------|----------------|
| Selection(4)           | Representativeness of the exposed cohort                                 | 1           | 1             | 1           | 1                 | 1              | 1              |
|                        | Selection of the non-exposed cohort                                      | 1           | 1             | 1           | 1                 | 1              | 1              |
|                        | Ascertainment of exposure                                                | 1           | 1             | 1           | 1                 | 1              | 1              |
|                        | Demonstration that outcome of interest was not present at start of study | 1           | 1             | 1           | 1                 | 1              | 1              |
| Comparability(2)       | Comparability of cohorts on the basis of the design or analysis          | 2           | 1             | 2           | 1                 | 1              | 2              |
| Outcome(3)             | Assessment of outcome                                                    | 1           | 1             | 1           | 1                 | 1              | 1              |
|                        | Was follow-up long enough for                                            | 0           | 0             | 0           | 0                 | 0              | 0              |

1  
2  
3  
4  
5  
6  
7  
8  
9  
10  
11  
12  
13  
14  
15  
16  
17  
18  
19  
20  
21  
22  
23  
24  
25  
26  
27  
28  
29  
30  
31  
32  
33  
34  
35  
36  
37  
38  
39  
40  
41  
42  
43  
44  
45  
46  
47

|            |                                  |   |   |   |   |   |   |
|------------|----------------------------------|---|---|---|---|---|---|
|            | outcome to occur                 |   |   |   |   |   |   |
|            | Adequacy of follow up of cohorts | 1 | 1 | 1 | 1 | 1 | 1 |
| Quality(9) | Total                            | 8 | 7 | 8 | 7 | 6 | 7 |

For peer review only

1  
2  
3 Figure 1. The flow diagram of studies selection.

4 Figure 2. Meta-analysis of the association between sarcopenia and mortality among older nursing  
5 home residents.

6  
7 Figure 3. Subgroup analyses of the meta-analysis according to length of follow-up.

8  
9 Figure 4. Subgroup analyses of the meta-analysis according to different diagnosis tools for muscle  
10 mass.

11 Figure 5. Funnel plot of sarcopenia and all-cause mortality among older nursing home residents.

12  
13 Figure 6. Sensitivity analysis of all studies.  
14  
15  
16  
17  
18  
19  
20  
21  
22  
23  
24  
25  
26  
27  
28  
29  
30  
31  
32  
33  
34  
35  
36  
37  
38  
39  
40  
41  
42  
43  
44  
45  
46  
47  
48  
49  
50  
51  
52  
53  
54  
55  
56  
57  
58  
59  
60

For peer review only

1  
2  
3  
4  
5  
6  
7  
8  
9  
10  
11  
12  
13  
14  
15  
16  
17  
18  
19  
20  
21  
22  
23  
24  
25  
26  
27  
28  
29  
30  
31  
32  
33  
34  
35  
36  
37  
38  
39  
40  
41  
42  
43  
44  
45  
46  
47  
48  
49  
50  
51  
52  
53  
54  
55  
56  
57  
58  
59  
60

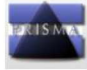

Figure 1. The flow diagram of studies selection.

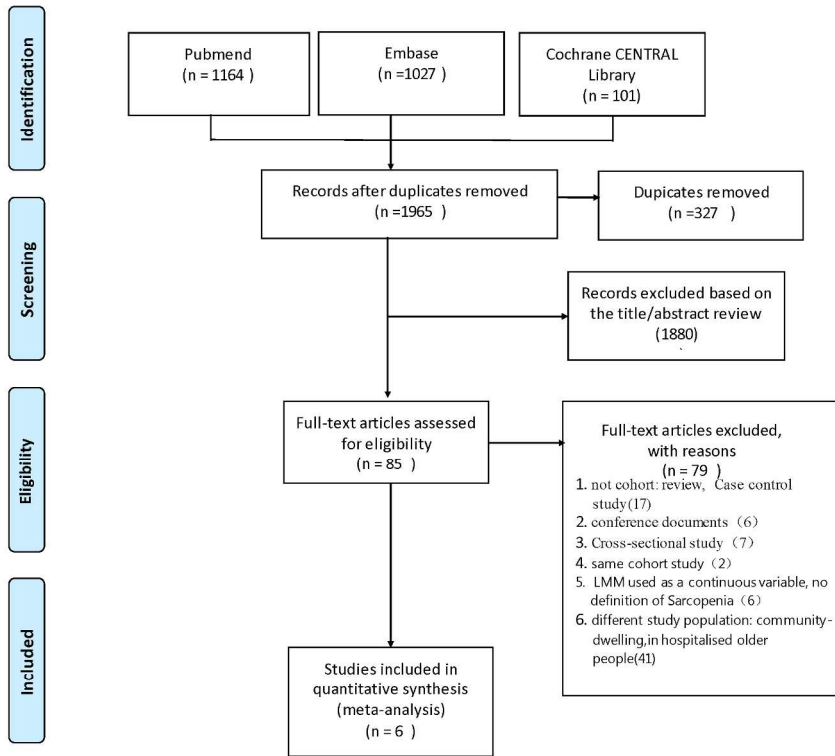

From: Moher D, Liberati A, Tetzlaff J, Altman DG, The PRISMA Group (2009). Preferred Reporting Items for Systematic Reviews and Meta-Analyses: The PRISMA Statement. PLoS Med 6(6): e1000097. doi:10.1371/journal.pmed1000097

For more information, visit [www.prisma-statement.org](http://www.prisma-statement.org).

Figure 1. The flow diagram of studies selection.

215x279mm (300 x 300 DPI)

1  
2  
3  
4  
5  
6  
7  
8  
9  
10  
11  
12  
13  
14  
15  
16  
17  
18  
19  
20  
21  
22  
23  
24  
25  
26  
27  
28  
29  
30  
31  
32  
33  
34  
35  
36  
37  
38  
39  
40  
41  
42  
43  
44  
45  
46  
47  
48  
49  
50  
51  
52  
53  
54  
55  
56  
57  
58  
59  
60

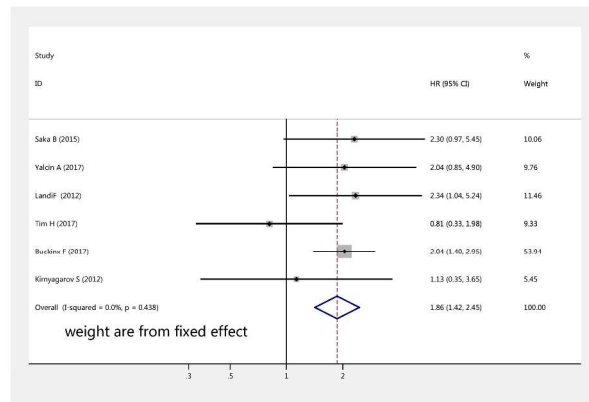

Figure 2. Meta-analysis of the association between Sarcopenia and mortality

Figure 2. Meta-analysis of the association between Sarcopenia and mortality

297x420mm (300 x 300 DPI)

1  
2  
3  
4  
5  
6  
7  
8  
9  
10  
11  
12  
13  
14  
15  
16  
17  
18  
19  
20  
21  
22  
23  
24  
25  
26  
27  
28  
29  
30  
31  
32  
33  
34  
35  
36  
37  
38  
39  
40  
41  
42  
43  
44  
45  
46  
47  
48  
49  
50  
51  
52  
53  
54  
55  
56  
57  
58  
59  
60

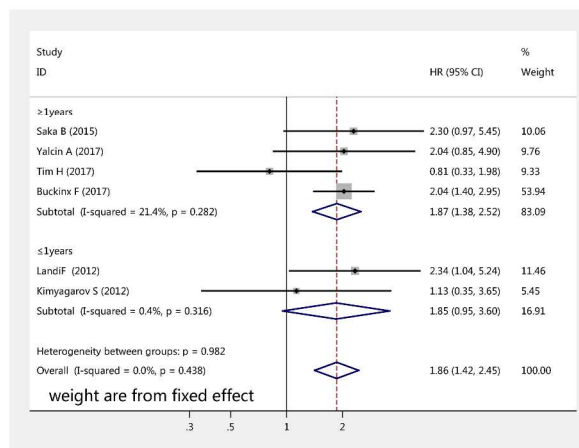

Figure 3. Subgroup analyses of the meta-analysis according to length of follow-up

Figure 3. Subgroup analyses of the meta-analysis according to length of follow-up

297x420mm (300 x 300 DPI)

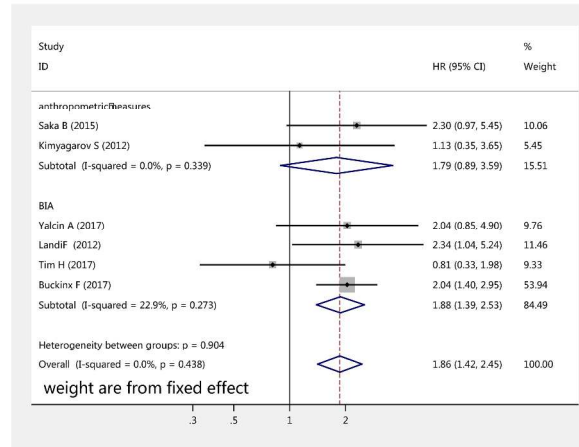

Figure 4. Subgroup analyses of the meta-analysis according to different diagnosis tools for muscle mass.

Figure 4. Subgroup analyses of the meta-analysis according to different diagnosis tools for muscle mass.

297x420mm (300 x 300 DPI)



1  
2  
3  
4  
5  
6  
7  
8  
9  
10  
11  
12  
13  
14  
15  
16  
17  
18  
19  
20  
21  
22  
23  
24  
25  
26  
27  
28  
29  
30  
31  
32  
33  
34  
35  
36  
37  
38  
39  
40  
41  
42  
43  
44  
45  
46  
47  
48  
49  
50  
51  
52  
53  
54  
55  
56  
57  
58  
59  
60

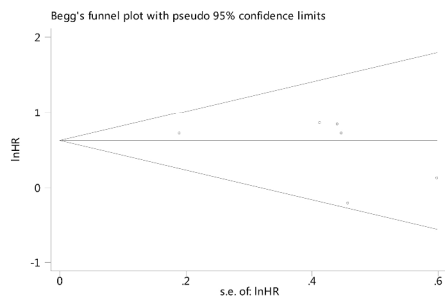

Figure 5. Funnel plot of sarcopenia and all-cause mortality among older nursing home residents

Figure 5. Funnel plot of sarcopenia and all-cause mortality among older nursing home residents

297x420mm (300 x 300 DPI)

1  
2  
3  
4  
5  
6  
7  
8  
9  
10  
11  
12  
13  
14  
15  
16  
17  
18  
19  
20  
21  
22  
23  
24  
25  
26  
27  
28  
29  
30  
31  
32  
33  
34  
35  
36  
37  
38  
39  
40  
41  
42  
43  
44  
45  
46  
47  
48  
49  
50  
51  
52  
53  
54  
55  
56  
57  
58  
59  
60

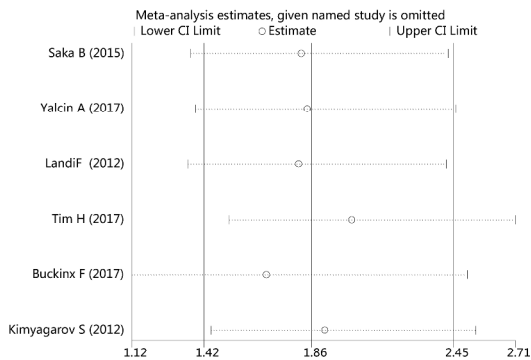

Figure.6 Sensitivity analysis of all studies.

Figure.6 Sensitivity analysis of all studies.

297x420mm (300 x 300 DPI)

1  
2  
3 MEDLINE (via PubMed)

- 4 #1: Search sarcopenia\*  
5  
6 #2: Search "Sarcopenia"[Mesh]  
7 #3: Search ("Sarcopenia"[Mesh]) OR sarcopenia\*  
8 #4: Search "Mortality"[Mesh]  
9 #5: Search mortality\*  
10 #6: Search "Death"[Mesh]  
11 #7: Search death\*  
12 #8: Search survival\*  
13 #9: Search "Survival"[Mesh]  
14 #10: Search (((("Survival"[Mesh]) OR survival\*) OR death\*) OR "Death"[Mesh]) OR mortality\*) OR  
15 "Mortality"[Mesh]  
16 #11: Search ((((((("Survival"[Mesh]) OR survival\*) OR death\*) OR "Death"[Mesh]) OR mortality\*)  
17 OR "Mortality"[Mesh])) AND (("Sarcopenia"[Mesh]) OR sarcopenia\*)  
18  
19  
20  
21  
22

23 Cochrane CENTRAL Library

- 24  
25 #1: Search sarcopenia\*  
26 #2: Search MeSH descriptor: [Sarcopenia] explode all trees  
27 #3: #1OR #2  
28 #4: Search MeSH descriptor: [mortality] explode all trees  
29 #5: Search mortality\*  
30 #6: Search MeSH descriptor: [death] explode all trees  
31 #7: Search death\*  
32 #8: Search survival\*  
33 #9: Search MeSH descriptor: [survival] explode all trees  
34 #10: #4 OR #5 OR #6 OR #7 OR #8 OR #9  
35 #11: # 3 AND #10  
36  
37  
38  
39  
40

41 EMBASE

- 42  
43 #1: 'sarcopenia'/exp  
44 #2: 'mortality'/exp  
45 #3: 'death'/exp  
46 #4: 'survival'/exp  
47 #5: #2 OR #3 OR #4  
48 #6: #1 AND #5  
49  
50  
51  
52  
53  
54  
55  
56  
57  
58  
59  
60

## MOOSE Checklist for Meta-analyses of Observational Studies

| Item No                                     | Recommendation                                                                                                                                                                                                                                                               | Reported on Page No |
|---------------------------------------------|------------------------------------------------------------------------------------------------------------------------------------------------------------------------------------------------------------------------------------------------------------------------------|---------------------|
| Reporting of background should include      |                                                                                                                                                                                                                                                                              |                     |
| 1                                           | Problem definition                                                                                                                                                                                                                                                           | 3                   |
| 2                                           | Hypothesis statement                                                                                                                                                                                                                                                         | 3                   |
| 3                                           | Description of study outcome(s)                                                                                                                                                                                                                                              | 3                   |
| 4                                           | Type of exposure or intervention used                                                                                                                                                                                                                                        | 3                   |
| 5                                           | Type of study designs used                                                                                                                                                                                                                                                   | 3                   |
| 6                                           | Study population                                                                                                                                                                                                                                                             | 4                   |
| Reporting of search strategy should include |                                                                                                                                                                                                                                                                              |                     |
| 7                                           | Qualifications of searchers (eg, librarians and investigators)                                                                                                                                                                                                               | None                |
| 8                                           | Search strategy, including time period included in the synthesis and key words                                                                                                                                                                                               | 4                   |
| 9                                           | Effort to include all available studies, including contact with authors                                                                                                                                                                                                      | 4                   |
| 10                                          | Databases and registries searched                                                                                                                                                                                                                                            | 4                   |
| 11                                          | Search software used, name and version, including special features used (eg, explosion)                                                                                                                                                                                      | 4                   |
| 12                                          | Use of hand searching (eg, reference lists of obtained articles)                                                                                                                                                                                                             | 4                   |
| 13                                          | List of citations located and those excluded, including justification                                                                                                                                                                                                        | 4                   |
| 14                                          | Method of addressing articles published in languages other than English                                                                                                                                                                                                      | 5                   |
| 15                                          | Method of handling abstracts and unpublished studies                                                                                                                                                                                                                         | 6                   |
| 16                                          | Description of any contact with authors                                                                                                                                                                                                                                      | 6                   |
| Reporting of methods should include         |                                                                                                                                                                                                                                                                              |                     |
| 17                                          | Description of relevance or appropriateness of studies assembled for assessing the hypothesis to be tested                                                                                                                                                                   | 5                   |
| 18                                          | Rationale for the selection and coding of data (eg, sound clinical principles or convenience)                                                                                                                                                                                | 5                   |
| 19                                          | Documentation of how data were classified and coded (eg, multiple raters, blinding and interrater reliability)                                                                                                                                                               | 5                   |
| 20                                          | Assessment of confounding (eg, comparability of cases and controls in studies where appropriate)                                                                                                                                                                             | 5                   |
| 21                                          | Assessment of study quality, including blinding of quality assessors, stratification or regression on possible predictors of study results                                                                                                                                   | 5                   |
| 22                                          | Assessment of heterogeneity                                                                                                                                                                                                                                                  | 6                   |
| 23                                          | Description of statistical methods (eg, complete description of fixed or random effects models, justification of whether the chosen models account for predictors of study results, dose-response models, or cumulative meta-analysis) in sufficient detail to be replicated | 6                   |
| 24                                          | Provision of appropriate tables and graphics                                                                                                                                                                                                                                 | 7                   |
| Reporting of results should include         |                                                                                                                                                                                                                                                                              |                     |
| 25                                          | Graphic summarizing individual study estimates and overall estimate                                                                                                                                                                                                          | 7                   |
| 26                                          | Table giving descriptive information for each study included                                                                                                                                                                                                                 | 7                   |
| 27                                          | Results of sensitivity testing (eg, subgroup analysis)                                                                                                                                                                                                                       | 8                   |
| 28                                          | Indication of statistical uncertainty of findings                                                                                                                                                                                                                            | None                |

| Item No                                 | Recommendation                                                                                                            | Reported on Page No |
|-----------------------------------------|---------------------------------------------------------------------------------------------------------------------------|---------------------|
| Reporting of discussion should include  |                                                                                                                           |                     |
| 29                                      | Quantitative assessment of bias (eg, publication bias)                                                                    | 9                   |
| 30                                      | Justification for exclusion (eg, exclusion of non-English language citations)                                             | 9                   |
| 31                                      | Assessment of quality of included studies                                                                                 | None                |
| Reporting of conclusions should include |                                                                                                                           |                     |
| 32                                      | Consideration of alternative explanations for observed results                                                            | 11                  |
| 33                                      | Generalization of the conclusions (ie, appropriate for the data presented and within the domain of the literature review) | 11                  |
| 34                                      | Guidelines for future research                                                                                            | 11                  |
| 35                                      | Disclosure of funding source                                                                                              | 12                  |

From: Stroup DF, Berlin JA, Morton SC, et al, for the Meta-analysis Of Observational Studies in Epidemiology (MOOSE) Group. Meta-analysis of Observational Studies in Epidemiology. A Proposal for Reporting. *JAMA*. 2000;283(15):2008-2012. doi: 10.1001/jama.283.15.2008.

Transcribed from the original paper within the NEUROSURGERY® Editorial Office, Atlanta, GA, United States. August 2012.

# BMJ Open

## Sarcopenia as a predictor of all-cause mortality among older nursing home residents: a systematic review and meta-analysis

|                                 |                                                                                                                                                                                                                                                                                                                                                                                                                                                                                                                                                                                                                                                                                                                                                                                                                                                                                      |
|---------------------------------|--------------------------------------------------------------------------------------------------------------------------------------------------------------------------------------------------------------------------------------------------------------------------------------------------------------------------------------------------------------------------------------------------------------------------------------------------------------------------------------------------------------------------------------------------------------------------------------------------------------------------------------------------------------------------------------------------------------------------------------------------------------------------------------------------------------------------------------------------------------------------------------|
| Journal:                        | <i>BMJ Open</i>                                                                                                                                                                                                                                                                                                                                                                                                                                                                                                                                                                                                                                                                                                                                                                                                                                                                      |
| Manuscript ID                   | bmjopen-2017-021252.R3                                                                                                                                                                                                                                                                                                                                                                                                                                                                                                                                                                                                                                                                                                                                                                                                                                                               |
| Article Type:                   | Research                                                                                                                                                                                                                                                                                                                                                                                                                                                                                                                                                                                                                                                                                                                                                                                                                                                                             |
| Date Submitted by the Author:   | 15-Aug-2018                                                                                                                                                                                                                                                                                                                                                                                                                                                                                                                                                                                                                                                                                                                                                                                                                                                                          |
| Complete List of Authors:       | Zhang, Xiaoming; Department of Emergency, the affiliated Baoan Hospital of Southern Medical University, People's hospital of Baoan ShenZhen<br>Wang, Conghua; Department of Emergency, the affiliated Baoan Hospital of Southern Medical University, People's hospital of Baoan ShenZhen<br>Dou, Qingli; Department of Emergency, the affiliated Baoan Hospital of Southern Medical University, People's hospital of Baoan ShenZhen<br>Zhang, Wenwu; Department of Emergency, the affiliated Baoan Hospital of Southern Medical University, People's hospital of Baoan ShenZhen<br>Yang, Yunzhi; Department of Nursing, the affiliated Baoan Hospital of Southern Medical University, People's hospital of Baoan ShenZhen,<br>Department of Nursing<br>Xie, Xiaohua; Department of Nursing, the affiliated hospital of ShenZhen University, the second people's hospital of ShenZhen |
| <b>Primary Subject Heading</b>: | Geriatric medicine                                                                                                                                                                                                                                                                                                                                                                                                                                                                                                                                                                                                                                                                                                                                                                                                                                                                   |
| Secondary Subject Heading:      | Geriatric medicine, Nursing                                                                                                                                                                                                                                                                                                                                                                                                                                                                                                                                                                                                                                                                                                                                                                                                                                                          |
| Keywords:                       | Sarcopenia, All-cause mortality, Nursing Home, Meta-analysis, Sarcopenia; All-cause mortality; Nursing Home; Meta-analysis                                                                                                                                                                                                                                                                                                                                                                                                                                                                                                                                                                                                                                                                                                                                                           |
|                                 |                                                                                                                                                                                                                                                                                                                                                                                                                                                                                                                                                                                                                                                                                                                                                                                                                                                                                      |

SCHOLARONE™  
Manuscripts

1  
2  
3 **Sarcopenia as a predictor of all-cause mortality among older nursing home**  
4 **residents: a systematic review and meta-analysis**  
5

6 XiaoMingZhang<sup>1†</sup>, CongHuaWang<sup>1†</sup>, QingLiDou<sup>1</sup>, WenWuZhang<sup>1</sup>, YunZhi Yang<sup>2\*</sup>  
7  
8 XiaoHua Xie<sup>3</sup>  
9

10 <sup>1</sup>Department of Emergency, the affiliated Baoan Hospital of Southern Medical  
11 University, People's hospital of Baoan ShenZhen  
12  
13

14 <sup>2</sup>Department of Nursing, the affiliated Baoan Hospital of Southern Medical University,  
15 People's hospital of Baoan ShenZhen  
16  
17

18 <sup>3</sup>Department of Nursing, the affiliated hospital of ShenZhen University, the second  
19 people's hospital of ShenZhen  
20  
21

22  
23 <sup>†</sup>Co-first authors  
24

25 <sup>\*</sup>Corresponding author  
26

27 Correspondence to: zjhkbcg@163.com. Mail Address: No. 118, longjing, Baoan  
28 District, Shenzhen 518101, China. Tel: +86- 1518135397.  
29  
30  
31  
32  
33  
34  
35  
36  
37  
38  
39  
40  
41  
42  
43  
44  
45  
46  
47  
48  
49  
50  
51  
52  
53  
54  
55  
56  
57  
58  
59  
60

## Abstract

**Objectives:** This study aims to review the evidence of sarcopenia as a predictor of all-cause mortality among nursing home residents.

**Design:** systematic review and meta-analysis of observational cohort studies

**Data sources:** PubMed, EMBASE, and the Cochrane Library databases were searched for relevant articles.

**Participants:** Nursing home residents.

**Primary and secondary outcome measures:** All-cause mortality

**Data analysis:** Summary-adjusted hazard ratios (HRs) or risk ratios (RRs) were calculated by fixed-effects model. The risk of bias was assessed by Newcastle-Ottawa Scale.

**Results:** Of 2,292 studies identified through the systematic review, six studies (1494 participants) were included in the meta-analysis. Sarcopenia was significantly associated with a higher risk for all-cause mortality among nursing home residents (pooled HR=1.86, 95% confidence interval [95% CI] =1.42-2.45,  $p<0.001$ ,  $I^2=0$ ). In addition, the subgroup analysis demonstrated that sarcopenia was associated with all-cause mortality (pooled HR 1.87, [95%CI] =1.38- 2.52,  $p<0.001$ ) when studies with a follow-up period of 1 year or more were analysed; however, this was not found for studies with the follow-up period less than 1 year. Furthermore, sarcopenia was significantly associated with the risk of mortality among older nursing home residents when using bioelectrical impedance analysis (BIA) to diagnosis muscle mass (pooled HR=1.88, 95% CI = 1.39- 2.53,  $p<0.001$ ); whereas, it was not found when anthropometric measures was used to diagnosis muscle mass.

**Conclusion:** Sarcopenia is a significant predictor of all-cause mortality among older nursing home residents. Therefore, it is important to diagnose and treat sarcopenia to reduce mortality rates among nursing home residents.

**PROSPEERO registration number:** CRD42018081668

**Key words:** Sarcopenia; All-cause mortality; Nursing Home; Meta-analysis



### Strengths and limitations of this study

1. To the best of our knowledge, it is the first meta-analysis to explore the relationship between sarcopenia and all-cause mortality among elderly nursing home residents.
2. An extensive search process in an electronic database was used and methodological quality was assessed; we also tested the heterogeneity and publication bias and performed sensitivity analysis among the included studies.
3. This systematic review and meta-analysis assessed the overall quality of the evidence by using Newcastle Ottawa Scale (NOS) approach for prospective observational studies and conducted a meta-analysis and subgroup analysis.
4. The number of studies included in this analysis were insufficient, and the size sample was relatively small.
5. Different cutoff values for the muscle mass might affect the relationship between sarcopenia and all-cause mortality.

## 1. Introduction

Sarcopenia is a common syndrome characterised by a loss of muscle mass and strength with functional impairment and adverse health outcomes due to cumulative deficits of multiple systems<sup>1</sup>. Nursing home residents are at a particularly high risk for sarcopenia<sup>2</sup>. According to studies, the prevalence of sarcopenia was 1-29% for community-dwelling older adults, 14–85.4% in nursing homes<sup>2-4</sup> and 10-24.3% for those in hospitals<sup>5</sup>. Sarcopenia leads to a worse outcome in elderly people, including physical disability, falls, fractures, poor quality of life, mortality and hospitalisation<sup>6-8</sup>. Among these, mortality might be considered the most important outcome in elderly people. So far, the relationship between mortality and operational criteria that define sarcopenia has been well described in community-dwelling older adults and hospitalised patients. A recent meta-analysis study, Liu<sup>9</sup> *et al.*, analysed sarcopenia and mortality and concluded that sarcopenia is a predictor of all-cause mortality among

1  
2  
3 community-dwelling older people. However, there is no consistent conclusion  
4 regarding the relationship between sarcopenia and mortality among nursing home  
5 residents. It has been shown that the mortality rate in nursing homes<sup>10</sup> is approximately  
6 2-fold higher than that in the community<sup>11-13</sup>; therefore, it is very important to confirm  
7 the risk factors for mortality among nursing home residents.  
8  
9  
10  
11

12 Several studies found that elderly people with sarcopenia were predictors of  
13 all-cause mortality among nursing home residents<sup>14, 15</sup>. However, some studies did not  
14 find any significant relationship between sarcopenia and all-cause mortality<sup>16-19</sup>. Given  
15 the observed contradictory relationship between sarcopenia and all-cause mortality  
16 among nursing home residents in some studies, further studies are needed. However, no  
17 systematic reviews of meta-analysis studies on this topic have been conducted in the  
18 literature. Therefore, our study aims to identify and compare prospective cohort studies  
19 examining sarcopenia as a predictor of all-cause mortality among nursing home  
20 residents according to the MOOSE guidelines  
21  
22  
23  
24  
25  
26  
27  
28

## 29 **2. Materials and methods**

30 This meta-analysis was registered with the international prospective Register for  
31 Systemic Reviews (CRD42018081668) and conducted according to the MOOSE  
32 guidelines<sup>20</sup>.  
33  
34  
35

### 36 **2.1. Search strategy and selection criteria**

37 A systematic literature search was conducted in MEDLINE (via PubMed 1946 to  
38 November 2017), EMBASE (via EMBASE November 2017) and Cochrane  
39 CENTRAL Library (via Cochrane Library November 2017). The search strategy was  
40 tailored according to each database. We used a combination of key words such as  
41 mortality (mortality\*), OR death (death\*), OR survival (survival\*) and sarcopenia  
42 (sarcopenia\*), as well as MeSH terms. We also used subject terms and truncation  
43 symbols in our search strategy. We searched the potential grey studies through Google  
44 Scholar. Furthermore, we carried out a manual search on the references of included  
45 studies. The full search strategy for three databases has been provided as a  
46 supplementary file.  
47  
48  
49  
50  
51  
52  
53  
54  
55  
56

## 2.2. Study selection

These studies which was identified by our search strategy were reviewed by teams of two independently blinded investigators (Zhang XM and Wang CH) who evaluated each title and abstract. In case of disagreement (whether to include or exclude studies), the issue was discussed and a third reviewer evaluated the study until the reviewers reached consensus.

## 2.3. Inclusion and exclusion criteria

The following eligibility and exclusion criteria were prespecified. Studies had to fulfil the following four inclusion criteria: (1) prospective cohort studies, (2) studies investigating whether sarcopenia was a predictor of mortality, (3) studies reporting clear diagnostic criteria for sarcopenia, (4) type of participant: elderly adult in nursing home or nursing care. Exclusion criteria were as follows: (1) Type of participant: community-dwelling older people (aged 65 years or older) or hospitalised older people; (2) article type: only abstract, letters and laboratory research; review articles; (3) insufficient data; (4) other languages of studies, except English; (5) no clear definition of sarcopenia.

## 2.4. Data extraction

Two investigators (Zhang XM, Wang CH) independently abstracted the data from the selected studies using a standardised data-abstraction form. The following information was extracted from included papers: author, country, year of publication, demographic characteristics of participants (e.g., sample size, male proportion), measurement methods of sarcopenia, follow-up period, Adjusted variable, and study quality. The reviewers cross-checked all extracted data. Disagreements were resolved by discussion until consensus was reached.

## 2.5. Assessment of risk bias

Assessment of risk of bias was performed by two independent reviewers (Zhang XM, Wang CH) according to the Newcastle Ottawa Scale (NOS)<sup>21</sup>: (1) representativeness of the exposed cohort, (2) comparability of group, (3) blinding of investigators who measured outcomes, (4) the time and completeness of follow-up, (5)

1  
2  
3 contamination bias, and (6) other potential sources of bias. The total score of the scale is  
4 9 points. When the total score is  $\geq 5$  points, it is considered as a high-quality research.

## 6 **2.6. Statistical analysis**

8 The STATA version 14.0 (Stata Corp., College Station, TX, USA) was  
9 independently used for all analyses by two authors (Zhang XM, Dou QL). Hazard ratios  
10 (HRs), odds ratio (ORs) and their 95% CIs of mortality for sarcopenia compared with  
11 non-sarcopenia were extracted from studies for future meta-analysis. RR was  
12 considered equivalent to HR in our prospective cohort studies, which was reported in  
13 Carole Willi's<sup>22</sup> study and Ahmed N Mahmoud's study<sup>23</sup>. If a study reported the effect  
14 size as an OR, it was converted to RR using a previously described formula<sup>24</sup>. All the  
15 effect of HR or RR was converted to  $\ln(\text{HR})$  or  $\ln(\text{RR})$  for ratio in meta-analysis,  
16 Subgroup analyses were conducted by different diagnosis tools for muscle mass and  
17 follow-up period if there was more than one study in the subgroup. The statistical  
18 heterogeneity among the included studies was examined with Cochran's Q statistic  
19 using chi-square and  $I^2$  statistics, and  $I^2$  value of 25%, 50% and 75% represented the  
20 cut-off of low, moderate and high heterogeneity, respectively. If heterogeneity was  
21 found to be reasonably high between studies, the random-effects model was used.  
22 Otherwise, the fixed-effects model was used. Results were illustrated using forest plots,  
23 and Begg's Test was done to plot the log HR against its standard error for assessment of  
24 potential publication bias.

## 39 **2.7. Patient and Public Involvement**

40 The patients or public were not involved in the study.

## 43 **3. Results**

### 45 **3.1. Search results**

46 The literature search strategy initially identified 2,292 articles. After removal of  
47 duplicates, 1,965 articles were screened for potential eligibility. A total of 85  
48 publications remained for further consideration. Then we screened titles and abstracts  
49 and removed unrelated articles. Of these articles, 30 were removed because of non-  
50 cohort studies (e.g., review articles, conference documents, cross-sectional study,  
51  
52  
53  
54  
55  
56

1  
2  
3 case-control study), and six were removed because they had no clear definition of  
4 sarcopenia; moreover, 41 were removed on account of different study population:  
5 community-dwelling older people, patients in hospital, and used the same cohorts (n =  
6 2). These studies were screened according to the predefined inclusion and exclusion  
7 criteria for inclusion in the meta-analysis, resulting in a total of six eligible studies  
8 (Figure 1).  
9

### 14 3.2 Included studies

16 Six prospective cohort studies were included in our meta-analysis with 1,494 total  
17 participants. Study characteristics of included papers are displayed in table 1. Two  
18 studies were conducted in Turkey<sup>25, 26</sup>, one study in Italy<sup>27-29</sup>, one study in Australia<sup>30</sup>,  
19 one study in Belgium and one study in Israel. All the studies selected all-cause  
20 mortality as the clinical outcome and five studies used the sarcopenia criteria of  
21 European Working Group for Sarcopenia (EWGSOP), the other used NIH-sponsored  
22 workshop<sup>31</sup> to diagnose sarcopenia. The EWGSOP<sup>1</sup> recommends using the presence of  
23 both low muscle function (strength or performance) and low muscle mass for the  
24 diagnosis of sarcopenia. Thus, diagnosis of sarcopenia in the present study required the  
25 documentation of low muscle mass plus the documentation of either low muscle  
26 strength or low physical performance. The prevalence of sarcopenia ranged from 32.8  
27 to 73.3%. The largest study consisted of 662 men and women, and the smallest cohort  
28 had only 58 individuals. Follow-up periods were no longer varying from 6 months to 24  
29 months, and the adjusted HR was displayed in four studies, and one used OR and the  
30 other used RR. Table 2 shows the different tools and cut-off of muscle mass, muscle  
31 strength and physical performance. Four studies used bioelectrical impedance analysis  
32 (BAI) as a diagnostic criterion for muscle mass, and the other two studies used  
33 anthropometric measures as diagnostic criteria.  
34  
35  
36  
37  
38  
39  
40  
41  
42  
43  
44  
45  
46  
47  
48

### 49 3.3 Quality assessment

51 The methodological quality evaluation using NOS of all items is shown in Table 3.  
52 The score of each study ranged from six to nine. The scores of five studies were more  
53 than seven.  
54  
55  
56

### 3.4 Sarcopenia as a predictor of mortality

#### 3.4.1 Meta-analysis of studies

Six studies examined the association between sarcopenia and mortality among nursing home residents. The pooled HRs values were calculated by fixed-effects models. As show in Figure 2, the HRs of all-cause mortality for sarcopenia versus non-sarcopenia was 1.86 (95%CI=1.42-2.45,  $p<0.001$ ). No significant heterogeneity was observed across these studies (Q-value=4.82, degree of freedom=5,  $I^2=0\%$ ,  $p=0.438$ ).

#### 3.4.2 Subgroup analysis

The six studies with HR of all-cause mortality risks for sarcopenia among nursing home residents were further analysed by subgroup. Figure 3 compares all-cause mortality risk stratified by length of follow-up for sarcopenia. Two studies that followed up 231 cases for a period of less than 1 year (pooled HR 1.85, 95%CI 0.95–3.60,  $p=0.070$ ); whereas the analysis of other four studies that followed up 1263 cases for a period of 1 year or more (pooled HR 1.87, 95%CI 1.38-2.52,  $p<0.001$ ). Figure 4 shows sarcopenia was significantly associated with the risk of mortality among nursing home residents when using bioelectrical impedance analysis (BIA) to diagnose muscle mass (pooled effect size=1.88,95% CI =1.39- 2.53,  $p<0.001$ ), whereas it was not associated when using anthropometric measures to diagnosis muscle mass (pooled effect size=1.79,95% CI=0.89-3.59,  $p=0.100$ ).

#### 3.4.3 Publication bias assessment

There was no significant publication bias among the studies using Begg's test:  $p=0.386$  (Figure 5).

#### 3.4.4 Sensitivity analysis of all studies.

We conducted a sensitivity analysis of sarcopenia and mortality by omitting one of the included studies each time, and poing the others together to find which study would influence the main pooled HR. No statistically significant changes were found, as shown in Figure 6.

## 4. Discussion

1  
2  
3 In this meta-analysis, we found evidence suggesting the risk of all-cause mortality  
4 among nursing home residents with sarcopenia was higher than that among nursing  
5 home residents without sarcopenia. To the best of our knowledge, this is the first  
6 meta-analysis to explore the relationship between sarcopenia and all-cause mortality  
7 among nursing home residents. Our study indicated assessing sarcopenia is really  
8 important among the elderly that live in nursing homes.  
9

10  
11  
12  
13  
14 Ping Liu<sup>9</sup> *et al.* implemented a systematic review and meta-analysis regarding the  
15 association of sarcopenia with mortality in 2016, published in 2017. However, this  
16 review included a population entirely of community-dwelling older people. So far,  
17 Shu-Fang Chang<sup>32</sup> and Beaudart<sup>33</sup> both performed a systematic review to evaluate the  
18 link between sarcopenia and all-cause mortality; however, there were some  
19 methodological shortcomings, such as various diagnostic criteria of sarcopenia, crude  
20 ORs as effect, various population involving community-dwelling older people and  
21 hospitalised patients. Although a subgroup of nursing home residents was analysed in  
22 Beaudart's study, there is only two studies that was assessed, which maybe  
23 underestimated or overestimated their result. Our review included six studies which  
24 focus only on the association of mortality and sarcopenia in nursing home residents.  
25 The results were stable and reliable after we tested the heterogeneity and publication  
26 bias and performed sensitivity analysis among the included studies.  
27  
28  
29  
30  
31  
32  
33  
34  
35  
36  
37

38 This meta-analysis of six cohort studies shows sarcopenia is an important  
39 predictor of all-cause mortality among nursing home residents. The pooled HR value of  
40 all-cause mortality was 1.86 (95%CI=1.41-2.45,  $p<0.001$ ,  $I^2 = 0\%$ ). The small  $I^2$   
41 suggesting no significant heterogeneity was shown across these studies. In addition, our  
42 study's pooled HR value is higher than that of Ping Liu<sup>9</sup> (1.60 95%CI: 1.24–2.06); the  
43 primary reason was the different type of population. Those living in a nursing home  
44 usually had worse health conditions and more comorbidities, more disability and more  
45 geriatric syndromes, such as cognitive dysfunction and malnutrition<sup>17, 34-36</sup>. This  
46 comprehensive risk factor may aggravate the process of sarcopenia.  
47  
48  
49  
50  
51  
52  
53

54 In our present study, the prevalence of sarcopenia varied from 32.8-73.3%. The  
55  
56



1  
2  
3 difference was mainly due to the mean age, various population and different diagnostic  
4 tools, particularly the ways that researchers measured muscle mass. A previous study  
5 showed that sarcopenia was associated with mortality when BIA was used to diagnose  
6 muscle mass<sup>37</sup>. In this present study, we confirmed that sarcopenia was associated with  
7 all-cause mortality using BIA to diagnose muscle mass; however, the association was  
8 not found when using anthropometric measures. According to the EWGSOP<sup>1</sup>, BIA is  
9 the most common tool for diagnosing muscle mass; moreover, the test is inexpensive,  
10 easy to use, readily reproducible and appropriate for both ambulatory and bedridden  
11 patients, which may be considered a portable alternative to DXA (Dual Energy X-ray  
12 Absorptiometry) in nursing homes. However, the method of anthropometric measures  
13 was based on mid-upper-arm circumference and skin fold thickness<sup>38</sup>; therefore,  
14 age-related changes in fat deposits and loss of skin elasticity contribute to errors of  
15 estimation in older nursing home residents, which are prone to produce errors<sup>39</sup>.  
16 Furthermore, anthropometric measures were not recommended for routine use in the  
17 diagnosis of sarcopenia.  
18  
19  
20  
21  
22  
23  
24  
25  
26  
27  
28  
29

30  
31 It has been demonstrated that length follow-up could influence the association  
32 between sarcopenia and mortality<sup>9</sup>. Our study showed that the subgroup of length of  
33 follow-up analysis demonstrated that follow-up period of 1 year or more was associated  
34 with all-cause mortality (pooled HR=1.87, 95%CI 1.38-2.52, p<0.001); however, it was  
35 not found with the follow-up period of less than 1 year (pooled HR=1.85, 95%CI  
36 0.95-3.60, p=0.070). It is noticed that there were only 231 cases in the two studies with  
37 the follow-up period of less than 1 year and it is likely that the numbers of studies and  
38 included cases for short term analysis were too small to have a significant result.  
39 Therefore, more perspective cohort studies about this issue must be conducted in the  
40 future.  
41  
42  
43  
44  
45  
46  
47  
48

49 The underlying mechanisms between sarcopenia and a higher risk of all-cause  
50 mortality were unable to draw a conclusion; some aspects should be mentioned at least.  
51 Firstly, the association between sarcopenia and mortality may be explained by the  
52 hypothesised adverse effects of a low muscle mass in older people. Several studies  
53  
54  
55  
56  
57  
58  
59  
60



1  
2  
3 showed that low muscle mass is highly associated with increased mortality<sup>40-42</sup>. In  
4 addition, elderly people in nursing homes are at high risk of malnutrition<sup>43</sup>, which  
5 aggravates low muscle mass, resulting in an increased mortality rate. Secondly,  
6 sarcopenia is linked to multiple factors ranging from aging process<sup>44</sup>, multiple chronic  
7 health conditions, unhealthy lifestyle<sup>45</sup>, hormonal factors<sup>46</sup>, inflammation<sup>47</sup> and so on<sup>48</sup>.  
8  
9 Meanwhile, the above factors are considered to be linked with mortality and the  
10 development of multifactor worsened the situation of sarcopenia, leading to a passive  
11 adaption to adversity or external stressors, which in turn generate increased poor  
12 adverse outcomes<sup>49</sup>. Thirdly, according to the study of Fried<sup>50</sup> *et al.*, sarcopenia played  
13 a critical etiologic role in the frailty process, which is related, through frailty, to  
14 pernicious consequences, for instance, recurrent falls, bone fracture, disability,  
15 multiple emergency room visits and hospital admissions and eventually death<sup>51, 52</sup>.  
16 Moreover, sarcopenia is considered to increase the risk of falls among the elderly<sup>53</sup>, and  
17 falls were the major causes of death in nursing home residents<sup>54</sup>. Sarcopenia is a  
18 geriatric syndrome rather than a disease; the mechanism of sarcopenia is very complex,  
19 which needs more research to explore.  
20  
21  
22  
23  
24  
25  
26  
27  
28  
29  
30  
31

32 Our meta-analysis review has multiple strengths and some limitations. One  
33 strength was that we used an extensive search process in electronic databases and  
34 assessed methodological quality and tested the heterogeneity and publication bias  
35 among the included studies. Another strength was that the included original studies  
36 were all of prospective design, which minimized the possibility of recall bias and  
37 selection bias. However, our study also has some limitations. Firstly, two included  
38 studies did not directly report the HR in the sarcopenia group versus the non-sarcopenia  
39 group, but used an approximation of OR to RR, and from RR to HR in the sarcopenia  
40 group, which might not show an accurate HR value. Therefore, this approach may lead  
41 to method heterogeneity. Another concern was that the cut-off for the muscle mass was  
42 different in some studies, which caused the prevalence of Sarcopenia to be various, thus  
43 potentially influenced the result. Thirdly, the number of included studies in this  
44 analysis was insufficient, and the sample size was relatively small. Fourthly, we  
45  
46  
47  
48  
49  
50  
51  
52  
53  
54  
55  
56

1  
2  
3 ignored the different adjusted confounding factors of the derived HR from different  
4 studies. Fifthly, the language of studies was limited to English, and consequently some  
5 data from important studies published in other languages have been ignored, which  
6 may result in potential language bias. In addition, the follow-up was relatively short for  
7 the necessary latency, which may underestimate the results.  
8  
9  
10  
11

## 12 **5. Conclusion**

13  
14 This study provides evidence that sarcopenia is a significant predictor of all-cause  
15 mortality among nursing home residents based on the comprehensive systematic  
16 review and meta-analysis. Further studies need to be provided with evidence for  
17 specific interventions to prevent and treat sarcopenia, which can reduce mortality in  
18 people living in a nursing home.  
19  
20  
21  
22

## 23 **6. Acknowledgements**

24  
25 The authors thank the staffs of the Department of Emergency Medicine, people's  
26 hospital of Baoan, Shenzhen for their guidance and support.  
27  
28

## 29 **7. Financial Support**

30  
31 This research received no specific grant from any funding agency, commercial or  
32 not-for-profit sectors. No sponsors had any role in the design, methods, subject  
33 recruitment, data collections, analysis or preparation of this manuscript.  
34  
35

## 36 **8. Contributors**

37  
38 Xiaoming Zhang was responsible for producing the initial draft of the manuscript.

39  
40 Conghua Wang was responsible for data extraction and for producing the initial  
41 draft of the manuscript.  
42

43  
44 Qingli Dou was responsible for data extraction.

45  
46 Wenwu Zhang was responsible for screening the papers and quality assessment.

47  
48 Xiao Hua Xie was responsible for screening the papers.

49  
50 Yunzhi Yang was responsible for quality assessment, statistical analysis and  
51 revision of the manuscript.  
52

53  
54 All the authors approved the final version of the manuscript

## 55 **9. Conflict of Interest**

None of the authors have any conflict of interest to declare.

## 10. Patient consent

Not required.

## 10. Data Sharing Statements

All the data can be found in the electronic databases (PubMed, EMBASE, and the Cochrane Library).

## References

1. Cruz-Jentoft AJ, Baeyens JP, Bauer JM, et al. Sarcopenia: European consensus on definition and diagnosis: Report of the european working group on sarcopenia in older people. *Age and ageing* 2010;39:412-423.
2. Landi F, Liperoti R, Fusco D, et al. Prevalence and risk factors of sarcopenia among nursing home older residents. *The journals of gerontology. Series A, Biological sciences and medical sciences* 2012;67:48-55.
3. Senior HE, Henwood TR, Beller EM, et al. Prevalence and risk factors of sarcopenia among adults living in nursing homes. *Maturitas* 2015;82:418-423.
4. Bahat G, Saka B, Tufan F, et al. Prevalence of sarcopenia and its association with functional and nutritional status among male residents in a nursing home in turkey. *The aging male : the official journal of the International Society for the Study of the Aging Male* 2010;13:211-214.
5. Cruz-Jentoft AJ, Landi F, Schneider SM, et al. Prevalence of and interventions for sarcopenia in ageing adults: A systematic review. Report of the international sarcopenia initiative (ewgsop and iwgs). *Age and ageing* 2014;43:748-759.
6. Beaudart C, McCloskey E, Bruyere O, et al. Sarcopenia in daily practice: Assessment and management. *BMC geriatrics* 2016;16:170.
7. Woo J. Sarcopenia. *Clinics in geriatric medicine* 2017;33:305-314.
8. Landi F, Liperoti R, Russo A, et al. Sarcopenia as a risk factor for falls in elderly individuals: Results from the ilsirente study. *Clinical nutrition (Edinburgh, Scotland)* 2012;31:652-658.
9. Liu P, Hao Q, Hai S, et al. Sarcopenia as a predictor of all-cause mortality among community-dwelling older people: A systematic review and meta-analysis *Maturitas*. 2017;103:16-22.
10. Goldberg TH, Botero A. Causes of death in elderly nursing home residents. *Journal of the American Medical Directors Association* 2008;9:565-567.
11. Kim JH, Lim S, Choi SH, et al. Sarcopenia: An independent predictor of mortality in community-dwelling older korean men. *The journals of gerontology. Series A, Biological sciences and medical sciences* 2014;69:1244-1252.
12. Wauters M, Elseviers M, Vaes B, et al. Mortality, hospitalisation, institutionalisation in community-dwelling oldest old: The impact of medication. *Archives of gerontology and geriatrics* 2016;65:9-16.

13. Arango-Lopera VE, Arroyo P, Gutierrez-Robledo LM, et al. Mortality as an adverse outcome of sarcopenia. *The journal of nutrition, health & aging* 2013;17:259-262.
14. Buckinx F, Croisier JL, Reginster JY, et al. Prediction of the incidence of falls and deaths among elderly nursing home residents: The senior study. *Journal of the American Medical Directors Association* 2017;19: 18-24.
15. Landi F, Liperoti R, Fusco D, et al. Sarcopenia and mortality among older nursing home residents. *Journal of the American Medical Directors Association* 2012;13:121-126.
16. Henwood T, Hassan B, Swinton P, et al. Consequences of sarcopenia among nursing home residents at long-term follow-up. *Geriatric nursing (New York, N.Y.)* 2017;38:406-411.
17. Saka B, Ozkaya H, Karisik E, et al. Malnutrition and sarcopenia are associated with increased mortality rate in nursing home residents: A prospective study. *European Geriatric Medicine* 2016;7:232-238.
18. Yalcin A, Aras S, Atmis V, et al. Sarcopenia and mortality in older people living in a nursing home in turkey. *Geriatrics and Gerontology International* 2017;17:1118-1124.
19. Kimyagarov S, Klid R, Fleissig Y, et al. Skeletal muscle mass abnormalities are associated with survival rates of institutionalized elderly nursing home residents. *The journal of nutrition, health & aging* 2012;16:432-436.
20. Stroup DF, Berlin JA, Morton SC, et al. Meta-analysis of observational studies in epidemiology: A proposal for reporting. Meta-analysis of observational studies in epidemiology (moose) group. *Jama* 2000;283:2008-2012.
21. Stang A. Critical evaluation of the newcastle-ottawa scale for the assessment of the quality of nonrandomized studies in meta-analyses. *European journal of epidemiology* 2010;25:603-605.
22. Willi C, Bodenmann P, Ghali WA, et al. Active smoking and the risk of type 2 diabetes: A systematic review and meta-analysis. *Jama* 2007;298:2654-2664.
23. Mahmoud AN, Mentias A, Elgendy AY, et al. Migraine and the risk of cardiovascular and cerebrovascular events: A meta-analysis of 16 cohort studies including 1 152 407 subjects 2018;8:e020498.
24. Grant RL. Converting an odds ratio to a range of plausible relative risks for better communication of research findings. *BMJ (Clinical research ed.)* 2014;348:f7450.
25. Chalhoub D, Cawthon P, Ensrud K, et al. Risk of non-spine fractures among men and women with sarcopenia, low bone mass or both. *Journal of Bone and Mineral Research* 2013;28.
26. Cawthon PM, Blackwell TL, Cauley J, et al. Evaluation of the usefulness of consensus definitions of sarcopenia in older men: Results from the observational osteoporotic fractures in men cohort study. *Journal of the American Geriatrics Society* 2015;63:2247-2259.
27. Scott D, Seibel M, Cumming R, Naganathan V, et al. Sarcopenic obesity and its temporal associations with changes in bone mineral density, incident falls, and fractures in older men: The concord health and ageing in men project. *Journal of Bone and Mineral Research* 2017;32:575-583.
28. Scott D, Chandrasekara SD, Laslett LL, et al. Associations of sarcopenic obesity and dynapenic obesity with bone mineral density and incident fractures over 5–10 years in community-dwelling older adults. *Calcified tissue international* 2016;99:30-42.
29. Yu R, Leung J, Woo J. Incremental predictive value of sarcopenia for incident fracture in an

- elderly chinese cohort: Results from the osteoporotic fractures in men (mros) study. *Journal of the American Medical Directors Association* 2014;15:551-558.
30. Hars M, Biver E, Chevalley T, et al. Low lean mass predicts incident fractures independently from frax: A prospective cohort study of recent retirees. *Journal of Bone and Mineral Research* 2016;31:2048-2056.
31. Roubenoff R. The pathophysiology of wasting in the elderly. *The Journal of nutrition* 1999;129:256s-259s.
32. Chang SF, Lin PL. Systematic literature review and meta-analysis of the association of sarcopenia with mortality. *Worldviews on evidence-based nursing* 2016;13:153-162.
33. Beaudart C, Zaaria M, Pasleau F, et al. Health outcomes of sarcopenia: A systematic review and meta-analysis. *PloS one* 2017;12:e0169548.
34. Hoffmann F, Kaduszkiewicz H, Glaeske G, et al. Prevalence of dementia in nursing home and community-dwelling older adults in germany. *Aging clinical and experimental research* 2014;26:555-559.
35. Ronald LA, McGregor MJ, McGrail KM, et al. Hospitalization rates of nursing home residents and community-dwelling seniors in british columbia. *Canadian journal on aging = La revue canadienne du vieillissement* 2008;27:109-115.
36. Benzinger P, Becker C, Kerse N, et al. Pelvic fracture rates in community-living people with and without disability and in residents of nursing homes. *Journal of the American Medical Directors Association* 2013;14:673-678.
37. Brown JC, Harhay MO, Harhay MN. Sarcopenia and mortality among a population-based sample of community-dwelling older adults. *Journal of cachexia, sarcopenia and muscle* 2016;7:290-298.
38. Rolland Y, Lauwers-Cances V, Cournot M, et al. Sarcopenia, calf circumference, and physical function of elderly women: A cross-sectional study. *Journal of the American Geriatrics Society* 2003;51:1120-1124.
39. Rolland Y, Czerwinski S, Abellan Van Kan G, et al. Sarcopenia: Its assessment, etiology, pathogenesis, consequences and future perspectives. *The journal of nutrition, health & aging* 2008;12:433-450.
40. Brown JC, Harhay MO, Harhay MN. Appendicular lean mass and mortality among prefrail and frail older adults. *The journal of nutrition, health & aging* 2017;21:342-345.
41. Cesari M, Pahor M, Lauretani F, et al. Skeletal muscle and mortality results from the inchiante study. *The journals of gerontology. Series A, Biological sciences and medical sciences* 2009;64:377-384.
42. Wijnhoven HA, van Bokhorst-de van der Schueren MA, Heymans MW, et al. Low mid-upper arm circumference, calf circumference, and body mass index and mortality in older persons. *The journals of gerontology. Series A, Biological sciences and medical sciences* 2010;65:1107-1114.
43. Vandewoude MF, Alish CJ, Sauer AC, et al. Malnutrition-sarcopenia syndrome: Is this the future of nutrition screening and assessment for older adults? *J Aging Res* 2012;2012:651570.
44. Marzetti E, Lees HA, Wohlgemuth SE, et al. Sarcopenia of aging: Underlying cellular mechanisms and protection by calorie restriction. *BioFactors (Oxford, England)*

- 2009;35:28-35.
45. Cruz-Jentoft AJ, Kiesswetter E, Drey M, et al. Nutrition, frailty, and sarcopenia. *Aging Clin Exp Res* 2017;29:43-48.
46. Martone AM, Lattanzio F, Abbatecola AM, et al. Treating sarcopenia in older and oldest old. *Curr Pharm Des* 2015;21:1715-1722.
47. Westbury LD, Fuggle NR, Syddall HE, et al. Relationships between markers of inflammation and muscle mass, strength and function: Findings from the hertfordshire cohort study. *Calcif Tissue Int.* 2018;102:287-295.
48. Malafarina V, Úriz-Otano F, Iniesta R, et al. Sarcopenia in the elderly: Diagnosis, physiopathology and treatment. *Maturitas* 2012;71:109-114.
49. Cruz-Jentoft AJ, Landi F, Topinkova E, et al. Understanding sarcopenia as a geriatric syndrome. *Curr Opin Clin Nutr Metab Care* 2010;13:1-7.
50. Fried LP, Tangen CM, Walston J, et al. Frailty in older adults: Evidence for a phenotype. *The journals of gerontology. Series A, Biological sciences and medical sciences* 2001;56:M146-156.
51. Wick JY. Understanding frailty in the geriatric population. *The Consultant pharmacist : the journal of the American Society of Consultant Pharmacists* 2011;26:634-645.
52. Bernabei R, Martone AM, Vetrano DL, et al. Frailty, physical frailty, sarcopenia: A new conceptual model. *Studies in health technology and informatics* 2014;203:78-84.
53. Matsumoto H, Tanimura C. Sarcopenia is a risk factor for falling in independently living japanese older adults: A 2-year prospective cohort study of the gaina study 2017;17:2124-2130.
54. Ibrahim JE, Bugeja L, Willoughby M, et al. Premature deaths of nursing home residents: An epidemiological analysis. *The Medical journal of Australia* 2017;206:442-447.

1  
2  
3  
4  
5  
6  
7  
8  
9  
10  
11  
12  
13  
14  
15  
16  
17  
18  
19  
20  
21  
22  
23  
24  
25  
26  
27  
28  
29  
30  
31  
32  
33  
34  
35  
36  
37  
38  
39  
40  
41  
42  
43  
44  
45  
46  
47

Table 1 Summary of Included Studies on Sarcopenia Associated with All-cause Mortality

| Author   | Country | Year | Male  | Sample number | Age of patients, years | Prevalence% | Follow-up period | mortality rate | Effect Measure | Adjusted or Crude HR/OR                                                                                                                                                                 | Quality* |
|----------|---------|------|-------|---------------|------------------------|-------------|------------------|----------------|----------------|-----------------------------------------------------------------------------------------------------------------------------------------------------------------------------------------|----------|
| Saka B   | Turkey  | 2015 | 51%   | 402           | 78.0±7.9               | 73.3        | 12 months        | 16.2%          | HR             | Adjusted                                                                                                                                                                                | 8        |
| Yalcin A | Turkey  | 2017 | 54.3% | 141           | 79.17±7.99             | 53.9        | 24 months        | 23.4%          | HR             | Age, sex, BMI, Calf circumference, MMSE, MNA, cerebrovascular diseases, osteoarthritis, chronic obstructive pulmonary disease, activity of daily living impairment, Diabetes, Dementia. | 7        |
| Landi F  | Italy   | 2012 | 25%   | 122           | 84.1±4.8               | 32.8        | 6 months         | 21.3%          | HRs            | Age, sex, cerebrovascular diseases, osteoarthritis, chronic obstructive pulmonary disease,                                                                                              | 8        |

1  
2  
3  
4  
5  
6  
7  
8  
9  
10  
11  
12  
13  
14  
15  
16  
17  
18  
19  
20  
21  
22  
23  
24  
25  
26  
27  
28  
29  
30  
31  
32  
33  
34  
35  
36  
37  
38  
39  
40  
41  
42  
43  
44  
45  
46  
47

|           |           |      |       |     |           |      |           |       |    |                                                                                                                                                                                                                                                                                                                                                                                              |                                     |  |
|-----------|-----------|------|-------|-----|-----------|------|-----------|-------|----|----------------------------------------------------------------------------------------------------------------------------------------------------------------------------------------------------------------------------------------------------------------------------------------------------------------------------------------------------------------------------------------------|-------------------------------------|--|
|           |           |      |       |     |           |      |           |       |    |                                                                                                                                                                                                                                                                                                                                                                                              | Activity of daily living impairment |  |
| Henwood T | Australia | 2017 | 29.3% | 58  | 85.7±8.2  | 51.7 | 18 months | 21.6% | RR | Age, sex, BMI, MNA, physical activity                                                                                                                                                                                                                                                                                                                                                        | 6                                   |  |
| Buckinx F | Belgium   | 2017 | 27.5% | 662 | 83.2±8.99 | 36.2 | 12 months | 15.9% | OR | Age, sex, BMI, Frailty, Waist circumference, Calf circumference, Arm circumference, Wrist circumference, Walking support, Drugs consumed, Medical history, MMSE, Minnesota ,MNA, Body fat,SF-36, EuroQol five dimensions, EuroQol-Visual Analogue Scale, Katz score, Fear of falling, Tinetti test, TUG test, SPPB test, Gait speed, Grip strength, Peak expiratory flow, Isometric strength | 7                                   |  |



1  
2  
3  
4  
5  
6  
7  
8  
9  
10  
11  
12  
13  
14  
15  
16  
17  
18  
19  
20  
21  
22  
23  
24  
25  
26  
27  
28  
29  
30  
31  
32  
33  
34  
35  
36  
37  
38  
39  
40  
41  
42  
43  
44  
45  
46  
47

|            |        |      |       |     |          |      |           |       |    |                            |   |
|------------|--------|------|-------|-----|----------|------|-----------|-------|----|----------------------------|---|
| Kimyagarov | Israel | 2012 | 41.2% | 109 | 84.9±7.4 | 40.3 | 12 months | 61.5% | HR | Age, sex, BMI              | 7 |
| S          |        |      |       |     |          |      |           |       |    | Charlson comorbidity index |   |

---

EWGSOP(European Working Group for Sarcopenia in Older Persons) defines sarcopenia in men as ALM adjusted for height squared <7.25 kg/m<sup>2</sup> combined with low hand-grip strength (<30 kg) and/or low gait speed(<0.8 m/s).

Quality\* of the studies were assessed with Newcastle-Ottawa Scale(NOS); BMI: body mass index;MMSE: Mini-Mental State Examination; MNA: Mini-Nutritional Assessment; SF-36: Short Form Health Survey questionnaires; EuroQol five dimensions; EuroQol-Visual Analogue Scale; Tinetti test; TUG test: Timed Up and Go; SPPB test: Short physical performance battery

Table 2 Study and Sarcopenia criteria

| study          | Sarcopenia criteria    | Item, tool, Cutoff points | Muscle mass                                                                                                     | Muscle strength       | Physical performance                                       | Ref                                      |                        |    |
|----------------|------------------------|---------------------------|-----------------------------------------------------------------------------------------------------------------|-----------------------|------------------------------------------------------------|------------------------------------------|------------------------|----|
|                |                        | Tool                      | Cutoff points                                                                                                   | Tool                  | Cutoff points                                              | Tool                                     | Cutoff point           |    |
| Yalcin A 2017  | EWFSOP                 | BIA                       | Men: SMI $\leq 8.87 \text{ Kg/m}^2$<br>Women: SMI $\leq 6.42 \text{ Kg/m}^2$                                    | handgrip strength     | Men: HGS $< 30 \text{ Kg}$<br>Women: HGS $< 20 \text{ Kg}$ | Gait speed: 4-m                          | $\leq 0.8 \text{ m/s}$ | 18 |
| Buckinx F 2017 | EWFSOP                 | BIA                       | Men: SMI $\leq 8.87 \text{ Kg/m}^2$<br>Women: SMI $\leq 6.42 \text{ Kg/m}^2$                                    | Handgrip strength     | None                                                       | SPPB: Short Physical Performance Battery | $\leq 0.8 \text{ m/s}$ | 14 |
| Henwood T      | EWFSOP                 | BIA                       | Men: SMI $< 8.87 \text{ kg/m}^2$<br>Women: SMI $< 6.42 \text{ kg/m}^2$                                          | hand grip Strength    | Men: HGS $< 30 \text{ Kg}$<br>Women: HGS $< 20 \text{ Kg}$ | SPPB: Short Physical Performance Battery | $\leq 0.8 \text{ m/s}$ | 16 |
| Saka B         | EWFSOP                 | anthropometric measures   | CC $< 31 \text{ cm}$ in men and women<br>MuAMC $< 23.8 \text{ cm}$ in men<br>MUAMC $< 23.3 \text{ cm}$ in women | hand grip Strength    | Men: HGS $< 30 \text{ Kg}$<br>Women: HGS $< 20 \text{ Kg}$ | Gait speed: 4-m                          | $\leq 0.8 \text{ m/s}$ | 17 |
| Kimyagarov S   | NIH-sponsored workshop | anthropometric measures   | SMM index: (males) $< 10.5 \text{ kg/m}^2$ (females) $< 8.5 \text{ kg/m}^2$                                     | manual muscle testing | MMT* score $< 106$                                         | None                                     | None                   | 19 |

1  
2  
3  
4  
5  
6  
7  
8  
9  
10  
11  
12  
13  
14  
15  
16  
17  
18  
19  
20  
21  
22  
23  
24  
25  
26  
27  
28  
29  
30  
31  
32  
33  
34  
35  
36  
37  
38  
39  
40  
41  
42  
43  
44  
45  
46  
47

|        |        |     |                                   |           |                 |                 |           |    |
|--------|--------|-----|-----------------------------------|-----------|-----------------|-----------------|-----------|----|
| LandiF | EWFSOP | BIA | Men:SMI <8.87 kg/m <sup>2</sup>   | hand grip | Men:HGS <30Kg   | Gait speed: 4-m | ≤ 0.8 m/s | 15 |
|        |        |     | Women:SMI <6.42 kg/m <sup>2</sup> | Strength  | Women:HGS <20Kg |                 |           |    |

MMT\*:an isometric semi-quantitative measurement of eight limb muscles groups, in which muscle strength has subjective grades.  
 On the classic 0 to 5-point scale, the lowest grade (0) indicates no contractility or muscle activation,  
 and the highest possible grade (160 points) represents full resistance.

Table 3  
 Result of the Newcastle-Ottawa scale quality assessment

| Newcastle-Ottawa scale |                                                                          | Saka B 2015 | Yalcin A 2017 | LandiF 2012 | Kimyagarov S 2012 | Henwood T 2017 | Buckinx F 2017 |
|------------------------|--------------------------------------------------------------------------|-------------|---------------|-------------|-------------------|----------------|----------------|
| Selection(4)           | Representativeness of the exposed cohort                                 | 1           | 1             | 1           | 1                 | 1              | 1              |
|                        | Selection of the non-exposed cohort                                      | 1           | 1             | 1           | 1                 | 1              | 1              |
|                        | Ascertainment of exposure                                                | 1           | 1             | 1           | 1                 | 1              | 1              |
|                        | Demonstration that outcome of interest was not present at start of study | 1           | 1             | 1           | 1                 | 1              | 1              |
| Comparability(2)       | Comparability of cohorts on the basis of the design or analysis          | 2           | 1             | 2           | 1                 | 1              | 2              |
| Outcome(3)             | Assessment of outcome                                                    | 1           | 1             | 1           | 1                 | 1              | 1              |
|                        | Was follow-up long enough for                                            | 0           | 0             | 0           | 0                 | 0              | 0              |

1  
2  
3  
4  
5  
6  
7  
8  
9  
10  
11  
12  
13  
14  
15  
16  
17  
18  
19  
20  
21  
22  
23  
24  
25  
26  
27  
28  
29  
30  
31  
32  
33  
34  
35  
36  
37  
38  
39  
40  
41  
42  
43  
44  
45  
46  
47

|            |                                  |   |   |   |   |   |   |
|------------|----------------------------------|---|---|---|---|---|---|
|            | outcome to occur                 |   |   |   |   |   |   |
|            | Adequacy of follow up of cohorts | 1 | 1 | 1 | 1 | 1 | 1 |
| Quality(9) | Total                            | 8 | 7 | 8 | 7 | 6 | 7 |

For peer review only

1  
2  
3 Figure 1. The flow diagram of studies selection.

4 Figure 2. Meta-analysis of the association between sarcopenia and mortality among older nursing  
5 home residents.

6  
7 Figure 3. Subgroup analyses of the meta-analysis according to length of follow-up.

8  
9 Figure 4. Subgroup analyses of the meta-analysis according to different diagnosis tools for muscle  
10 mass.

11 Figure 5. Funnel plot of sarcopenia and all-cause mortality among older nursing home residents.

12  
13 Figure 6. Sensitivity analysis of all studies.  
14  
15  
16  
17  
18  
19  
20  
21  
22  
23  
24  
25  
26  
27  
28  
29  
30  
31  
32  
33  
34  
35  
36  
37  
38  
39  
40  
41  
42  
43  
44  
45  
46  
47  
48  
49  
50  
51  
52  
53  
54  
55  
56  
57  
58  
59  
60

For peer review only

1  
2  
3  
4  
5  
6  
7  
8  
9  
10  
11  
12  
13  
14  
15  
16  
17  
18  
19  
20  
21  
22  
23  
24  
25  
26  
27  
28  
29  
30  
31  
32  
33  
34  
35  
36  
37  
38  
39  
40  
41  
42  
43  
44  
45  
46  
47  
48  
49  
50  
51  
52  
53  
54  
55  
56  
57  
58  
59  
60



Figure 1. The flow diagram of studies selection.



From: Moher D, Liberati A, Tetzlaff J, Altman DG, The PRISMA Group (2009). Preferred Reporting Items for Systematic Reviews and Meta-Analyses: The PRISMA Statement. PLoS Med 6(6): e1000097. doi:10.1371/journal.pmed1000097

For more information, visit [www.prisma-statement.org](http://www.prisma-statement.org).

Figure 1. The flow diagram of studies selection.

215x279mm (300 x 300 DPI)

1  
2  
3  
4  
5  
6  
7  
8  
9  
10  
11  
12  
13  
14  
15  
16  
17  
18  
19  
20  
21  
22  
23  
24  
25  
26  
27  
28  
29  
30  
31  
32  
33  
34  
35  
36  
37  
38  
39  
40  
41  
42  
43  
44  
45  
46  
47  
48  
49  
50  
51  
52  
53  
54  
55  
56  
57  
58  
59  
60

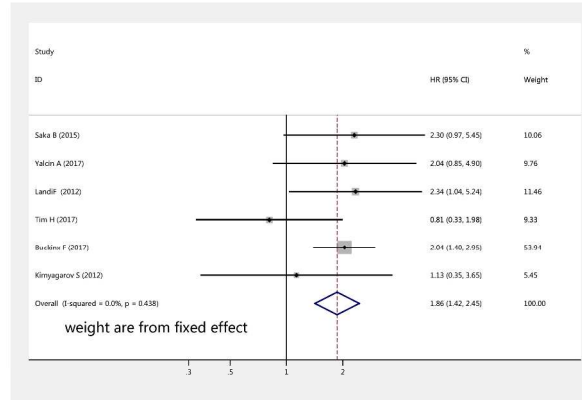

Figure 2. Meta-analysis of the association between Sarcopenia and mortality

Figure 2. Meta-analysis of the association between Sarcopenia and mortality

297x420mm (300 x 300 DPI)

1  
2  
3  
4  
5  
6  
7  
8  
9  
10  
11  
12  
13  
14  
15  
16  
17  
18  
19  
20  
21  
22  
23  
24  
25  
26  
27  
28  
29  
30  
31  
32  
33  
34  
35  
36  
37  
38  
39  
40  
41  
42  
43  
44  
45  
46  
47  
48  
49  
50  
51  
52  
53  
54  
55  
56  
57  
58  
59  
60



Figure 3. Subgroup analyses of the meta-analysis according to length of follow-up

Figure 3. Subgroup analyses of the meta-analysis according to length of follow-up

297x420mm (300 x 300 DPI)



1  
2  
3  
4  
5  
6  
7  
8  
9  
10  
11  
12  
13  
14  
15  
16  
17  
18  
19  
20  
21  
22  
23  
24  
25  
26  
27  
28  
29  
30  
31  
32  
33  
34  
35  
36  
37  
38  
39  
40  
41  
42  
43  
44  
45  
46  
47  
48  
49  
50  
51  
52  
53  
54  
55  
56  
57  
58  
59  
60

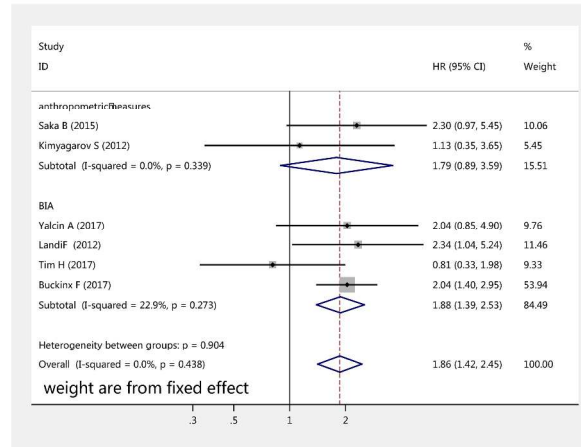

Figure 4. Subgroup analyses of the meta-analysis according to different diagnosis tools for muscle mass.

Figure 4. Subgroup analyses of the meta-analysis according to different diagnosis tools for muscle mass.

297x420mm (300 x 300 DPI)

1  
2  
3  
4  
5  
6  
7  
8  
9  
10  
11  
12  
13  
14  
15  
16  
17  
18  
19  
20  
21  
22  
23  
24  
25  
26  
27  
28  
29  
30  
31  
32  
33  
34  
35  
36  
37  
38  
39  
40  
41  
42  
43  
44  
45  
46  
47  
48  
49  
50  
51  
52  
53  
54  
55  
56  
57  
58  
59  
60



Figure 5. Funnel plot of sarcopenia and all-cause mortality among older nursing home residents

Figure 5. Funnel plot of sarcopenia and all-cause mortality among older nursing home residents

297x420mm (300 x 300 DPI)

1  
2  
3  
4  
5  
6  
7  
8  
9  
10  
11  
12  
13  
14  
15  
16  
17  
18  
19  
20  
21  
22  
23  
24  
25  
26  
27  
28  
29  
30  
31  
32  
33  
34  
35  
36  
37  
38  
39  
40  
41  
42  
43  
44  
45  
46  
47  
48  
49  
50  
51  
52  
53  
54  
55  
56  
57  
58  
59  
60



Figure.6 Sensitivity analysis of all studies.

Figure.6 Sensitivity analysis of all studies.

297x420mm (300 x 300 DPI)

1  
2  
3 MEDLINE (via PubMed)

- 4 #1: Search sarcopenia\*  
5  
6 #2: Search "Sarcopenia"[Mesh]  
7 #3: Search ("Sarcopenia"[Mesh]) OR sarcopenia\*  
8 #4: Search "Mortality"[Mesh]  
9 #5: Search mortality\*  
10 #6: Search "Death"[Mesh]  
11 #7: Search death\*  
12 #8: Search survival\*  
13 #9: Search "Survival"[Mesh]  
14 #10: Search (((("Survival"[Mesh]) OR survival\*) OR death\*) OR "Death"[Mesh]) OR mortality\*) OR  
15 "Mortality"[Mesh]  
16 #11: Search ((((((("Survival"[Mesh]) OR survival\*) OR death\*) OR "Death"[Mesh]) OR mortality\*)  
17 OR "Mortality"[Mesh])) AND (("Sarcopenia"[Mesh]) OR sarcopenia\*)  
18  
19  
20  
21  
22

23 Cochrane CENTRAL Library

- 24  
25 #1: Search sarcopenia\*  
26 #2: Search MeSH descriptor: [Sarcopenia] explode all trees  
27 #3: #1OR #2  
28 #4: Search MeSH descriptor: [mortality] explode all trees  
29 #5: Search mortality\*  
30 #6: Search MeSH descriptor: [death] explode all trees  
31 #7: Search death\*  
32 #8: Search survival\*  
33 #9: Search MeSH descriptor: [survival] explode all trees  
34 #10: #4 OR #5 OR #6 OR #7 OR #8 OR #9  
35 #11: # 3 AND #10  
36  
37  
38  
39  
40

41 EMBASE

- 42  
43 #1: 'sarcopenia'/exp  
44 #2: 'mortality'/exp  
45 #3: 'death'/exp  
46 #4: 'survival'/exp  
47 #5: #2 OR #3 OR #4  
48 #6: #1 AND #5  
49  
50  
51  
52  
53  
54  
55  
56  
57  
58  
59  
60

## MOOSE Checklist for Meta-analyses of Observational Studies

| Item No                                     | Recommendation                                                                                                                                                                                                                                                               | Reported on Page No |
|---------------------------------------------|------------------------------------------------------------------------------------------------------------------------------------------------------------------------------------------------------------------------------------------------------------------------------|---------------------|
| Reporting of background should include      |                                                                                                                                                                                                                                                                              |                     |
| 1                                           | Problem definition                                                                                                                                                                                                                                                           | 3                   |
| 2                                           | Hypothesis statement                                                                                                                                                                                                                                                         | 3                   |
| 3                                           | Description of study outcome(s)                                                                                                                                                                                                                                              | 3                   |
| 4                                           | Type of exposure or intervention used                                                                                                                                                                                                                                        | 3                   |
| 5                                           | Type of study designs used                                                                                                                                                                                                                                                   | 3                   |
| 6                                           | Study population                                                                                                                                                                                                                                                             | 4                   |
| Reporting of search strategy should include |                                                                                                                                                                                                                                                                              |                     |
| 7                                           | Qualifications of searchers (eg, librarians and investigators)                                                                                                                                                                                                               | None                |
| 8                                           | Search strategy, including time period included in the synthesis and key words                                                                                                                                                                                               | 4                   |
| 9                                           | Effort to include all available studies, including contact with authors                                                                                                                                                                                                      | 4                   |
| 10                                          | Databases and registries searched                                                                                                                                                                                                                                            | 4                   |
| 11                                          | Search software used, name and version, including special features used (eg, explosion)                                                                                                                                                                                      | 4                   |
| 12                                          | Use of hand searching (eg, reference lists of obtained articles)                                                                                                                                                                                                             | 4                   |
| 13                                          | List of citations located and those excluded, including justification                                                                                                                                                                                                        | 4                   |
| 14                                          | Method of addressing articles published in languages other than English                                                                                                                                                                                                      | 5                   |
| 15                                          | Method of handling abstracts and unpublished studies                                                                                                                                                                                                                         | 6                   |
| 16                                          | Description of any contact with authors                                                                                                                                                                                                                                      | 6                   |
| Reporting of methods should include         |                                                                                                                                                                                                                                                                              |                     |
| 17                                          | Description of relevance or appropriateness of studies assembled for assessing the hypothesis to be tested                                                                                                                                                                   | 5                   |
| 18                                          | Rationale for the selection and coding of data (eg, sound clinical principles or convenience)                                                                                                                                                                                | 5                   |
| 19                                          | Documentation of how data were classified and coded (eg, multiple raters, blinding and interrater reliability)                                                                                                                                                               | 5                   |
| 20                                          | Assessment of confounding (eg, comparability of cases and controls in studies where appropriate)                                                                                                                                                                             | 5                   |
| 21                                          | Assessment of study quality, including blinding of quality assessors, stratification or regression on possible predictors of study results                                                                                                                                   | 5                   |
| 22                                          | Assessment of heterogeneity                                                                                                                                                                                                                                                  | 6                   |
| 23                                          | Description of statistical methods (eg, complete description of fixed or random effects models, justification of whether the chosen models account for predictors of study results, dose-response models, or cumulative meta-analysis) in sufficient detail to be replicated | 6                   |
| 24                                          | Provision of appropriate tables and graphics                                                                                                                                                                                                                                 | 7                   |
| Reporting of results should include         |                                                                                                                                                                                                                                                                              |                     |
| 25                                          | Graphic summarizing individual study estimates and overall estimate                                                                                                                                                                                                          | 7                   |
| 26                                          | Table giving descriptive information for each study included                                                                                                                                                                                                                 | 7                   |
| 27                                          | Results of sensitivity testing (eg, subgroup analysis)                                                                                                                                                                                                                       | 8                   |
| 28                                          | Indication of statistical uncertainty of findings                                                                                                                                                                                                                            | None                |

| Item No                                 | Recommendation                                                                                                            | Reported on Page No |
|-----------------------------------------|---------------------------------------------------------------------------------------------------------------------------|---------------------|
| Reporting of discussion should include  |                                                                                                                           |                     |
| 29                                      | Quantitative assessment of bias (eg, publication bias)                                                                    | 9                   |
| 30                                      | Justification for exclusion (eg, exclusion of non-English language citations)                                             | 9                   |
| 31                                      | Assessment of quality of included studies                                                                                 | None                |
| Reporting of conclusions should include |                                                                                                                           |                     |
| 32                                      | Consideration of alternative explanations for observed results                                                            | 11                  |
| 33                                      | Generalization of the conclusions (ie, appropriate for the data presented and within the domain of the literature review) | 11                  |
| 34                                      | Guidelines for future research                                                                                            | 11                  |
| 35                                      | Disclosure of funding source                                                                                              | 12                  |

From: Stroup DF, Berlin JA, Morton SC, et al, for the Meta-analysis Of Observational Studies in Epidemiology (MOOSE) Group. Meta-analysis of Observational Studies in Epidemiology. A Proposal for Reporting. *JAMA*. 2000;283(15):2008-2012. doi: 10.1001/jama.283.15.2008.

Transcribed from the original paper within the NEUROSURGERY® Editorial Office, Atlanta, GA, United States. August 2012.
