# Supplementary material for: Sarcopenia as a predictor of all-cause mortality among older nursing home residents: a systematic review and meta-analysis
Source: PubMed Central journal article supplement — BMJ Open. 2018 Nov 12;8(11):e021252. doi: 10.1136/bmjopen-2017-021252 (PMC6252774; doi:10.1136/bmjopen-2017-021252), 2018-11-12
Supplement: bmjopen-2017-021252supp001.pdf [file bmjopen-2017-021252supp001.pdf]

## MEDLINE (via PubMed)

- #1: Search sarcopenia\*
- #2: Search "Sarcopenia"[Mesh]
- #3: Search ("Sarcopenia"[Mesh]) OR sarcopenia\*
- #4: Search "Mortality"[Mesh]
- #5: Search mortality\*
- #6: Search "Death"[Mesh]
- #7: Search death\*
- #8: Search survival\*
- #9: Search "Survival"[Mesh]
- #10: Search (((("Survival"[Mesh]) OR survival\*) OR death\*) OR "Death"[Mesh]) OR mortality\*) OR "Mortality"[Mesh]
- #11: Search ((((((("Survival"[Mesh]) OR survival\*) OR death\*) OR "Death"[Mesh]) OR mortality\*) OR "Mortality"[Mesh])) AND (("Sarcopenia"[Mesh]) OR sarcopenia\*)

## Cochrane CENTRAL Library

- #1: Search sarcopenia\*
- #2: Search MeSH descriptor: [Sarcopenia] explode all trees
- #3: #1OR #2
- #4: Search MeSH descriptor: [mortality] explode all trees
- #5: Search mortality\*
- #6: Search MeSH descriptor: [death] explode all trees
- #7: Search death\*
- #8: Search survival\*
- #9: Search MeSH descriptor: [survival] explode all trees
- #10: #4 OR #5 OR #6 OR #7 OR #8 OR #9
- #11: # 3 AND #10

## EMBASE

- #1: 'sarcopenia'/exp
- #2: 'mortality'/exp
- #3: 'death'/exp
- #4: 'survival'/exp
- #5: #2 OR #3 OR #4
- #6: #1 AND #5
